# Supplementary material for: Characterization of the Impact of Density Gradient Centrifugation on the Profile of the Pig Sperm Transcriptome by RNA-Seq
Source: Front Vet Sci. 2021 Jul 19;8:668158. doi: 10.3389/fvets.2021.668158 (PMC8326511; doi:10.3389/fvets.2021.668158)
Supplement: Supplementary Table 1 — Phenotypic values for several semen quality parameters of the four ejaculates used in this study. [file Table_1.xlsx]

## Sheet: Sheet1
Sample	Ejaculate volume (mL)	Sperm cell Concentration	Sperm cell viability	Percentage of sperm with abnormalities of the head	Percentage of sperm with abnormalities of the neck	Percentage of sperm with abnormalities of the tail	Percentage of sperm with proximal droplets	Percentage of sperm with distal droplets	Percentage of motile sperm
B1	552.001	190.001	81.501	0	3.4	2	4.9	1.5	94.8
B2	465.001	162.001	93.201	0.501	1.001	8.301	0.501	1.001	72.701
B3	667.001	66.001	78.001	4.401	3.401	0.001	1.001	2.401	96.201
B4	379.001	146.001	83.401	4.901	2.401	1.001	2.001	2.401	81.701
