# Supplementary material for: Characterization of the Impact of Density Gradient Centrifugation on the Profile of the Pig Sperm Transcriptome by RNA-Seq
Source: Front Vet Sci. 2021 Jul 19;8:668158. doi: 10.3389/fvets.2021.668158 (PMC8326511; doi:10.3389/fvets.2021.668158)
Supplement: Supplementary Table 2 — RNA extraction and qPCR data. P_B1, Purified sample of B1; NP_B1, Non-purified sample of B1; P_B2, Purified sample of B2; NP_B2, Non-purified sample of B2; P_B3, Purified sample of B3; NP_B3, Non-purified sample of B3; P_B4, Purified sample of B4; NP_B4, Non-purified sample of B4; P_average, Average value of the purified samples; NP_average, Average value of the non-purified samples. [file Table_2.xlsx]

## Sheet: Sheet1
Purified samples								Non-purified samples
Sample	Qubit (ng/ul)	Total RNA yield (qubit)	A260/280	A260/230	qPCR PRM1	qPCR PTPRC	ΔCt_PTPRC-PRM1	Sample	Qubit (ng/ul)	Total RNA yield (qubit)	A260/280	A260/230	qPCR PRM1	qPCR PTPRC	ΔCt_PTPRC-PRM1	qPCR intergenic
P_B1	9.92	198.4	1.93	0.24	17.12	36.67	19.55	NP_B1	19.4	465.6	1.77	0.06	16.33	35.92	19.59	Undetectable in P and NP
P_B2	7.58	151.6	1.61	0.07	16.36	36.50	20.14	NP_B2	25.2	604.8	1.56	0.11	15.69	32.63	16.94	Undetectable in P and NP
P_B3	5.86	117.2	1.63	0.03	16.17	37.17	21.00	NP_B3	11.8	283.2	1.35	0.08	17.21	37.59	20.38	Undetectable in P and NP
P_B4	6.3	126	1.69	0.03	17.48	35.60	18.12	NP_B4	6.16	147.84	1.52	0.07	17.61	36.27	18.66	Undetectable in P and NP
P average	-	-	-	-	16.78	36.48	19.70	NP average	-	-	-	-	16.71	35.60	18.89	-
