# Supplementary material for: Characterization of the Impact of Density Gradient Centrifugation on the Profile of the Pig Sperm Transcriptome by RNA-Seq
Source: Front Vet Sci. 2021 Jul 19;8:668158. doi: 10.3389/fvets.2021.668158 (PMC8326511; doi:10.3389/fvets.2021.668158)
Supplement: Supplementary Table 3 — Sequencing metrics. P_B1: Purified sample of B1; NP_B1: Non-purified sample of B1; P_B2: Purified sample of B2; NP_B2: Non-purified sample of B2; P_B3: Purified sample of B3; NP_B3: Non-purified sample of B3; P_B4: Purified sample of B4; NP_B4: Non-purified sample of B4. [file Table_3.xlsx]

## Sheet: Sheet1
Sequencing metrics parameter	NP_B1	NP_B2	NP_B3	NP_B4	P_B1	P_B2	P_B3	P_B4	Average in NP (SD)	Average in P (SD)	Wilcoxon test (P versus paired NP)
Number of obtained RNA-seq reads	79727300	81611686	52329448	87515962	79077370	47749108	56415330	56785734	75,296,099 (15,666,464)	60,006,885 (13,381,724)	0.37
Number of reads passing quality control	79280258	81093588	51965984	86939740	78565392	47397784	56029972	56394444	74,819,892 (15,582,532)	59,596,898 (13,311,659)	0.37
Percentage of reads passing quality control	0.9943	0.9936	0.993	0.9934	0.9935	0.9926	0.9931	0.9931	99.4% (0.00056)	99.3% (0.00036)	0.25
Number of reads mapped to the Sscrofa11.1 genome	55324806	56081934	34994428	46938360	58631792	31852780	42753632	37285326	48,334,882 (9,811,453)	42,630,882 (11,558,354)	0.62
Percentage of reads mapped to the Ssc11.1 genome	0.6978	0.6915	0.6734	0.5398	0.7462	0.672	0.763	0.6611	65.1% (0.07457)	71.1% (0.05149)	0.25
Number of uniquely mapped reads	9020901	8279314	6741966	6419329	8145412	7693605	7709713	6896179	7,615,377 (1,239,582)	7,611,227 (520,619)	1
Percentage of non duplicate reads	0.1137	0.102	0.1297	0.0738	0.1036	0.1623	0.1376	0.1222	10.5% (0.02358)	13.1% (0.0248)	0.37
