# Supplementary material for: Characterization of the Impact of Density Gradient Centrifugation on the Profile of the Pig Sperm Transcriptome by RNA-Seq
Source: Front Vet Sci. 2021 Jul 19;8:668158. doi: 10.3389/fvets.2021.668158 (PMC8326511; doi:10.3389/fvets.2021.668158)
Supplement: Supplementary Table 4 — Gene abundance across the eight samples for the 7,519 protein coding genes with average FPKM ≥ 1. DAG, Differentially abundant gene; FDR, False Discovery Rate; P_B1, Purified sample of B1; NP_B1, Non-purified sample of B1; P_B2, Purified sample of B2; NP_B2, Non-purified sample of B2; P_B3, Purified sample of B3; NP_B3, Non-purified sample of B3; P_B4, Purified sample of B4; NP_B4, Non-purified sample of B4. [file Table_4.xlsx]

## Sheet: Sheet1
Gene Ensembl identifier	Gene name	DAG	FDR	NP_B1	P_B1	NP_B2	P_B2	NP_B3	P_B3	NP_B4	P_B4	Average in all samples	Average in NP	Average in P
ENSSSCG00000041806		YES	5.74e-14	36.348	2.20401	131.88	15.0469	61.4033	17.7541	47.7779	7.93971	40.0443	69.3523	10.7362
ENSSSCG00000037274	PTMA	YES	2.31e-12	33.5236	2.79322	35.8625	10.9588	54.9915	7.4188	102.788	7.0257	31.9203	56.7914	7.04912
ENSSSCG00000005373	ANP32B; NANS	YES	2.31e-12	18.2825	0.521089	36.1162	8.22902	36.5853	10.8931	19.3685	1.83666	16.4791	27.5881	5.36997
ENSSSCG00000006816	AHCYL1	YES	2.44e-12	4.88073	0.255291	1.56746	0.209358	5.06743	0.160448	9.10711	0.440553	2.71105	5.15568	0.266412
ENSSSCG00000009019	RPS3A	YES	2.92e-12	15.4096	1.46789	11.4867	3.02972	28.8648	4.8598	36.0735	2.25866	12.9313	22.9586	2.90402
ENSSSCG00000032111	RPL7	YES	1.86e-11	13.191	1.16682	17.4255	8.24856	31.745	4.45215	41.1031	5.54952	15.3602	25.8661	4.85426
ENSSSCG00000034617	RPS27A	YES	1.86e-11	11.2878	1.17829	10.6728	2.33549	17.8077	5.31033	16.8868	3.02955	8.56359	14.1638	2.96341
ENSSSCG00000012119	TMSB4X	YES	3.66e-11	18.7127	1.68664	15.8316	2.50773	28.4624	3.40827	48.4557	9.55563	16.0776	27.8656	4.28957
ENSSSCG00000040470	RPS20	YES	4.09e-11	10.4536	1.07419	9.74457	4.33869	19.4685	8.1901	18.1302	6.46559	9.73318	14.4492	5.01714
ENSSSCG00000004489	EEF1A1	YES	4.45e-11	114.433	8.41295	89.2771	42.8793	144.011	41.871	279.402	26.8841	93.3964	156.781	30.0118
ENSSSCG00000033019	RPL12	YES	5.75e-11	16.6487	0.839606	14.6845	2.99051	29.5518	4.88576	53.3563	5.46637	16.0529	28.5603	3.54556
ENSSSCG00000029724	RACK1	YES	6.59e-11	24.7854	2.27987	16.4983	4.32292	37.1268	10.4725	49.5631	8.31289	19.1702	31.9934	6.34705
ENSSSCG00000031088	RPS7	YES	6.98e-11	105.099	10.4772	67.5505	39.2489	173.682	56.7748	154.964	43.0433	81.3549	125.324	37.3861
ENSSSCG00000040929	TPT1	YES	7.28e-11	85.2486	5.86747	72.3826	15.2904	128.44	31.164	204.215	9.83959	69.056	122.572	15.5404
ENSSSCG00000035080	RPL23A	YES	1.07e-10	147.535	7.3032	106.56	39.9712	177.986	57.8517	182.002	44.87	95.5098	153.521	37.499
ENSSSCG00000020830	NACA	YES	2.72e-10	11.8126	0.346929	14.1605	4.48648	16.4733	4.87988	17.5028	2.0329	8.96193	14.9873	2.93655
ENSSSCG00000004970	RPLP1	YES	5.56e-10	131.075	8.92897	85.0839	47.9868	196.281	53.4739	228.727	40.4588	99.0019	160.292	37.7121
ENSSSCG00000003165	RPS11	YES	7.6e-10	31.2941	3.31118	37.9277	13.7264	87.1016	24.2747	78.1398	11.4554	35.9039	58.6158	13.1919
ENSSSCG00000037112	LOC110259943	YES	1.43e-09	70.189	0.717478	5.09741	0.901618	35.6265	4.83613	34.7218	1.78357	19.2342	36.4087	2.0597
ENSSSCG00000033326	RPL37	YES	1.75e-09	17.7226	2.29857	15.0769	6.74736	28.2878	11.8114	25.6687	8.5434	14.5196	21.689	7.35018
ENSSSCG00000016275	NCL	YES	2.7e-09	11.2681	1.66148	8.75391	3.21118	16.592	4.09766	24.057	2.734	9.04692	15.1678	2.92608
ENSSSCG00000012405	RPS4X	YES	3.05e-09	37.3494	1.51914	35.6072	14.3061	69.8778	17.8808	81.7015	5.97016	33.0265	56.134	9.91905
ENSSSCG00000038880	RPL23	YES	3.29e-09	33.153	0.660603	35.2128	8.35093	69.9152	18.1404	76.8725	13.9978	32.0379	53.7884	10.2874
ENSSSCG00000035997	RPL10	YES	4.06e-09	60.2862	2.17965	48.579	15.3301	95.4646	31.2343	130.183	10.7904	49.2559	83.6281	14.8836
ENSSSCG00000017047	CLINT1	YES	4.06e-09	6.51545	0.48084	3.6712	1.10585	4.39077	0.873095	11.7855	1.45536	3.78476	6.59074	0.978787
ENSSSCG00000033697	RPS2	YES	4.63e-09	18.1071	3.16687	17.7042	7.19545	48.8259	12.8907	41.5017	5.44798	19.355	31.5347	7.17526
ENSSSCG00000036296	RPS25	YES	5.51e-09	22.9105	0.213857	20.5347	6.65893	44.1032	10.6441	56.0354	7.98211	21.1354	35.896	6.37474
ENSSSCG00000040494	RPL3	YES	6.8e-09	41.2601	2.94865	19.3437	14.0409	57.3321	11.8408	55.9007	11.476	26.7679	43.4591	10.0766
ENSSSCG00000001701	HSP90AB1	YES	7.22e-09	7.5106	0.129676	4.44949	2.41919	13.0526	1.79362	13.9348	0.990667	5.53508	9.73688	1.33329
ENSSSCG00000005401		YES	7.87e-09	7.21129	0.21317	103.627	13.2548	26.1869	7.36787	19.6651	3.05564	22.5727	39.1726	5.97286
ENSSSCG00000005169	RPS6	YES	1e-08	16.413	1.83144	12.5047	5.80184	37.6258	8.36419	32.4813	2.62229	14.7056	24.7562	4.65494
ENSSSCG00000014855	RPS3	YES	1.01e-08	15.7419	0.547905	10.6181	6.1291	32.0808	5.35671	25.0408	4.67871	12.5242	20.8704	4.1781
ENSSSCG00000024260	RPL11	YES	2.57e-08	42.5507	0.239277	33.2772	8.81838	69.7654	17.8906	75.0647	3.56584	31.3965	55.1645	7.62853
ENSSSCG00000034448	RPL13A	YES	3.63e-08	25.167	3.43777	12.2574	9.44658	37.5627	10.2963	36.1488	6.98521	17.6627	27.784	7.54148
ENSSSCG00000017509	RPL19	YES	4.47e-08	25.8751	3.96648	22.4125	8.9748	56.8042	15.3025	65.5194	8.14354	25.8748	42.6528	9.09683
ENSSSCG00000028850	RPL26	YES	4.72e-08	31.6487	0.969479	28.9037	8.77424	63.3252	17.0423	62.6407	2.70064	27.0006	46.6296	7.37167
ENSSSCG00000012999	CAPN1	YES	4.72e-08	3.14475	0.026619	0.663376	0.190039	3.05973	0.167496	7.28312	0.135818	1.83387	3.53774	0.129993
ENSSSCG00000035811	RPL32	YES	6.89e-08	16.1537	1.21389	16.0011	6.98947	26.4878	8.77491	32.143	4.92701	14.0864	22.6964	5.47632
ENSSSCG00000027358	RPS17	YES	8.21e-08	22.9018	1.03074	15.7086	7.60146	40.1742	13.2711	43.9378	6.80255	18.9285	30.6806	7.17646
ENSSSCG00000015013	RDX	YES	9.73e-08	16.2236	2.35359	44.9308	15.452	36.5945	9.94968	15.3238	5.6182	18.3058	28.2682	8.34337
ENSSSCG00000016128	EEF1B2	YES	9.73e-08	13.5786	0.972522	12.6082	5.37597	28.5515	6.20664	43.8755	4.44894	14.4522	24.6535	4.25102
ENSSSCG00000036014	RPLP0	YES	9.94e-08	108.416	18.4174	69.2199	41.5634	151.605	48.8746	154.893	29.3879	77.7972	121.034	34.5608
ENSSSCG00000035007	RPL17-C18orf32	YES	1.14e-07	52.8562	1.66225	36.5149	16.4584	78.7753	31.5013	76.2887	10.5886	38.0807	61.1088	15.0526
ENSSSCG00000039130	RPL6	YES	1.26e-07	12.7535	1.01521	10.5557	6.70292	23.2205	6.50721	37.2126	2.0407	12.501	20.9356	4.06651
ENSSSCG00000037236	RPSA	YES	1.33e-07	54.6144	1.11804	59.0723	29.6373	181.854	58.2996	125.694	11.5689	65.2324	105.309	25.156
ENSSSCG00000039046	RPL36A-HNRNPH2	YES	1.55e-07	25.0541	2.4651	16.9929	6.68648	44.1138	8.94119	40.9133	2.91021	18.5096	31.7685	5.25074
ENSSSCG00000024347	CRISP3	YES	1.56e-07	9.30115	0.396728	1.57856	0	7.35717	0.200301	1.67652	0	2.5638	4.97835	0.149257
ENSSSCG00000047888		YES	1.68e-07	16.821	1.4198	51.1148	5.3755	39.6914	9.09766	16.885	6.78194	18.3984	31.1281	5.66873
ENSSSCG00000039544	RPS24	YES	3.93e-07	15.2921	0.304211	14.0398	5.85029	19.1583	7.13466	23.4807	5.59509	11.3569	17.9927	4.72106
ENSSSCG00000007056	PLCB1	YES	3.93e-07	1.97074	0.150333	0.969359	0.216788	3.32469	0.697394	4.85428	0.189278	1.54661	2.77977	0.313448
ENSSSCG00000037030	RPL15	YES	3.99e-07	6.34407	0.619035	6.98806	2.56458	10.4103	3.49939	18.8135	3.69219	6.6164	10.639	2.5938
ENSSSCG00000001213	GPX6	YES	4.15e-07	3.54064	0	3.91379	0.24673	10.9708	1.07876	10.0977	0.391192	3.77994	7.13071	0.429172
ENSSSCG00000016778	NLN	YES	4.3e-07	1.982	0	0.92692	0.133926	2.04567	0	3.61717	0.01229	1.08975	2.14294	0.036554
ENSSSCG00000004875	CYB5A	YES	4.4e-07	31.4509	0.441402	13.1363	8.3993	19.8145	4.71124	16.9183	0.917182	11.9736	20.33	3.61728
ENSSSCG00000000207		YES	5.33e-07	19.1932	0.825893	14.2338	1.32461	22.6276	4.32786	35.3298	1.83499	12.4622	22.8461	2.07834
ENSSSCG00000025928	RPL18	YES	5.33e-07	20.6678	1.23905	12.2058	6.32036	19.6075	3.81988	24.9487	2.21969	11.3786	19.3575	3.39974
ENSSSCG00000006899	RPL5	YES	8.14e-07	18.2704	0.235968	12.3067	4.55944	28.5088	9.18793	45.6192	2.55592	15.1556	26.1763	4.13482
ENSSSCG00000045189	MUC21	YES	8.32e-07	38.9067	0.252754	1.94209	0.529186	6.44091	0	1.1294	0	6.15013	12.1048	0.195485
ENSSSCG00000012597	PLS3	YES	8.32e-07	5.02896	0.497168	1.1313	0.271128	5.29782	0.48102	5.62395	0.338582	2.33374	4.27051	0.396975
ENSSSCG00000033610	ZG16B	YES	8.36e-07	18.7563	0	4.44238	0.420555	10.2108	0.70469	11.1776	0.557812	5.78378	11.1468	0.420764
ENSSSCG00000001543	RPL10A	YES	8.36e-07	8.28007	0.37036	5.65329	2.53234	9.49462	3.3597	13.6479	2.33015	5.70856	9.26898	2.14814
ENSSSCG00000017555	LUC7L3	YES	9.35e-07	2.09394	0.461063	7.00363	1.38429	4.06002	0.737879	2.66475	0.649893	2.38193	3.95558	0.808281
ENSSSCG00000025768	CALM1	YES	9.49e-07	7.86249	0.360115	2.1411	1.29543	5.35033	1.84192	8.48252	0.791146	3.51563	5.95911	1.07215
ENSSSCG00000035768	RPS15A	YES	1.13e-06	19.5392	1.55819	14.293	1.77466	23.2983	6.58566	25.9287	9.58057	12.8198	20.7648	4.87477
ENSSSCG00000025507	RPL27	YES	1.23e-06	45.2738	8.66135	39.2475	18.2977	63.5005	19.9791	60.4229	23.0524	34.8044	52.1112	17.4976
ENSSSCG00000012173	SAT1	YES	1.29e-06	50.5619	4.35825	16.0613	6.81677	37.21	11.3311	50.5342	3.3153	22.5236	38.5919	6.45536
ENSSSCG00000005022	NIN	YES	1.56e-06	2.90781	0.04519	0.957092	0.295792	1.9909	0.445275	5.78772	0.095383	1.56565	2.91088	0.22041
ENSSSCG00000017232	SLC9A3R1	YES	1.69e-06	1.74327	0.113825	0.414573	0.045885	2.02852	0.182651	5.45159	0.232292	1.27658	2.40949	0.143663
ENSSSCG00000040325	COX7C	YES	1.86e-06	5.43756	0.293126	2.01903	0.721956	3.51224	0.915443	6.95364	0.673483	2.56581	4.48062	0.651002
ENSSSCG00000026061		YES	2.19e-06	4.75779	0.837549	18.486	7.13362	15.7363	6.99217	6.73114	1.8022	7.80961	11.4278	4.19139
ENSSSCG00000011272	RPL14	YES	2.29e-06	23.2893	1.7631	15.6214	7.4153	41.3425	11.8658	56.6767	4.11411	20.261	34.2325	6.28957
ENSSSCG00000009146	RPL34	YES	2.82e-06	35.4495	4.00456	43.5572	10.0089	76.1704	21.3209	87.1284	3.64691	35.1608	60.5764	9.74531
ENSSSCG00000032015	SH3BGRL2	YES	2.82e-06	3.11696	0.153042	3.185	0.252712	4.85179	0.518803	9.2929	0.621466	2.74908	5.11166	0.386506
ENSSSCG00000003053	BSP1	YES	3.22e-06	41.7025	4.06278	24.4585	8.07025	80.9479	23.396	131.003	3.94075	39.6977	69.528	9.86745
ENSSSCG00000006016	EIF3H	YES	3.64e-06	8.01473	0.212835	6.10165	3.54256	3.75236	2.12088	15.7168	0.617411	5.0099	8.39637	1.62342
ENSSSCG00000010627	PDCD4	YES	4.7e-06	12.8566	0.213948	4.80053	2.44141	10.9196	2.61146	19.6755	0.538692	6.75722	12.0631	1.45138
ENSSSCG00000030122	HIRIP3	YES	5.03e-06	3.41184	0.421715	6.89644	2.71532	8.68798	1.84251	6.26963	2.43516	4.08507	6.31647	1.85368
ENSSSCG00000013597	RPS28	YES	5.13e-06	22.0343	2.14028	28.0912	11.4585	63.5769	2.67396	67.5393	15.9433	26.6822	45.3104	8.054
ENSSSCG00000004578	ANXA2	YES	5.13e-06	10.0725	0.404996	4.47308	1.53225	8.29656	2.75706	27.1493	1.41275	7.01231	12.4979	1.52676
ENSSSCG00000012117	PRPS2	YES	5.13e-06	9.90687	1.11703	2.8176	1.51898	9.26831	1.9433	19.8901	0.861927	5.91551	10.4707	1.36031
ENSSSCG00000025675	EEF2	YES	5.31e-06	42.2546	5.08013	28.5934	23.5738	58.3553	24.0125	84.6232	16.6289	35.3902	53.4566	17.3238
ENSSSCG00000017448	KRT14	YES	5.64e-06	17.3301	1.17997	2.8825	1.46062	10.4218	1.24275	37.9452	0.598926	9.13274	17.1449	1.12057
ENSSSCG00000014071	BTF3	YES	5.72e-06	11.428	0.448135	6.17225	1.22587	11.6723	3.44284	15.4942	2.65747	6.56763	11.1917	1.94358
ENSSSCG00000011201	SATB1	YES	5.72e-06	2.17829	0.178865	1.16901	0.145679	3.19578	0.786898	7.09406	0.181896	1.86631	3.40928	0.323334
ENSSSCG00000002366	NPC2	YES	5.73e-06	8.833	0.731511	9.48806	1.8065	9.55348	2.12633	18.1784	0.369468	6.38585	11.5132	1.25845
ENSSSCG00000038966	KRT7	YES	5.95e-06	3.55363	0.108056	1.22874	0.086572	3.87649	0.177723	3.92308	0	1.61929	3.14548	0.0930877
ENSSSCG00000009327	HMGB1	YES	6.32e-06	19.3558	1.34085	16.2942	4.62665	19.0327	8.67585	45.1919	5.23837	14.9695	24.9686	4.97043
ENSSSCG00000040383	MFAP1	YES	8.11e-06	11.5555	2.36729	27.8109	6.04782	20.4911	6.89475	9.60253	2.57445	10.918	17.365	4.47108
ENSSSCG00000010400	MSMB	YES	8.25e-06	10.1176	0.50349	3.89376	1.04	22.509	6.44095	31.7243	4.16319	10.049	17.0612	3.03691
ENSSSCG00000006296	ATP1B1	YES	9.15e-06	7.57523	0.194018	1.08299	0.479998	4.95123	0.154025	4.19782	0	2.32941	4.45182	0.20701
ENSSSCG00000015140	HSPA8	YES	1.05e-05	4.44001	0.243483	2.23822	1.62093	14.5317	1.40694	6.89724	1.27064	4.08115	7.0268	1.1355
ENSSSCG00000013889	RPL18A	YES	1.06e-05	9.03423	0	6.74554	2.28268	14.395	3.74871	11.8105	2.07874	6.26193	10.4963	2.02753
ENSSSCG00000036716	RPL37A	YES	1.26e-05	5.00265	0.581748	6.5434	1.80056	11.1229	3.99031	10.6999	1.95711	5.21232	8.34221	2.08243
ENSSSCG00000043687	TNNI3	YES	1.28e-05	0.70179	1.89157	1.15228	5.47825	0.825002	3.60589	2.05304	12.446	3.51923	1.18303	5.85543
ENSSSCG00000047841	LOC100621389; LOC110261487; LOC110261673	YES	1.85e-05	2.00588	0	0.617854	0.220929	4.32211	0.674236	8.02953	0.344766	2.02691	3.74384	0.309983
ENSSSCG00000003930	RPS8	YES	2.04e-05	45.382	2.6824	29.1251	18.0661	62.0772	30.3714	62.5163	11.7681	32.7486	49.7751	15.722
ENSSSCG00000037674		YES	2.04e-05	33.2732	3.89077	30.64	12.6217	62.6699	13.7075	92.0715	4.48004	31.6693	54.6637	8.675
ENSSSCG00000005267	ANXA1	YES	2.11e-05	30.5675	0.532563	1.09803	0.249539	4.61608	1.21638	1.92894	0.827917	5.12961	9.55263	0.706599
ENSSSCG00000004058	EZR	YES	2.15e-05	10.0696	0.562509	3.15168	1.20138	6.98302	3.08556	14.3511	0.83689	5.03022	8.63886	1.42159
ENSSSCG00000030632	UBE2V1	YES	2.15e-05	6.74028	1.25184	6.9264	3.15465	8.27159	2.1769	8.06267	3.46032	5.00558	7.50023	2.51093
ENSSSCG00000012534	MORF4L2	YES	2.19e-05	2.34052	0.188285	0.425689	0.148689	4.9955	0.315912	7.20385	0.284962	1.98793	3.74139	0.234462
ENSSSCG00000033560	LOC110261633; LOC110261637; LOC110261636	YES	2.21e-05	7.24509	0	0.508503	0.170774	15.9649	1.44342	10.7388	0	4.50894	8.61433	0.403549
ENSSSCG00000008180	EIF5B	YES	2.69e-05	2.44585	0.392642	2.10191	0.618641	2.52675	0.912027	3.6888	0.60261	1.66115	2.69083	0.63148
ENSSSCG00000011351	TMA7	YES	2.95e-05	30.7709	3.11188	17.1824	2.51597	17.6856	7.05535	41.7161	6.3353	15.7967	26.8387	4.75462
ENSSSCG00000039953	PNRC1	YES	2.95e-05	2.21251	0.079069	2.12066	0.841251	4.22643	3.63455	4.02705	1.13228	2.28422	3.14666	1.42179
ENSSSCG00000026271	NUDT11	YES	3.72e-05	2.57914	0	1.53895	0.311823	2.41607	0	12.39	0	2.4045	4.73104	0.0779558
ENSSSCG00000014283	KIF3A	YES	4.28e-05	2.93593	0.410729	6.9859	1.51533	6.12167	2.40936	2.99572	0.742223	3.01461	4.7598	1.26941
ENSSSCG00000012427		YES	4.43e-05	28.8021	2.60042	37.6128	4.90677	28.3418	16.1244	60.5906	6.13383	23.1391	38.8368	7.44135
ENSSSCG00000007381	YWHAB	YES	4.5e-05	11.9045	0.702972	5.35869	1.66419	4.55868	1.86382	9.26052	1.08977	4.55039	7.7706	1.33019
ENSSSCG00000000288	HNRNPA1	YES	4.77e-05	8.71599	1.57881	9.03842	5.32672	14.9512	4.92351	20.5386	6.85211	8.99068	13.3111	4.67029
ENSSSCG00000000951	CSRP2	YES	4.77e-05	4.27633	0	1.59606	0	2.4948	0	3.57359	0	1.4926	2.9852	0
ENSSSCG00000004464	TENT5A	YES	4.86e-05	2.6553	0.196428	0.631786	0.161085	3.11409	0.652252	8.76723	0.097868	2.0345	3.7921	0.276908
ENSSSCG00000035582	GIPC2	YES	4.86e-05	2.10832	0.09231	0.342539	0.203228	1.78777	0.434417	5.02197	0.637088	1.32846	2.31515	0.341761
ENSSSCG00000012591	AMOT	YES	4.94e-05	9.90736	0.545415	1.56916	1.02018	5.10121	1.55276	14.8256	0.507991	4.37871	7.85084	0.906588
ENSSSCG00000033010	AHNAK	YES	7.05e-05	3.3095	0.420101	2.88598	1.7063	3.91883	1.59529	11.0293	2.83057	3.46198	5.2859	1.63807
ENSSSCG00000014540	FTH1	YES	7.43e-05	77.3719	11.6363	26.7633	9.42767	87.9347	26.4858	63.1285	56.7194	44.9335	63.7996	26.0673
ENSSSCG00000017239	RPL38	YES	8.28e-05	27.4546	2.61921	18.2401	8.95185	38.7375	14.4395	31.4593	9.02337	18.8657	28.9729	8.75847
ENSSSCG00000030849	LOC100623540; RPL39; LOC100525679	YES	9.35e-05	16.8804	1.41817	29.0969	5.8592	47.3321	13.0195	49.8476	13.744	22.1498	35.7893	8.51023
ENSSSCG00000006267	PCMTD1	YES	9.62e-05	6.32134	0.648108	2.75083	1.1343	2.56446	1.30523	5.54357	1.82226	2.76126	4.29505	1.22747
ENSSSCG00000036702	ACTN1	YES	0.000100696	3.79245	0	1.63646	0.481718	1.87464	0.618645	11.258	1.41088	2.6341	4.64039	0.62781
ENSSSCG00000006063	PABPC1	YES	0.00011451	20.7564	3.23028	11.9459	11.6928	22.8432	9.94177	40.0258	10.9615	16.4247	23.8928	8.95658
ENSSSCG00000020725	ERBB3	YES	0.000118128	2.54638	0.6007	3.01935	0.710268	4.58078	1.24151	3.78129	0.716823	2.14964	3.48195	0.817325
ENSSSCG00000006370	TSTD1	YES	0.000120181	8.81973	0	5.85984	0	1.38547	0	14.2705	0	3.79194	7.58388	0
ENSSSCG00000003691	MYL12A	YES	0.000123172	13.4593	0.999756	4.73331	2.39296	8.95526	3.24684	21.0434	0.424108	6.90687	12.0478	1.76591
ENSSSCG00000005656	SET	YES	0.00014157	8.2899	2.08706	6.71248	1.06315	8.92324	3.84066	19.5768	1.8123	6.5382	10.8756	2.20079
ENSSSCG00000007520	GNAS	YES	0.000151977	11.6398	1.10449	5.29449	3.27599	3.0419	1.0257	20.5759	2.66771	6.07825	10.138	2.01847
ENSSSCG00000016061	MYO1B	YES	0.00016334	6.44903	0.899149	2.63593	0.657518	6.76441	2.45948	16.6036	0.473658	4.61785	8.11325	1.12245
ENSSSCG00000022900	SUPT16H	YES	0.000197208	2.22778	0.11998	1.29467	0.779637	2.53283	0.55635	4.34951	0.542532	1.55041	2.6012	0.499625
ENSSSCG00000008245	TMSB10	YES	0.00020582	14.661	0.932513	18.3818	1.41535	25.2313	6.87688	26.078	9.02022	12.8246	21.088	4.56124
ENSSSCG00000001075	DEK	YES	0.000219276	3.78653	0	2.79666	0.696502	2.27267	1.27886	2.94031	1.04431	1.85198	2.94904	0.754918
ENSSSCG00000029059	SSRP1	YES	0.000222473	2.65768	0.445783	2.81244	1.36293	4.13432	1.36988	8.92832	1.13206	2.85542	4.63319	1.07766
ENSSSCG00000010313	VCL	YES	0.000249903	3.1454	0.393209	1.52559	0.485861	3.43749	1.36689	7.00289	0.373757	2.21639	3.77784	0.654929
ENSSSCG00000030053	ARCN1	YES	0.000260205	5.22966	1.14635	5.62104	1.90632	12.0207	5.19995	11.8793	1.83875	5.60526	8.68768	2.52284
ENSSSCG00000005006	RPL36AL	YES	0.000260205	3.65452	0.605587	6.03669	3.16856	10.7389	3.21197	12.4088	2.8618	5.33586	8.20973	2.46198
ENSSSCG00000013767	PALM3	YES	0.00026041	1.83062	0	0.584797	0.174179	3.64799	0.258631	3.75577	0	1.2815	2.4548	0.108203
ENSSSCG00000027166	BICD2	YES	0.000268013	4.00466	0.341225	0.891256	0.901666	4.93476	0.995544	12.8086	0.645542	3.19041	5.65983	0.720994
ENSSSCG00000037468	GNE	YES	0.000286712	1.99638	0.152075	0.62542	0.219197	2.38207	0	2.66228	0	1.00468	1.91654	0.092818
ENSSSCG00000009414	ZC3H13	YES	0.000287732	2.08978	0.378038	1.88303	1.18549	3.59248	0.988922	4.12331	0.572209	1.85166	2.92215	0.781166
ENSSSCG00000030197	CD2AP	YES	0.000304079	1.58798	0.131079	1.61221	0.398006	2.65652	0.803871	6.49458	0.645323	1.7912	3.08782	0.49457
ENSSSCG00000016057	STAT1	YES	0.000304079	2.94911	0.079415	2.64298	0.920033	1.66647	0.353902	1.58301	0.66889	1.35798	2.21039	0.50556
ENSSSCG00000009772	TMED2	YES	0.000320663	4.08433	0	0.850331	0.529943	3.88776	0.217009	6.86744	0.5757	2.12656	3.92246	0.330663
ENSSSCG00000000252	KRT8	YES	0.000321806	11.8534	0.839428	3.26761	1.23829	9.99439	2.77998	22.9524	0.7603	6.71073	12.017	1.4045
ENSSSCG00000021825	RPS21; LOC100518848	YES	0.000335628	20.5186	2.04781	52.6618	11.4906	36.8527	13.3955	32.5183	12.114	22.6999	35.6379	9.76197
ENSSSCG00000024009	CAMK2N1	YES	0.000335967	3.76991	0	2.934	0.466686	5.82255	1.7618	14.3679	0.380612	3.68793	6.72358	0.652275
ENSSSCG00000031924	NKX3-1	YES	0.000350482	2.13212	0	0.575956	0.258049	2.50438	0.335178	4.24189	0.503573	1.31889	2.36359	0.2742
ENSSSCG00000034293	ARL4C	YES	0.000350482	0.74626	0	1.02452	0	2.5796	0	5.11094	0.16245	1.20297	2.36533	0.0406125
ENSSSCG00000006033	EIF3E	YES	0.000364326	6.25137	1.26287	4.76487	3.27361	5.30126	1.91589	10.1387	3.06127	4.49624	6.61406	2.37841
ENSSSCG00000022081	PHLDB2	YES	0.000370759	0.916161	0	0.482176	0.11791	2.08159	1.7908	3.10903	0.248889	1.09332	1.64724	0.539401
ENSSSCG00000026529	LOC100515984; NUDT11	YES	0.000390454	2.90679	0	1.26616	0.404784	1.35971	0	9.54186	0	1.93491	3.76863	0.101196
ENSSSCG00000002045		YES	0.000402885	10.2762	0.331816	7.03917	1.51154	8.25445	2.68281	25.2925	0.677163	7.00821	12.7156	1.30083
ENSSSCG00000028996	ALDH1A1	YES	0.000411892	8.43619	0.580138	1.2186	0.732719	5.70458	0.833266	9.36873	0.056877	3.36639	6.18203	0.55075
ENSSSCG00000021977	GPD1L	YES	0.00042261	4.19292	0	0.566658	0.110683	3.56884	1.50159	6.37066	0.545351	2.10709	3.67477	0.539405
ENSSSCG00000036350	HNRNPA2B1	YES	0.000450966	19.2718	2.12083	14.4857	9.41932	25.3183	13.796	22.139	5.97326	14.0655	20.3037	7.82735
ENSSSCG00000033368	ATP5MC2	YES	0.000450966	8.86642	0	3.85546	1.46686	12.9139	3.23269	18.7511	2.08296	6.39617	11.0967	1.69563
ENSSSCG00000039885	PTP4A2	YES	0.000463412	5.55409	0.209596	2.86301	1.17467	3.45725	1.44911	9.53687	1.03378	3.1598	5.35281	0.966788
ENSSSCG00000000600	EPS8	YES	0.000471381	2.09771	0	0.824068	0.045628	1.74126	0.697163	4.43162	0.34415	1.2727	2.27366	0.271735
ENSSSCG00000015612	IRF6	YES	0.000471862	1.38645	0	0.771852	0.296621	0.892883	0.150874	4.70894	0.116031	1.04046	1.94003	0.140881
ENSSSCG00000011662	COPB2	YES	0.000488196	3.37319	0.306229	1.17074	0.754694	2.47514	0.52098	3.87892	0.434202	1.61426	2.7245	0.504026
ENSSSCG00000016998	NPM1	YES	0.000518018	2.88527	0.265584	3.52064	2.91877	3.58634	0.549842	8.21452	3.19133	3.14154	4.55169	1.73138
ENSSSCG00000004478	MYO6	YES	0.000553205	2.78363	0.56464	4.13472	1.80226	2.54859	1.13538	3.10302	1.23798	2.16378	3.14249	1.18507
ENSSSCG00000031773	CXH4orf3	YES	0.000591547	2.1567	0.19504	0.97505	0.320968	3.09715	0.454373	5.54	0.39538	1.64183	2.94222	0.34144
ENSSSCG00000026517	CALML4	YES	0.000594002	2.84758	0	3.31121	0.173314	4.63092	0.349852	1.97694	0	1.66123	3.19166	0.130792
ENSSSCG00000033733	HMGN1	YES	0.000629124	6.41744	0.777348	3.45641	1.25791	5.85708	2.60302	20.3779	2.54197	5.41114	9.02721	1.79506
ENSSSCG00000017360	UBTF	YES	0.000629124	1.49935	0.21766	0.771939	0.140271	1.60422	0.373501	2.98529	0.686953	1.0349	1.7152	0.354596
ENSSSCG00000006081	RPL30	YES	0.00063158	6.83307	0.286295	9.38761	1.51087	15.8396	6.73932	15.4927	2.16118	7.28133	11.8882	2.67442
ENSSSCG00000031262	TXNIP	YES	0.00063714	9.64675	0.921726	0.944194	0.965227	6.27919	0.741603	12.6743	0.523698	4.08708	7.3861	0.788064
ENSSSCG00000016828	DNAJC21	YES	0.000712063	3.91834	1.05221	13.1139	3.89016	7.71563	3.2085	4.33847	2.37581	4.95163	7.2716	2.63167
ENSSSCG00000009303	RPL21	YES	0.000771192	6.33685	0.093615	8.67147	4.95761	12.4064	6.25516	14.416	1.83	6.87089	10.4577	3.2841
ENSSSCG00000029256	AKR1A1	YES	0.000771192	2.15588	0	1.04868	0.256147	1.13065	0	8.795	0.172437	1.69485	3.28255	0.107146
ENSSSCG00000006156	TPD52	YES	0.000790951	1.42934	0.2886	0.973198	0.298723	2.60543	0.444015	5.26844	0.837666	1.51818	2.5691	0.467251
ENSSSCG00000004870	CNDP2	YES	0.00082217	5.92477	0.212221	1.3858	1.07662	2.97147	0.70232	6.83261	0.618817	2.46558	4.27866	0.652495
ENSSSCG00000000576	LDHB	YES	0.000823519	11.2969	0	4.4061	0.810637	6.11458	2.64006	9.32992	0.803125	4.42516	7.78687	1.06346
ENSSSCG00000013300	EHF	YES	0.000828191	4.95899	0.342341	2.64133	1.67839	1.18315	1.02052	10.1773	0.6884	2.8363	4.74019	0.932411
ENSSSCG00000000405	ATP5F1B	YES	0.000833684	7.19088	0.627247	3.02517	0.96795	4.16814	2.06423	11.3225	2.6695	4.00446	6.42668	1.58223
ENSSSCG00000013591	TIMM44	YES	0.000858108	24.3591	0.213599	32.1392	0.354481	44.201	0.230114	0.370403	1.29253	12.8951	25.2674	0.522681
ENSSSCG00000004612	RAB27A	YES	0.000876921	1.29596	0	1.28459	0.348004	1.77408	0.21961	7.88655	0	1.6011	3.0603	0.141903
ENSSSCG00000022635	BEX4	YES	0.000917607	8.6944	0	5.3857	0	2.67976	0	3.46397	0.927417	2.64391	5.05596	0.231854
ENSSSCG00000030309	NDRG2	YES	0.00100876	3.06794	0	1.91361	0.816593	3.42448	0.618114	5.05793	0.022162	1.8651	3.36599	0.364217
ENSSSCG00000000273	PRR13	YES	0.00109198	3.35922	0.183282	3.72021	1.33252	6.04184	1.19106	5.69596	0.619674	2.76797	4.70431	0.831634
ENSSSCG00000020783	SLC41A1	YES	0.00113025	1.37077	0.108245	0.636708	0.263042	1.81057	0.450408	3.25185	0.759165	1.08135	1.76748	0.395215
ENSSSCG00000008634	ATP6V1C2	YES	0.00113235	0.531408	0	0.236943	0	2.56651	0.10841	5.72559	0	1.14611	2.26511	0.0271025
ENSSSCG00000022659	CLTC	YES	0.00116059	4.10636	0.740556	1.54562	1.22419	4.0374	1.4989	8.38504	0.99375	2.81648	4.51861	1.11435
ENSSSCG00000014133	RPS23	YES	0.00117061	10.2118	0	16.2404	2.71054	16.9427	6.59396	27.0742	4.92301	10.5871	17.6173	3.55688
ENSSSCG00000000253	KRT18	YES	0.00119945	8.98581	0.086479	0.546824	0.427896	7.09561	0.87645	6.14941	0.169324	3.04222	5.69441	0.390037
ENSSSCG00000040879	CNBP	YES	0.00123042	3.54823	0.948549	1.80382	1.22385	5.01312	1.62755	7.35361	1.41067	2.86617	4.42969	1.30266
ENSSSCG00000005453	TXN	YES	0.00125551	4.64764	0.251132	4.39802	0.629551	8.35576	0.521755	5.32763	1.59915	3.21633	5.68227	0.750397
ENSSSCG00000006261	TCEA1	YES	0.00125551	3.77208	0	1.12335	0.420863	6.67758	0.511214	4.34842	0.098473	2.119	3.98036	0.257637
ENSSSCG00000013361	SPTY2D1	YES	0.00125551	2.39763	0.085159	0.742707	0.418545	2.06791	0.756109	2.98874	0.129467	1.19828	2.04925	0.34732
ENSSSCG00000011070	MPP7	YES	0.00132833	0.590143	0.075859	0.719042	0.527292	1.9837	0.48202	5.03324	0.788746	1.275	2.08153	0.468479
ENSSSCG00000002847	GPT2	YES	0.00137435	1.40603	0.092525	0.578962	0.222499	1.22212	0.583232	5.00184	0.234136	1.16767	2.05224	0.283098
ENSSSCG00000032942	DAP	YES	0.00148035	4.52743	0.466302	2.08801	0.886445	5.89958	1.68077	12.9943	0.237905	3.5976	6.37734	0.817855
ENSSSCG00000012974	CFL1	YES	0.00148262	4.95114	0.39611	2.84956	3.03906	6.24941	1.62834	10.3294	2.74021	4.02291	6.09489	1.95093
ENSSSCG00000014060	KIAA1191	YES	0.00152159	2.41896	0.188187	1.97845	1.41163	3.15525	1.51835	7.535	1.04005	2.40573	3.77191	1.03955
ENSSSCG00000037621	KIAA1522	YES	0.00158019	4.96173	0.468581	1.14291	0.942603	7.09352	1.99871	10.9436	0.337001	3.48608	6.03543	0.936724
ENSSSCG00000003903	LOC100524873	YES	0.00158398	17.8906	0	11.2771	10.2067	17.8536	0.404018	40.6584	9.90298	13.5242	21.9199	5.12841
ENSSSCG00000014802	NUMA1	YES	0.00160008	7.55083	1.77078	2.44791	2.17861	6.08459	2.38107	17.5941	3.16535	5.39666	8.41936	2.37395
ENSSSCG00000013301	ELF5	YES	0.00165985	11.8068	2.97855	4.2285	4.18764	9.23077	3.91325	36.1454	4.58178	9.63409	15.3529	3.91531
ENSSSCG00000017089	ANXA6	YES	0.00165985	3.54883	0	0.537262	0	1.38981	0.421305	3.35566	0	1.15661	2.20789	0.105326
ENSSSCG00000027573	RPL29	YES	0.00171246	27.7266	2.1846	22.2708	18.2789	65.3899	25.7035	63.7514	4.21953	28.6907	44.7847	12.5966
ENSSSCG00000015823	RAB11FIP1	YES	0.00175566	2.61774	0.110335	1.99732	1.4942	3.98533	1.75934	6.97968	0.87017	2.47676	3.89502	1.05851
ENSSSCG00000009658	BNIP3L	YES	0.00179667	3.59022	0.298958	0.829883	0.711833	3.77153	1.52526	6.57912	0.270116	2.19712	3.69269	0.701542
ENSSSCG00000032129	LOC100516480	YES	0.00180346	3.13731	0	2.16853	0.276189	3.3397	1.28217	9.08388	0.168938	2.43209	4.43236	0.431824
ENSSSCG00000015938	SSB	YES	0.00194218	2.874	0.124357	0.924528	0.831044	1.61845	0.26837	3.01581	0.066511	1.21538	2.1082	0.32257
ENSSSCG00000005078	DAAM1	YES	0.00198363	2.22742	0	1.08534	0.635127	1.76239	0.801309	7.17884	3.68907	2.17244	3.0635	1.28138
ENSSSCG00000028865	SAP18	YES	0.00216812	3.37221	0	2.39011	1.38418	3.90098	1.2329	6.41575	0.796384	2.43656	4.01976	0.853366
ENSSSCG00000004639	USP8	YES	0.00219547	3.20858	0.524958	4.09765	2.57659	3.31834	2.02727	4.41497	1.22286	2.6739	3.75988	1.58792
ENSSSCG00000023326	PNRC2	YES	0.00229902	5.43096	0	2.61437	1.69713	4.74061	1.93405	10.8477	0.925626	3.52381	5.90842	1.1392
ENSSSCG00000014296	VDAC1	YES	0.00240588	2.03457	0.154681	0.790901	0.436499	2.78115	0.65475	5.3615	0.316732	1.56635	2.74203	0.390665
ENSSSCG00000005668	SH3GLB2	YES	0.00241241	2.72781	0.349503	0.622253	0.286318	1.82794	0.434856	4.62096	0.355423	1.40313	2.44974	0.356525
ENSSSCG00000012042	ATP5PO	YES	0.00247281	3.68367	0	1.27641	0.548047	10.2071	1.42796	14.202	1.751	4.13703	7.34231	0.931751
ENSSSCG00000020817	RPS16	YES	0.00256606	18.0829	1.15924	14.1498	18.4823	32.1594	9.9946	52.8868	7.97468	19.3612	29.3197	9.4027
ENSSSCG00000036136	BHLHE40	YES	0.00256606	1.72258	0.366797	1.35412	0.435659	2.92401	0.380979	3.45703	0.85897	1.43752	2.36444	0.510601
ENSSSCG00000017212	SUMO2	YES	0.00297489	5.21599	0.361525	8.43208	6.57174	8.71117	1.74889	13.9489	5.01633	6.25082	9.07703	3.42462
ENSSSCG00000013381	RPS13	YES	0.00297841	21.4145	3.12973	20.8009	6.67217	33.6999	18.5443	37.1745	19.4032	20.1049	28.2724	11.9373
ENSSSCG00000039222	BASP1	YES	0.00305553	6.75493	0.334666	0.559541	0.02511	2.43593	0.749255	5.60641	0	2.05823	3.8392	0.277258
ENSSSCG00000002978	PSP-I; PSP-II	YES	0.00326896	454.426	41.0872	633.341	117.145	877.497	203.729	2315.68	29.2268	584.017	1070.24	97.797
ENSSSCG00000007272	CHMP4B	YES	0.0033098	4.47134	1.29149	2.75375	1.05054	6.24545	0.695064	9.32979	1.70375	3.44265	5.70009	1.18521
ENSSSCG00000013260	MDK	YES	0.0033098	7.33779	0	0.477982	0	0.98537	0	1.79026	0	1.32393	2.64785	0
ENSSSCG00000037131	CLTA	YES	0.00331586	2.75016	0.342886	1.47912	0.805653	2.45138	0.927685	4.40997	0.431516	1.6998	2.77266	0.626935
ENSSSCG00000004570	TPM1	YES	0.0033522	5.46689	0.540921	1.63274	0.136654	4.74528	2.15275	9.20311	0.506077	3.04805	5.262	0.834101
ENSSSCG00000034444	EIF4EBP2	YES	0.0033522	1.595	0.402691	3.21331	1.15997	1.71476	0.482283	6.49393	0.313	1.92187	3.25425	0.589486
ENSSSCG00000002965	ACTN4	YES	0.00364538	3.83063	0.244756	0.665423	0.694276	1.75203	0.84944	6.90831	0.941629	1.98581	3.2891	0.682525
ENSSSCG00000023971	H3-3A	YES	0.00373405	6.0492	0.730733	11.6822	2.33236	8.69619	3.56556	28.3993	5.64706	8.38783	13.7067	3.06893
ENSSSCG00000011618	GATA2	YES	0.00376551	7.37428	1.01283	3.10937	2.19927	6.61941	3.29326	21.4898	1.59157	5.83622	9.64821	2.02423
ENSSSCG00000029518	RIOK3	YES	0.00392179	2.20332	0.323938	2.70182	1.35862	2.20639	0.653826	4.86341	0.329389	1.83009	2.99374	0.666443
ENSSSCG00000037918	ADIRF	YES	0.00393898	15.0455	1.32362	6.51528	1.06733	13.4333	3.28682	17.2464	0.657294	7.32194	13.0601	1.58377
ENSSSCG00000021084	S100A6	YES	0.00404844	12.6536	2.65679	8.75437	1.32887	10.087	2.6381	24.0653	4.7165	8.36257	13.8901	2.83507
ENSSSCG00000005478	POLE3	YES	0.00425495	1.77665	0	1.9455	0	2.00678	0.954369	3.64692	0	1.29128	2.34396	0.238592
ENSSSCG00000014219	CDO1	YES	0.00439531	1.56268	0.141819	1.44335	0.799482	2.24226	1.03302	7.17517	0.293331	1.83639	3.10587	0.566912
ENSSSCG00000004679	SORD	YES	0.00445029	1.86597	0.762224	1.9681	0.950151	3.61147	0.644066	5.44054	0.617575	1.98251	3.22152	0.743504
ENSSSCG00000035090	RAC1	YES	0.00463232	8.34552	0.140328	5.59541	2.36647	10.1867	2.59238	13.1528	2.91541	5.66188	9.32012	2.00365
ENSSSCG00000034598	H2AC20	YES	0.00496514	6.48244	0	5.03305	1.71048	7.13731	1.61099	31.513	2.72993	7.02715	12.5414	1.51285
ENSSSCG00000036907	NMB	YES	0.00496514	2.7034	0	1.35583	0	3.82369	0	2.97662	0	1.35744	2.71488	0
ENSSSCG00000010212	ANK3	YES	0.00501377	3.20314	0.793279	1.5171	0.78357	2.31088	1.02163	8.20795	0.660169	2.31222	3.80977	0.814663
ENSSSCG00000013522	SAFB	YES	0.00516123	1.77534	0.222306	1.39751	0.638591	1.87196	0.557247	2.96826	0.417883	1.23114	2.00327	0.459007
ENSSSCG00000007849	CRYM	YES	0.00518483	5.74519	0.283652	2.0013	3.37626	9.59595	1.23506	26.1605	0.379121	6.09713	10.8757	1.31852
ENSSSCG00000027224	PCBP1	YES	0.00518483	4.89912	0.320098	3.20276	1.29774	4.80798	1.97401	5.4282	1.75425	2.96052	4.58451	1.33652
ENSSSCG00000017804	ABR	YES	0.00523398	2.17245	0.679261	1.61649	0.418243	2.85977	1.04569	6.19212	0.783263	1.97091	3.21021	0.731614
ENSSSCG00000005029	RTRAF	YES	0.00527139	5.06503	0	5.67239	0	5.84804	1.77812	10.467	3.52272	4.04416	6.76311	1.32521
ENSSSCG00000002980	AWN	YES	0.00553713	133.378	9.59665	88.9956	24.8053	228.875	62.6137	396.814	6.72847	118.976	212.016	25.936
ENSSSCG00000037510	DYNLRB1	YES	0.00556722	5.93508	1.22527	4.20708	0.606679	9.52689	0.19271	8.95002	0.051027	3.83684	7.15477	0.518922
ENSSSCG00000035209	ANP32E	YES	0.00557878	1.25425	0.164505	0.902131	0.335027	2.13476	0.335816	2.81641	0.482313	1.05315	1.77689	0.329415
ENSSSCG00000015353	SCIN	YES	0.00562884	6.32545	0.511684	2.92065	2.25331	5.64431	3.42279	12.3043	1.85621	4.40484	6.79868	2.011
ENSSSCG00000035297	ISG12(A)	YES	0.00582071	13.6647	0.231351	0.857783	0.370317	2.65361	1.27968	6.33342	0.701447	3.26154	5.87738	0.645698
ENSSSCG00000028423	RBBP4	YES	0.00625073	5.35113	0.194654	2.35785	2.16086	4.35089	0.889189	13.8575	1.08145	3.78044	6.47934	1.08154
ENSSSCG00000016174	FN1	YES	0.00664182	6.70754	0.320084	3.95483	2.24253	6.87787	2.12915	21.0098	0.661887	5.48796	9.63751	1.33841
ENSSSCG00000010648	CCDC186	YES	0.00689645	4.49049	0.385444	4.0037	2.75562	4.66681	3.71763	6.15306	1.81889	3.49895	4.82851	2.16939
ENSSSCG00000026990	FAM162A	YES	0.00709408	1.87054	0	0.69534	0	3.73229	0	7.73337	0	1.75394	3.50788	0
ENSSSCG00000013029	TRMT112	YES	0.00713338	0.389807	0	1.67822	0.259667	2.65214	0	7.16639	0.320924	1.55839	2.97164	0.145148
ENSSSCG00000025117	ATN1	YES	0.00718161	3.18899	0.402429	2.17872	1.98547	2.65035	1.17525	3.77329	1.1933	2.06848	2.94784	1.18911
ENSSSCG00000004945	RPL4	YES	0.00748092	8.87869	0	8.59821	2.12088	13.2005	3.19009	23.7612	1.03433	7.59799	13.6097	1.58633
ENSSSCG00000040608	AKR1B1	YES	0.00749524	11.2688	0.843624	4.7626	7.02678	18.0746	6.70409	23.9391	7.24702	9.98333	14.5113	5.45538
ENSSSCG00000002307	ERH	YES	0.00759854	6.38746	0.324047	5.44479	2.41798	7.01721	1.88061	10.5574	3.91803	4.74344	7.35172	2.13516
ENSSSCG00000026196	FAM13A	YES	0.00769124	3.80872	0.294083	1.19564	1.68086	2.30448	0.828926	8.45748	1.95212	2.56529	3.94158	1.189
ENSSSCG00000013509	CHAF1A	YES	0.00769124	1.81161	0.6337	3.90845	2.19215	5.04779	0.8522	3.00164	1.20118	2.33109	3.44237	1.21981
ENSSSCG00000022159	FNDC3A	YES	0.00791955	3.53118	0.706749	2.21435	2.16091	4.25274	1.67277	7.92628	1.01379	2.93485	4.48114	1.38855
ENSSSCG00000017024	CCNG1	YES	0.00824165	4.10057	0	1.91932	1.89224	5.49322	1.74628	11.0948	1.78614	3.50407	5.65197	1.35617
ENSSSCG00000013554	TRIP10	YES	0.00827693	2.12695	0	0.583542	0.354056	2.33402	0.184173	1.9909	0.443547	1.00215	1.75885	0.245444
ENSSSCG00000012523	TCEAL8	YES	0.00828319	1.25684	0	3.20842	0.30788	3.47879	0.950188	5.27919	0	1.81016	3.30581	0.314517
ENSSSCG00000004687	B2M	YES	0.00877893	99.8241	2.31331	42.353	0.359461	16.5346	1.45019	20.59	21.5867	25.6264	44.8254	6.42742
ENSSSCG00000005273	OSTF1	YES	0.00902828	1.71849	0	1.26052	0	1.83479	0.263145	2.97989	0.651247	1.08851	1.94842	0.228598
ENSSSCG00000021236	PMM2	YES	0.00932776	3.07701	0.220815	1.19849	0.597312	1.3686	0.740316	3.13193	0.758093	1.38657	2.19401	0.579134
ENSSSCG00000002470	DDX24	YES	0.00940028	2.81253	0.691887	2.00599	1.44045	3.23778	1.29735	5.21491	1.22596	2.24086	3.3178	1.16391
ENSSSCG00000026981	MRPS6	YES	0.00996168	2.44992	0	0.583371	0.751012	2.96714	0.265134	8.5695	0.160161	1.96828	3.64248	0.294077
ENSSSCG00000006610	S100A11	YES	0.0103313	15.3896	1.017	9.60463	0.472582	5.20234	1.23091	26.6676	0.578156	7.52035	14.216	0.824662
ENSSSCG00000014367	SLC35A4	YES	0.0104842	3.97546	2.63539	6.67651	0	8.26124	0	4.94735	0	3.31199	5.96514	0.658847
ENSSSCG00000034086	ATP5F1C	YES	0.0104842	5.92119	0.80805	4.38186	2.51725	1.79147	0.232335	5.97335	0.619441	2.78062	4.51697	1.04427
ENSSSCG00000009412	LCP1	YES	0.0106228	1.50951	0.347096	1.39826	0.496412	1.34702	0.574711	2.29699	1.12722	1.13715	1.63795	0.636361
ENSSSCG00000010203	HNRNPF	YES	0.010716	5.05567	0.463717	1.39769	1.99032	3.75354	1.52736	6.36875	0.983908	2.69262	4.14392	1.24133
ENSSSCG00000017624	CUEDC1	YES	0.0107672	2.69055	0.180617	1.14083	0.816389	2.53039	0.889693	4.11848	1.41394	1.72261	2.62006	0.82516
ENSSSCG00000021229	MAT2B	YES	0.0107718	4.71333	0.447008	2.28652	1.346	2.05283	1.09158	7.80945	1.83432	2.69763	4.21553	1.17973
ENSSSCG00000036157	BARX2	YES	0.0107718	0.740415	0	0.790122	0.222699	2.34879	0.227525	4.03246	0.843857	1.15073	1.97795	0.32352
ENSSSCG00000017014	PANK3	YES	0.0107718	1.2127	0	0.545975	0.301969	1.21565	0.682922	3.77667	0.527919	1.03298	1.68775	0.378202
ENSSSCG00000000290	COPZ1	YES	0.0113964	0.936314	0	0.839929	0.27178	2.74397	0.314475	4.94344	0.113104	1.27038	2.36591	0.17484
ENSSSCG00000036723	EMP1	YES	0.0113964	2.29567	0	0.787525	0.642241	3.06816	0.388869	1.32765	0.241796	1.09399	1.86975	0.318226
ENSSSCG00000021947	AQN-1	YES	0.0114379	46.4474	8.04093	115.166	12.5652	143.961	30.7374	377.728	3.46271	92.2635	170.825	13.7016
ENSSSCG00000003798	SERBP1	YES	0.0114381	5.14843	0.342337	0.969339	0.845589	6.92079	1.82883	7.46001	0.248374	2.97046	5.12464	0.816284
ENSSSCG00000009858	FBXO21	YES	0.0116935	1.00072	0.201027	0.974436	0.33535	1.57853	0.856948	2.89201	0.396883	1.02949	1.61142	0.447552
ENSSSCG00000004653	SECISBP2L	YES	0.0130424	3.13955	0.403407	0.591092	0.646043	2.69631	1.12193	7.12197	0.611012	2.04141	3.38723	0.695597
ENSSSCG00000000084	ATF4	YES	0.0137594	1.54136	0.151606	0.827558	1.01521	1.8305	0.354966	3.80377	1.33659	1.35769	2.00079	0.714593
ENSSSCG00000029121	WFDC10A	YES	0.0140024	5.3281	0.579807	4.84504	1.90832	1.75134	0	4.37662	0	2.34865	4.07528	0.622032
ENSSSCG00000007147	HSPA12B	YES	0.0147098	0.415261	0.192771	0.946351	6.92743	0.41961	6.10818	0.408135	2.10312	2.19011	0.547339	3.83288
ENSSSCG00000002707	GABARAPL2	YES	0.0148138	4.55852	0	1.19907	0.742881	3.99704	0.92222	8.62758	0.899743	2.61838	4.59555	0.641211
ENSSSCG00000033041	GNAS	YES	0.0149195	0.826269	0	5.1227	2.2113	7.65043	1.28503	0	0	2.13697	3.39985	0.874082
ENSSSCG00000002846	DNAJA2	YES	0.0149266	1.24247	0.205957	0.284482	0.520244	1.09362	0.12767	5.39577	0.277958	1.14352	2.00408	0.282957
ENSSSCG00000016989	RPL26L1	YES	0.0155366	4.22367	0.453632	4.96427	2.36754	7.5362	0	11.0704	1.95072	4.0708	6.94862	1.19297
ENSSSCG00000017251	SOX9	YES	0.0155475	1.70862	0.148021	0.613844	0.364568	1.16156	0.435466	5.07329	0.086732	1.19901	2.13933	0.258697
ENSSSCG00000035622	UBE2D3	YES	0.0159017	2.4166	1.13777	3.36178	3.8507	9.53911	2.39982	13.5014	2.63428	4.85518	7.20471	2.50565
ENSSSCG00000032557	LDHB	YES	0.0164911	1.47782	0	1.08063	0.640078	3.31362	0	2.96156	0	1.18421	2.20841	0.16002
ENSSSCG00000010606	SLK	YES	0.016702	2.59284	0.152718	1.06168	0.314734	0.980599	0.917179	2.76029	0.107495	1.11094	1.84885	0.373031
ENSSSCG00000013736	PRDX2	YES	0.0167752	14.589	1.01253	1.33483	0.749334	1.77286	0.36963	12.8846	0.28599	4.12485	7.64532	0.604372
ENSSSCG00000025092	CDK4	YES	0.0170439	1.72078	0	0.576073	0	1.60058	0.677966	4.63363	0	1.15113	2.13277	0.169491
ENSSSCG00000023604	LAP3	YES	0.0171059	3.5416	0.697119	1.41338	0.77958	3.95566	0.580811	2.83657	0.118828	1.74044	2.9368	0.544085
ENSSSCG00000029478	CUL4B	YES	0.017469	1.62991	0.101744	1.70065	1.12107	2.47842	1.59161	3.50697	1.02727	1.64471	2.32899	0.960424
ENSSSCG00000027806	SAMHD1	YES	0.0174965	3.71577	0.124306	2.07562	1.96739	2.97956	1.55415	9.15026	2.34777	2.98935	4.4803	1.4984
ENSSSCG00000027529	BIRC3	YES	0.0175425	5.03128	0	0.815995	1.00256	4.93922	1.50069	3.18276	1.19901	2.20894	3.49231	0.925565
ENSSSCG00000026386	SLC30A2	YES	0.0175425	2.11789	0	0.222102	0.486387	2.39904	0.201884	5.79471	0.342269	1.44553	2.63343	0.257635
ENSSSCG00000037144	CDKN1B	YES	0.0175425	2.29882	0	0.568621	0	1.63577	0.346899	4.57991	0.421938	1.2315	2.27078	0.192209
ENSSSCG00000038507	RPS29	YES	0.0176355	13.2356	4.76156	15.1472	1.5544	26.4642	10.8198	16.8737	2.13905	11.3744	17.9302	4.81869
ENSSSCG00000032320	TCIM	YES	0.0183714	7.15559	0	1.80835	0	10.7802	0	3.43279	0	2.89711	5.79422	0
ENSSSCG00000040296	EHHADH	YES	0.0183714	2.78596	0.510085	2.11395	0.083266	0.75975	0.085468	4.15882	0.103956	1.32516	2.45462	0.195694
ENSSSCG00000012525	BEX1	YES	0.0186366	5.80138	2.77859	7.91646	0.828394	7.85396	1.83834	13.4522	0.452498	5.11523	8.756	1.47446
ENSSSCG00000016872	HMGCS1	YES	0.0186366	2.32245	0.20423	0.801584	0.646719	2.85385	1.42713	6.40203	0.348998	1.87587	3.09498	0.65677
ENSSSCG00000049384		YES	0.0190747	12.5966	0	10.2988	2.72576	2.62891	1.23927	22.3013	1.33133	6.64024	11.9564	1.32409
ENSSSCG00000029954	THRAP3	YES	0.0193212	4.02355	0.135384	1.7102	2.46004	3.60839	1.96234	8.53658	0.921066	2.91969	4.46968	1.36971
ENSSSCG00000010211	CCDC6	YES	0.0203211	1.43755	0.409358	1.05793	0.599472	1.77002	0.761217	4.18779	0.893292	1.38958	2.11333	0.665835
ENSSSCG00000002131	RNASE12	YES	0.0203686	6.3444	0	1.40715	1.38587	8.58961	1.15312	7.7325	0	3.32658	6.01842	0.634748
ENSSSCG00000026617	EIF2S2	YES	0.0211815	2.3586	0	1.53346	2.14723	3.45451	0.477552	5.74535	1.51533	2.154	3.27298	1.03503
ENSSSCG00000013174	CTNND1	YES	0.0212527	3.66669	0.458453	1.99018	1.0189	2.02237	1.065	9.09116	0.717257	2.50375	4.1926	0.814904
ENSSSCG00000030260	PFN2	YES	0.0214441	7.77738	0.500814	2.28145	1.88941	11.9477	4.65089	11.2779	0.581461	5.11337	8.32109	1.90564
ENSSSCG00000016956	MAST4	YES	0.0214913	1.35619	0.217096	0.201382	0.274296	1.3661	0.29954	4.18905	0.110949	1.00183	1.77818	0.22547
ENSSSCG00000030095	ZBTB16	YES	0.0217871	1.72953	0.003247	1.01293	0.528964	1.96333	0.896378	3.62621	0.437949	1.27482	2.083	0.466634
ENSSSCG00000040294	LOC100512195	YES	0.0219164	4.56256	0	0.497229	0.662813	1.06395	0.309803	4.38549	0.399758	1.4852	2.62731	0.343093
ENSSSCG00000031449	SLC27A5	YES	0.0222684	3.31502	0.435712	0	13.0833	0	14.058	0	4.78339	4.45943	0.828755	8.09011
ENSSSCG00000032730		YES	0.0224779	1.38393	3.55741	0	1.35938	0	2.03064	0	3.04348	1.42186	0.345983	2.49773
ENSSSCG00000010493	PDLIM1	YES	0.0226571	1.60778	0.106074	1.91947	0.282166	1.81853	1.20263	5.4383	0	1.54687	2.69602	0.397716
ENSSSCG00000011893	COX17	YES	0.0233892	5.54987	1.75529	8.07871	2.24907	14.7066	4.37295	15.1932	3.786	6.96146	10.8821	3.04083
ENSSSCG00000040275	HEBP1	YES	0.0233892	4.37765	0	1.99141	2.4398	6.58515	1.73717	11.0348	0.477735	3.58046	5.99725	1.16368
ENSSSCG00000026863	FARP1	YES	0.0233892	3.09559	0.186754	1.49297	2.01457	2.66233	1.18169	5.97126	0.539894	2.14313	3.30554	0.980728
ENSSSCG00000001966	ARHGAP5	YES	0.0233892	2.81672	0.400349	1.49455	1.17491	2.66079	2.03072	3.98207	0.787366	1.91843	2.73853	1.09834
ENSSSCG00000006777	RHOC	YES	0.0241354	18.0787	0.854236	6.28866	8.05213	15.259	8.23136	25.5859	7.34466	11.2118	16.3031	6.1206
ENSSSCG00000005055	LGALS3	YES	0.0241354	1.20485	0.181046	0.678969	0.149822	2.63387	1.4508	2.12627	0.781835	1.15093	1.66099	0.640875
ENSSSCG00000015576	TPR	YES	0.0244528	2.51459	0.511884	0.762689	0.70877	1.02027	0.484067	4.00978	0.458953	1.30888	2.07683	0.540919
ENSSSCG00000006740	ATP1A1	YES	0.024729	7.76033	0.418407	1.36552	1.75241	5.06008	2.35971	3.7864	1.5122	3.00188	4.49308	1.51068
ENSSSCG00000010576	NOLC1	YES	0.0254134	2.91601	0.066432	0.529608	0.351746	1.45133	1.07022	4.80161	0.137844	1.4156	2.42464	0.406561
ENSSSCG00000001025	DSP	YES	0.025682	1.49633	0.285194	1.04014	0.605404	2.24111	1.46989	4.63313	0.520652	1.53648	2.35268	0.720285
ENSSSCG00000017445	LOC100515166	YES	0.0257238	7.56334	0.506922	5.10931	1.33514	10.1259	0.138635	0	0.323405	3.13783	5.69963	0.576025
ENSSSCG00000024313	NDUFA4	YES	0.0261261	1.76103	0.504268	2.60365	0	5.9458	0.581009	9.76568	0.38877	2.69378	5.01904	0.368512
ENSSSCG00000007970	POLR3K	YES	0.0261306	1.82331	0.053097	0.734081	0.393782	0.775727	0.40181	3.61161	0.659004	1.05655	1.73618	0.376923
ENSSSCG00000023886	RPA3	YES	0.0266909	1.95607	0	1.27142	0.198038	5.29713	0.379912	1.07905	0	1.2727	2.40092	0.144487
ENSSSCG00000027017	NR1D2	YES	0.0279356	1.30686	0.207437	1.17547	1.3021	1.96631	0.572121	3.99634	0.324989	1.35645	2.11124	0.601662
ENSSSCG00000028973	PHACTR4	YES	0.0279398	2.77531	0.215817	1.32505	1.81111	2.78912	1.13615	8.22814	0.830302	2.38887	3.7794	0.998345
ENSSSCG00000024655	PHB2	YES	0.0279741	0.759519	0	0.973724	0	6.52703	0.411582	2.68999	0.908505	1.53379	2.73757	0.330022
ENSSSCG00000036220	CTXN1	YES	0.0285324	27.0099	132.174	10.5147	75.6842	23.1903	187.879	90.6513	129.629	84.5915	37.8416	131.341
ENSSSCG00000016668	PDE1C	YES	0.0288246	0.523504	0	0.621105	0.209088	2.05883	0.709704	2.82179	1.71222	1.08203	1.50631	0.657753
ENSSSCG00000006060	GRHL2	YES	0.0291443	1.53283	0.106485	0.571211	0.903984	1.69455	0.531804	4.94088	0.317952	1.32496	2.18487	0.465056
ENSSSCG00000012642	STAG2	YES	0.0291485	1.92603	0.243429	0.594652	0.763779	1.62844	0.678976	3.59707	0.526365	1.24484	1.93655	0.553137
ENSSSCG00000005096	HIF1A	YES	0.0292215	8.69247	0.890373	0.299826	0.762873	4.66465	1.63153	13.1694	1.26039	3.92144	6.70659	1.13629
ENSSSCG00000014252	PRRC1	YES	0.0297192	1.7057	0.236754	0.429685	0.256257	2.20188	1.23587	4.87879	0.519539	1.43306	2.30401	0.562105
ENSSSCG00000011237	PDCD6IP	YES	0.0297192	1.95026	0.043866	0.49138	0.430292	1.55438	0.934353	3.46339	1.03985	1.23847	1.86485	0.612089
ENSSSCG00000016604	WASL	YES	0.0299354	1.3508	0.120751	1.15785	0.797947	1.34858	0.759424	3.04646	0.378327	1.12002	1.72592	0.514112
ENSSSCG00000029003	LOC100739087	YES	0.0299854	5.85158	0.424711	5.25517	2.90522	9.29733	2.66275	22.4677	0	6.10806	10.7179	1.49817
ENSSSCG00000041367		YES	0.0308479	3.68866	0.127262	13.7686	4.01201	7.14584	4.92706	6.72774	1.58737	5.24806	7.8327	2.66342
ENSSSCG00000016077	HSPD1	YES	0.0309676	2.41502	0.51332	2.97662	0.933629	1.85899	1.20335	5.73663	0.636027	2.0342	3.24682	0.821583
ENSSSCG00000007669	GNB2	YES	0.0309676	2.7043	0	0.313861	0	2.05622	1.84044	5.86696	0	1.59772	2.73534	0.460109
ENSSSCG00000039658	FAM107B; CDNF	YES	0.0309676	1.53403	0.208353	0.663688	0.294461	0.99304	0.533497	4.06063	0.45426	1.09275	1.81285	0.372643
ENSSSCG00000017498	PPP1R1B	YES	0.0310819	2.27507	0.128109	1.87186	0.555669	1.99702	0.604137	1.9596	0.271711	1.2079	2.02589	0.389907
ENSSSCG00000003520	CDC42	YES	0.0312072	2.77202	0.798267	3.08367	1.67172	3.91426	1.44357	9.05047	1.37293	3.01336	4.7051	1.32162
ENSSSCG00000029257	LOC396905	YES	0.0315798	13.217	0.460874	8.88792	4.0767	20.6227	7.48811	45.0928	0.319347	12.5207	21.9551	3.08626
ENSSSCG00000022820		YES	0.0315798	2.03786	0.167151	1.39249	0.269644	1.75786	0.285989	2.42404	0.323164	1.08228	1.90306	0.261487
ENSSSCG00000039071	CLIC1	YES	0.0323479	2.68568	0	2.50172	1.03396	2.13296	1.61653	8.59041	0.592204	2.39418	3.97769	0.810675
ENSSSCG00000039307	H2AJ	YES	0.0332291	6.82711	0	1.55023	1.34498	9.16991	2.8135	15.4608	1.70242	4.85862	8.25201	1.46523
ENSSSCG00000020876	RTL5	YES	0.0339575	4.73341	1.29558	4.4384	0.408239	7.80737	3.35482	3.08918	0.629078	3.21951	5.01709	1.42193
ENSSSCG00000037869	NDUFA5	YES	0.0344566	3.66318	0.671968	1.92291	1.89	2.68839	0	1.92073	0	1.59465	2.5488	0.640493
ENSSSCG00000009216	SPP1	YES	0.0353159	13.7084	0.359453	12.6912	2.32445	15.7323	1.46696	1.24109	7.27131	6.84939	10.8432	2.85554
ENSSSCG00000031023		YES	0.0353159	8.43466	0	1.59099	0.09044	3.34836	1.69544	2.46585	0	2.20322	3.95997	0.44647
ENSSSCG00000004963	ANP32A	YES	0.0353159	1.98941	0	2.25033	0.515629	1.87183	0.865439	2.82127	1.40633	1.46503	2.23321	0.696848
ENSSSCG00000039244	PHYH	YES	0.0384977	3.70086	0.377296	0.492212	0	1.82105	0.471638	3.65031	0.374792	1.36102	2.41611	0.305932
ENSSSCG00000005247	TJP2	YES	0.0388886	1.51464	0.345878	0.749385	1.03532	1.60211	0.525525	6.76593	0.387078	1.61573	2.65802	0.57345
ENSSSCG00000007216	DEFB115	YES	0.0389546	10.9085	0	2.38614	0.584294	13.1147	2.61117	2.06744	1.49509	4.14591	7.11919	1.17264
ENSSSCG00000017957	EIF4A1	YES	0.0389844	3.18192	0.855094	4.19655	1.98243	12.4468	4.24293	5.13846	0.918625	4.12036	6.24094	1.99977
ENSSSCG00000008664	LRATD1	YES	0.0416987	3.15696	0.599617	0.506959	0.445958	2.51378	0.907315	5.62642	0.187657	1.74308	2.95103	0.535137
ENSSSCG00000004785	SRP14	YES	0.0426972	6.6585	0.070751	0.624105	0.261564	1.43598	3.13899	7.12914	0.625235	2.49303	3.96193	1.02413
ENSSSCG00000021439	CCDC66	YES	0.0427156	2.43348	0.164901	4.79659	2.04525	3.92208	2.44855	2.34552	1.64309	2.47493	3.37442	1.57545
ENSSSCG00000033684	CD79A	YES	0.0443018	2.33929	0	6.98236	2.14387	8.6377	4.04465	4.56301	2.85117	3.94526	5.63059	2.25992
ENSSSCG00000022932	SNW1	YES	0.0468897	2.3566	0	1.44287	1.10402	1.56709	0.380753	2.61409	0.452825	1.23978	1.99516	0.4844
ENSSSCG00000004621	MYO5C	YES	0.0473953	2.06483	0.307232	1.32572	1.36205	1.53972	0.989532	4.70642	0.762485	1.63225	2.40917	0.855325
ENSSSCG00000037245	HNRNPDL	YES	0.0475002	2.49498	0.354494	1.42732	1.63251	3.18049	1.51436	5.54714	1.16249	2.16422	3.16248	1.16597
ENSSSCG00000017566	ACSF2	YES	0.0487905	1.41793	0.75901	0.454793	0.211042	2.43493	0.819148	10.1355	0.043088	2.03442	3.61078	0.458072
ENSSSCG00000010723	ACADSB	YES	0.0487905	2.10323	0	1.01896	0.539566	1.3213	0.920488	5.18224	0.455844	1.4427	2.40643	0.478974
ENSSSCG00000039186	RAB25	YES	0.049098	1.188	0	2.18531	0	2.16154	1.46407	3.30038	0	1.28741	2.20881	0.366019
ENSSSCG00000003875	TTC39A	YES	0.0493636	0.865317	0	0.988461	0.711327	1.93924	0.604756	3.88439	0	1.12419	1.91935	0.329021
ENSSSCG00000021337	PRM1	NO	0.978612	3983.28	3496.41	6326.21	6655.84	6917.44	7140.91	5015.49	5820.12	5669.46	5560.61	5778.32
ENSSSCG00000017413	HSPB9	NO	0.923531	2919.91	2183.49	4263.11	5775.64	4607.8	4486.25	2607.05	4117.76	3870.13	3599.47	4140.78
ENSSSCG00000027091	OAZ3	NO	0.850818	1638.02	1395.5	2211.41	3270.56	2833.6	2707.48	1308.93	2032.06	2174.7	1997.99	2351.4
ENSSSCG00000046822	C10orf62	NO	0.965654	1568.69	1177.97	2238.25	3017.59	2559.01	2516.41	1547.14	2175.37	2100.05	1978.27	2221.83
ENSSSCG00000006688	ANKRD35	NO	0.985308	1233.31	878.257	1731.23	2280.65	2222.76	2003.43	1466.9	2042.94	1732.44	1663.55	1801.32
ENSSSCG00000043923		NO	0.978585	1347.51	1053.33	1984.67	2205.32	2162.48	2068.43	1225.61	1664.5	1713.98	1680.07	1747.9
ENSSSCG00000013937	TSSK6	NO	0.985308	1144.3	1309.94	1625.77	1631.91	1952.25	1968.49	1122.27	1307.84	1507.85	1461.15	1554.54
ENSSSCG00000048990		NO	0.973224	965.141	600.9	1596.39	2177.91	1774.56	1804.19	772.561	1172.06	1357.97	1277.16	1438.77
ENSSSCG00000021950	TPPP2	NO	0.883429	904.599	497.932	1408.47	1972.22	1709.28	1585.08	1142.22	1528.47	1343.53	1291.14	1395.93
ENSSSCG00000024584	SPEM2	NO	0.962891	1032.57	1083.22	1440.95	1495.74	1623.21	1708.06	853.166	1110.62	1293.44	1237.48	1349.41
ENSSSCG00000005923	SPATC1	NO	0.960159	889.562	806.409	1286.69	1517.82	1523.87	1532.89	925.982	1268.45	1218.96	1156.53	1281.39
ENSSSCG00000006594	SMCP	NO	0.982928	863.185	525.423	1245.67	1797.29	1492.06	1363.14	815.173	1179.79	1160.22	1104.02	1216.41
ENSSSCG00000032122		NO	0.975245	812.97	745.773	1249.14	1421.09	1309.66	1279.07	789.215	1077.81	1085.59	1040.25	1130.94
ENSSSCG00000016278	TEX44	NO	0.847585	781.867	598.271	800.264	1171.73	1508.17	1493.06	810.171	1326.55	1061.26	975.117	1147.4
ENSSSCG00000028031	HDAC11	NO	0.822194	812.531	701.561	982.356	1566.54	1271.21	1179.93	691.82	1059.61	1033.19	939.478	1126.91
ENSSSCG00000047127	DNAJB8	NO	0.911833	722.527	581.824	975.827	1309.9	1300.55	1330.93	740.738	1099.42	1007.71	934.911	1080.52
ENSSSCG00000007169	TMEM239	NO	0.952666	876.29	879.382	1065.9	1087.93	1312.24	1346	587.531	858.172	1001.68	960.489	1042.87
ENSSSCG00000026387	REEP6	NO	0.739442	710.1	608.251	992.858	1511.02	1078.3	1215.48	646.312	1020.4	972.84	856.892	1088.79
ENSSSCG00000014803	LRRC51	NO	0.853347	628.409	494.485	910.661	1370.33	1406.21	1408.88	568.653	868.37	957	878.484	1035.52
ENSSSCG00000022295	C1H9orf16	NO	0.959493	686.406	918.136	967.099	1098.26	1215.2	1187.59	760.503	820.989	956.773	907.303	1006.24
ENSSSCG00000014690	UBQLNL	NO	0.71285	591.05	423.198	944.515	1512.77	1210.87	1301.03	497.645	892.94	921.753	811.021	1032.49
ENSSSCG00000006056	ODF1	NO	0.985308	663.047	406.384	1010.16	1468.59	1151.27	949.563	613.48	975.351	904.73	859.489	949.972
ENSSSCG00000016179	TNP1	NO	0.92548	1131.14	441.114	665.059	1220.99	940.123	1004.85	585.817	1115.25	888.042	830.534	945.551
ENSSSCG00000028202	RANGAP1	NO	0.683762	660.263	397.174	1043.64	1063.53	1178.54	980.299	750.912	816.256	861.327	908.34	814.315
ENSSSCG00000017296	ACE	NO	0.820877	625.467	458.892	748.061	1161.55	966.461	974.358	514.83	831.491	785.139	713.705	856.572
ENSSSCG00000009417	CBY2	NO	0.971734	570.013	504.872	660.201	825.495	868.177	855.646	660.925	1225.74	771.384	689.829	852.938
ENSSSCG00000007788	PHKG2	NO	0.918247	554.677	398.786	734.502	1054.63	1056.54	1021.01	510.429	797.26	765.979	714.037	817.921
ENSSSCG00000013536	ACSBG2	NO	0.831043	477.177	307.343	667.206	1100.67	1123.07	1119.3	498.156	819.129	764.006	691.403	836.609
ENSSSCG00000006471	ISG20L2	NO	0.910711	456.994	347.024	758.989	1121.5	913.464	911.601	544.933	774.098	728.575	668.595	788.555
ENSSSCG00000037471	LLCFC1	NO	0.964537	715.4	478.057	415.274	620.977	829.809	788.096	654.396	946.866	681.109	653.72	708.499
ENSSSCG00000006302	GPR161	NO	0.904353	483.942	385.856	676.603	982.269	837.602	810.71	511.839	749.649	679.809	627.497	732.121
ENSSSCG00000000685	TPI1	NO	0.875018	546.336	432.446	625.078	872.471	817.266	792.621	442.17	721.375	656.22	607.713	704.728
ENSSSCG00000036867	C11orf71	NO	0.949706	482.499	420.976	594.137	755.639	925.553	875.645	414.014	594.914	632.922	604.051	661.793
ENSSSCG00000010113	TSSK2	NO	0.685433	362.953	281.846	629.186	1036.75	806.276	859.661	357.058	622.134	619.483	538.868	700.099
ENSSSCG00000001858	CIB1	NO	0.972458	381.144	261.046	568.906	853.543	909.043	879.087	447.183	614.86	614.352	576.569	652.134
ENSSSCG00000003508	KIF17	NO	0.840899	429.533	312.816	577.583	871.723	751.815	764.686	405.214	649.572	595.368	541.036	649.699
ENSSSCG00000036887	CLPB	NO	0.794301	574.25	292.847	543.134	799.456	518.512	964.555	349.594	596.22	579.821	496.372	663.269
ENSSSCG00000026710	CARHSP1	NO	0.875018	370.619	294.479	878.333	716.167	667.95	665.679	325.203	507.728	553.27	560.526	546.013
ENSSSCG00000008094	CHCHD5	NO	0.831322	397.914	293.134	540.958	875.511	716.271	666.611	345.956	577.374	551.716	500.275	603.157
ENSSSCG00000032796	GRINA	NO	0.782717	359.623	330.245	461.211	704.99	768.843	779.101	359.992	558.569	540.322	487.417	593.226
ENSSSCG00000032811	ODF3L2	NO	0.949713	426.833	357.024	543.282	625.185	692.962	693.588	370.945	581.167	536.373	508.506	564.241
ENSSSCG00000011626		NO	0.649519	395.184	287.92	455.782	822.46	715.024	708.127	306.397	556.206	530.887	468.097	593.678
ENSSSCG00000015545	GLUL	NO	0.877877	400.293	282.7	514.768	751.525	574.922	632.064	443.097	574.479	521.731	483.27	560.192
ENSSSCG00000024307	PRM2	NO	0.916859	404.168	688.706	397.145	517.137	511.776	544.226	570.22	500.659	516.755	470.827	562.682
ENSSSCG00000002888	GAPDHS	NO	0.80268	381.338	258.524	471.126	790.52	648.938	620.766	355.128	607.443	516.723	464.132	569.313
ENSSSCG00000008552	PRR30	NO	0.728202	318.806	248.575	524.645	884.007	678.413	631.64	295.325	550.3	516.464	454.297	578.631
ENSSSCG00000017770	PROCA1	NO	0.6853	384.664	204.937	604.33	714.02	739.009	629.304	346.059	430.816	506.643	518.516	494.769
ENSSSCG00000037101	LRRC8B	NO	0.895412	321.827	255.947	480.672	674.967	685.899	705.756	357.086	519.289	500.18	461.371	538.99
ENSSSCG00000013445	CSNK1G2	NO	0.757651	335.91	292.344	469.074	701.144	587.779	616.777	375.283	560.734	492.381	442.011	542.75
ENSSSCG00000007232	DUSP15	NO	0.902863	384.309	355.4	472.239	605.114	610.683	620.659	356.528	510.879	489.476	455.94	523.013
ENSSSCG00000039024	SPSB3	NO	0.782717	333.965	273.14	477.809	727.487	597.866	634.103	305.426	487.713	479.689	428.766	530.611
ENSSSCG00000013905	FKBP8	NO	0.81289	335.752	245.079	467.412	755.029	658.924	586.924	278.398	475.878	475.425	435.122	515.727
ENSSSCG00000003619	AZIN2	NO	0.728202	333.492	232.223	449.076	756.471	617.208	597.191	277.303	522.88	473.23	419.27	527.191
ENSSSCG00000016579	CCDC136	NO	0.929832	339.985	208.66	417.339	859.268	603.274	567.5	300.755	452.203	468.623	415.338	521.908
ENSSSCG00000008624	LPIN1	NO	0.985659	345.64	226.168	448.79	605.001	645.858	610.807	348.719	488.906	464.986	447.251	482.721
ENSSSCG00000012842	RPLP2	NO	0.124351	545.796	276.496	316.316	313.871	676.613	398.2	614.9	534.034	459.528	538.406	380.65
ENSSSCG00000027197	DYRK1B	NO	0.925863	299.833	219.279	467.303	536.882	733.377	675.887	268.548	469.566	458.834	442.265	475.403
ENSSSCG00000018075	COX1	NO	0.793308	404.015	119.861	396.459	532.259	395.886	898.903	597.232	189.578	441.774	448.398	435.15
ENSSSCG00000017359	RUNDC3A	NO	0.809507	379.91	333.325	410.255	559.507	480.404	506.074	316.688	532.902	439.883	396.815	482.952
ENSSSCG00000030167	SLC25A39	NO	0.781215	340.487	261.633	378.766	624.926	631.057	566.044	248.962	444.794	437.084	399.818	474.349
ENSSSCG00000011673	LOC100739719	NO	0.109238	434.698	157.958	640.94	549.848	676.555	539.578	239.509	250.357	436.18	497.925	374.435
ENSSSCG00000035915	ABHD16B	NO	0.972458	343.416	613.952	388.062	323.452	449.667	458.224	503.539	337.81	427.265	421.171	433.36
ENSSSCG00000017814	C12H17orf97	NO	0.979003	334.736	259.815	396.197	499.828	586.198	563.505	303.234	431.427	421.868	405.091	438.644
ENSSSCG00000008434	TTC7A	NO	0.865766	258.814	196.002	446.957	631.401	488.13	575.351	284.841	466.995	418.561	369.685	467.437
ENSSSCG00000010015	OSBP2	NO	0.972605	280.335	165.401	487.182	659.555	459.791	541.833	327.557	424.182	418.23	388.716	447.743
ENSSSCG00000013064	EEF1G	NO	0.99841	293.106	194.908	427.488	621.372	516.906	457.071	320.592	463.261	411.838	389.523	434.153
ENSSSCG00000023820	ZMIZ2	NO	0.749166	275.218	257.761	411.773	622.416	512.065	560.456	241.358	408.103	411.144	360.103	462.184
ENSSSCG00000018051	COPS3	NO	0.782717	351.044	287.182	406.739	414.719	380.339	582.638	284.6	562.174	408.68	355.68	461.679
ENSSSCG00000012850	DEAF1	NO	0.862591	267.295	199.37	415.35	588.919	529.692	517.025	256.55	442.483	402.085	367.222	436.949
ENSSSCG00000024787	BPIFA3	NO	0.639672	235.486	143.256	348.437	592.415	542.982	635.402	238.171	476.831	401.623	341.269	461.976
ENSSSCG00000001391	CCHCR1	NO	0.811029	249.278	247.238	371.366	504.66	481.76	491.308	320.605	509.867	397.01	355.752	438.268
ENSSSCG00000022343	ENO1	NO	0.797504	239.199	194.883	354.937	525.6	519.376	540.73	284.017	514.593	396.667	349.382	443.952
ENSSSCG00000026414		NO	0.819895	236.09	184.501	363.435	549.157	528	510.119	281.918	484.08	392.162	352.361	431.964
ENSSSCG00000003366	CHD5	NO	0.985308	241.879	185.897	419.83	533.69	531.867	502.875	262.917	433.826	389.098	364.123	414.072
ENSSSCG00000005671	CRAT	NO	0.240584	216.959	200.252	365.114	751.539	499.624	557.525	161.583	280.13	379.091	310.82	447.362
ENSSSCG00000017829	SGSM2	NO	0.747088	217.68	162.64	423.41	681.794	456.374	448.517	211.24	376.364	372.252	327.176	417.328
ENSSSCG00000021750	MEX3D	NO	0.995411	267.805	413.669	341.687	328.464	435.989	453.614	386.151	342.285	371.208	357.908	384.508
ENSSSCG00000033310		NO	0.124917	337.524	110.963	346.619	507.753	463.464	284.36	422.375	474.671	368.466	392.496	344.436
ENSSSCG00000010134	TANGO2	NO	0.337863	212.577	194.189	359.834	740.27	435.914	464.274	148.234	392.106	368.425	289.14	447.71
ENSSSCG00000032115	OSGIN1	NO	0.805722	313.193	301.451	485.757	639.027	217.502	423.358	210.757	337.916	366.12	306.802	425.438
ENSSSCG00000001908	CCDC33	NO	0.533925	218.531	149.917	339.084	629.733	482.369	515.272	199.806	376.704	363.927	309.947	417.906
ENSSSCG00000008558	AGBL5	NO	0.789938	292.723	216.014	367.532	525.888	425.46	461.256	236.982	376.752	362.826	330.674	394.978
ENSSSCG00000000018	KIAA0930	NO	0.834228	225.379	191.344	379.731	511.302	451.609	513.167	258.51	371.19	362.779	328.807	396.751
ENSSSCG00000040507	PDLIM7	NO	0.853347	308.633	269.439	290.065	402.959	466.804	508.878	262.024	387.957	362.095	331.881	392.308
ENSSSCG00000010104	LOC100153925	NO	0.89587	301.978	429.362	299.617	157.816	488.865	505.982	388.035	255.324	353.372	369.624	337.121
ENSSSCG00000011131	PRKCQ	NO	0.948553	205.93	125.081	339.398	495.502	465.832	445.725	220.917	356.286	331.834	308.019	355.648
ENSSSCG00000007281	MAP1LC3A	NO	0.874622	229.987	248.135	309.71	458.746	404.742	405.695	253.111	305.825	326.994	299.387	354.6
ENSSSCG00000036595	TNFRSF6B; ZGPAT	NO	0.98345	265.864	234.144	317.863	380.756	392.274	361.427	304.236	357.426	326.749	320.059	333.438
ENSSSCG00000013043	MACROD1	NO	0.972458	290.326	264.378	328.03	371.206	373.177	346.449	291.9	343.018	326.06	320.858	331.263
ENSSSCG00000031733	AKAP12	NO	0.699667	232.802	118.731	368.738	439.589	461.285	402.588	249.253	321.045	324.254	328.019	320.488
ENSSSCG00000008834	SPATA18	NO	0.995409	222.721	195.007	310.583	390.993	407.015	425.512	302.195	333.417	323.43	310.629	336.232
ENSSSCG00000002494	CLMN	NO	0.811029	213.097	149.247	286.702	431.936	420.598	428.053	232.754	405.031	320.927	288.288	353.567
ENSSSCG00000017943	ACAP1	NO	0.874246	225.42	100.018	321.058	537.057	419.866	414.157	154.902	377.856	318.792	280.312	357.272
ENSSSCG00000006729	TENT5C	NO	0.835339	231.348	183.548	324.746	477.394	380.723	418.749	200.758	301.298	314.82	284.394	345.247
ENSSSCG00000013613	ELOF1	NO	0.64784	201.698	146.171	283.577	531.917	418.41	445.656	182.152	304.435	314.252	271.459	357.045
ENSSSCG00000003150	NUCB1	NO	0.996714	199.019	82.1822	340.309	484.498	450.064	316.452	238.77	399.127	313.803	307.04	320.565
ENSSSCG00000034994	AKAP1	NO	0.904963	237.45	198.054	259.443	393.917	415.096	412.265	238.522	314.179	308.616	287.628	329.604
ENSSSCG00000001535	TCP11	NO	0.876104	150.946	111.932	342.643	507.338	449	464.791	172.669	258.294	307.202	278.815	335.589
ENSSSCG00000022901	KLHDC3	NO	0.541368	196.971	138.696	233.739	442.598	431.969	445.594	177.775	334.038	300.173	260.114	340.232
ENSSSCG00000001736	CRISP2	NO	0.591746	267.108	91.5036	302.626	373.158	460.632	434.682	199.467	271.343	300.065	307.458	292.672
ENSSSCG00000013633	CARM1	NO	0.662336	172.713	143.409	295.428	485.694	409.48	421.331	162.979	304.903	299.492	260.15	338.834
ENSSSCG00000029097	RCC1	NO	0.761515	198.246	126.454	267.322	444.037	398.786	400.754	176.047	358.196	296.23	260.1	332.36
ENSSSCG00000018055	PEMT	NO	0.830999	211.129	187.918	247.987	350.66	427.04	431.397	192.772	286.414	291.915	269.732	314.097
ENSSSCG00000009383	CCDC70	NO	0.83313	277.671	175.51	210.094	399.682	339.578	301.114	233.3	385.304	290.282	265.161	315.403
ENSSSCG00000001410	BAG6	NO	0.60934	157.129	111.911	267.803	469.498	380.261	401.895	181.149	335.266	288.114	246.586	329.643
ENSSSCG00000033691	RAB26	NO	0.859474	207.541	140.625	275.32	410.71	338.817	337.926	189.076	325.529	278.193	252.689	303.698
ENSSSCG00000026257	STMN1	NO	0.737721	187.592	88.1011	332.93	409.765	367.512	326.919	204.528	285.48	275.353	273.14	277.566
ENSSSCG00000028425		NO	0.64784	173.084	149.134	214.983	410.891	319.506	316.32	208.21	375.868	270.999	228.946	313.053
ENSSSCG00000037391	ZNF775	NO	0.806075	233.925	232.671	312.385	161.076	359.888	383.478	239.983	235.449	269.857	286.545	253.169
ENSSSCG00000030206	STK33	NO	0.871339	201.855	129.055	278.776	436.604	331.379	313.49	168.129	295.621	269.364	245.035	293.693
ENSSSCG00000039316	GSG1	NO	0.518737	167.385	103.502	174.216	381.849	293.064	287.573	243.899	490.071	267.695	219.641	315.749
ENSSSCG00000016211	ATG9A	NO	0.43639	239.414	135.983	254.445	560.492	272.701	365.521	112.321	177.755	264.829	219.72	309.938
ENSSSCG00000003046	RABAC1	NO	0.84062	215.821	177.889	223.482	344.098	355.083	335.808	174.903	273.851	262.617	242.322	282.911
ENSSSCG00000013440	ATP8B3	NO	0.62256	178.864	116.09	244.152	432.898	368.354	403.398	123.667	232.764	262.523	228.759	296.287
ENSSSCG00000022250	SPACA9	NO	0.695123	171.83	130.222	256.138	419.893	348.873	360.376	137.25	247.421	259	228.523	289.478
ENSSSCG00000007681	CUX1	NO	0.6755	167.118	119.358	235.322	409.766	358.249	358.392	151.054	265.73	258.124	227.936	288.312
ENSSSCG00000012481	TSPAN6	NO	0.55433	268.083	142.908	368.098	278.156	372.53	304.184	147.741	177.846	257.443	289.113	225.774
ENSSSCG00000003845	MROH7	NO	0.724292	169.843	123.793	251.65	441.888	377.527	339.699	115.976	217.795	254.771	228.749	280.794
ENSSSCG00000005901	GPT	NO	0.86795	200.332	185.589	243.949	313.754	300.827	291.929	183.663	300.35	252.549	232.193	272.905
ENSSSCG00000036915	C17orf107	NO	0.814178	189.983	158.2	225.178	360.133	321.732	329.159	174.328	257.067	251.972	227.805	276.14
ENSSSCG00000003204	VRK3	NO	0.742825	148.072	86.4526	259.278	408.81	340.664	348.479	156.398	263.039	251.399	226.103	276.695
ENSSSCG00000008061	ELOB	NO	0.9651	235.762	197.575	211.964	286.323	312.673	292.603	191.246	239.303	245.931	237.911	253.951
ENSSSCG00000047940		NO	0.94507	131.719	257.282	175.349	187.358	268.753	255.785	342.116	335.145	244.189	229.485	258.892
ENSSSCG00000021617	FNDC8	NO	0.738098	175.213	120.38	189.466	321.738	324.493	338.152	174.683	298.125	242.781	215.963	269.599
ENSSSCG00000047045	C11orf94	NO	0.680775	154.722	123.2	192.363	315.252	341.151	354.189	146.402	290.898	239.772	208.66	270.885
ENSSSCG00000013916	COMP	NO	0.890526	128.563	91.3424	274.053	418.51	288.727	267.2	164.517	268.899	237.726	213.965	261.488
ENSSSCG00000040428	C20orf141	NO	0.626176	207.838	149.614	230.188	397.371	250.688	268.993	127.61	255.391	235.962	204.081	267.842
ENSSSCG00000021706	KIF21B	NO	0.886082	213.138	164.241	195.011	277.634	365.771	369.024	115.971	186.186	235.872	222.473	249.271
ENSSSCG00000007453	EYA2	NO	0.725583	149.593	96.1561	230.165	383.434	327.848	324.592	128.191	243.533	235.439	208.949	261.929
ENSSSCG00000024052	GPX4	NO	0.68383	186.441	126.135	171.523	321.59	282.208	271.538	181.945	329.013	233.799	205.529	262.069
ENSSSCG00000004408	SMPD2	NO	0.790467	190.086	167.215	200.043	336.868	294.332	285.199	160.087	234.675	233.563	211.137	255.989
ENSSSCG00000013510	UBXN6	NO	0.865335	171.794	132.299	240.02	348.397	264.324	280.382	167.171	247.234	231.452	210.827	252.078
ENSSSCG00000014567	TRIM66	NO	0.856572	163.519	141.513	238.432	343.48	333.26	325.562	113.687	173.892	229.168	212.224	246.112
ENSSSCG00000029745	FAM193A	NO	0.83424	143.4	119.622	222.284	325.979	314.454	325.727	144.18	217.685	226.666	206.079	247.253
ENSSSCG00000014634	C11orf42	NO	0.713968	183.755	140.907	193.234	279.38	252.107	273.959	155.752	321.418	225.064	196.212	253.916
ENSSSCG00000010253	HK1	NO	0.90142	107.807	103.432	208.389	321.64	316.226	310.051	149.182	256.634	221.67	195.401	247.939
ENSSSCG00000027991	SCNN1D	NO	0.565732	141.469	143.275	212.958	308.955	302.937	285.269	92.6099	258.203	218.21	187.494	248.926
ENSSSCG00000018033	UBB	NO	0.00508516	296.208	114.781	178.643	146.922	232.885	118.4	460.602	156.91	213.169	292.085	134.253
ENSSSCG00000002955	CATSPERG	NO	0.525526	152.272	108.417	187.984	343.512	296.649	317.017	102.452	189.379	212.21	184.84	239.581
ENSSSCG00000040412		NO	0.985659	164.647	175.165	243.786	276.571	208.123	203.483	209.35	211.337	211.558	206.477	216.639
ENSSSCG00000006954	EEF1D	NO	0.99841	127.727	126.273	189.892	229.64	238.042	233.731	248.787	281.265	209.42	201.112	217.727
ENSSSCG00000028892	SH3D21	NO	0.671946	177.797	116.061	223.384	408.447	229.922	224.153	85.6348	168.637	204.254	179.184	229.325
ENSSSCG00000005627	AK1	NO	0.839771	135.962	80.2725	188.234	305.955	309.885	306.817	100.767	204.454	204.043	183.712	224.375
ENSSSCG00000010603	NEURL1	NO	0.776871	124.084	137.971	219.673	302.127	214.125	263.988	152.596	214.277	203.605	177.62	229.591
ENSSSCG00000035728	ANAPC11	NO	0.983206	208.866	118.36	216.56	322.882	223.197	236.061	122.476	178.86	203.408	192.775	214.041
ENSSSCG00000001573	PIM1	NO	0.852826	149.411	161.221	174.239	268.44	215.468	207.397	193.758	244.072	201.751	183.219	220.282
ENSSSCG00000003018	LIPE	NO	0.425534	95.3277	76.0249	191.151	361.413	230.547	258.534	136.855	249.504	199.92	163.47	236.369
ENSSSCG00000023272	ILK	NO	0.425534	127.718	90.3375	191.259	380.047	231.802	242.108	103.255	211.407	197.242	163.508	230.975
ENSSSCG00000006821	GSTM3	NO	0.709029	93.4283	33.0854	184.741	313.739	187.089	160.234	248.619	323.031	192.996	178.469	207.522
ENSSSCG00000008678	SLBP; TMEM129	NO	0.103112	206.181	145.971	112.156	282.54	153.313	178.195	136.786	295.66	188.85	152.109	225.591
ENSSSCG00000014335	REEP2	NO	0.687713	178.095	111.81	222.61	316.252	212.953	233.995	77.5845	129.623	185.365	172.811	197.92
ENSSSCG00000008686	C8H4orf48	NO	0.92278	174.625	208.165	155.719	128.367	232.268	197.377	193.596	181.328	183.931	189.052	178.809
ENSSSCG00000013600	RAB11B	NO	0.484042	95.5747	108.863	137.799	321.211	278.147	186.047	92.261	237.344	182.156	150.946	213.366
ENSSSCG00000040663	HERPUD1	NO	0.852333	112.665	90.5189	165.123	252.617	226.82	234.502	154.707	219.163	182.014	164.829	199.2
ENSSSCG00000002675	DNAAF1	NO	0.99434	127.381	94.2789	197.076	245.6	222.856	203.987	143.796	214.586	181.195	172.777	189.613
ENSSSCG00000003191	TSKS	NO	0.778246	118.227	86.3789	164.863	274.629	230.966	226.481	128.684	218.976	181.151	160.685	201.616
ENSSSCG00000014056	RNF44	NO	0.774519	122.915	99.2624	168.963	250.001	263.367	265.122	94.0445	165.81	178.686	162.322	195.049
ENSSSCG00000009566	C13orf46	NO	0.985308	167.368	87.9948	165.055	262.757	194.482	175.623	126.283	225.797	175.67	163.297	188.043
ENSSSCG00000038726	RANGRF	NO	0.597034	157.855	102.958	171.52	336.483	191.653	194.963	78.5067	157.055	173.874	149.884	197.865
ENSSSCG00000005651	ODF2	NO	0.943055	129.199	69.6758	166.845	253.259	235.187	211.841	132.93	178.306	172.155	166.04	178.27
ENSSSCG00000018078	COX2	NO	0.754893	110.913	19.4	245.485	206.69	1.4e-05	310.176	398.423	83.4706	171.826	188.705	154.934
ENSSSCG00000038280	NSUN4	NO	0.461847	108.095	78.5722	147.219	293.119	245.399	241.725	81.3623	175.859	171.419	145.519	197.319
ENSSSCG00000035852	CSNK1D	NO	0.774073	109.801	82.761	169.272	278.577	201.819	223.13	101.509	196.182	170.381	145.6	195.162
ENSSSCG00000003153	FTL	NO	0.960159	139.014	64.7578	114.768	208.355	264.202	209.713	137.11	224.805	170.341	163.774	176.908
ENSSSCG00000013032	GPR137	NO	0.913049	141.934	83.9083	145.762	169.759	256.932	258.083	121.979	176.572	169.366	166.652	172.081
ENSSSCG00000003419	MAD2L2	NO	0.687713	141.337	93.2963	168.861	291.919	188.909	199.026	92.9715	175.668	168.998	148.02	189.977
ENSSSCG00000014568	DENND2B	NO	0.67444	116.591	97.3882	134.837	267.637	213.77	206.687	118.794	195.573	168.91	145.998	191.821
ENSSSCG00000021866	RNASE6; EDDM3B	NO	0.999173	97.2182	59.7954	244.88	315.332	217.321	205.81	72.5242	121.96	166.855	157.986	175.724
ENSSSCG00000022609	WWP2	NO	0.627162	93.1678	66.4029	167.814	310.177	249.587	214.685	70.4352	153.509	165.722	145.251	186.193
ENSSSCG00000013017	EHD1	NO	0.736945	92.6553	90.8459	159.37	263.634	199.315	228.287	105.014	170.453	163.697	139.088	188.305
ENSSSCG00000013642	PDE4A	NO	0.533773	106.05	69.468	149.208	283.611	213.411	230.192	87.6057	162.352	162.737	139.069	186.406
ENSSSCG00000008694	GRK4	NO	0.749765	108.219	85.6061	145.99	230.353	224.717	216.787	103.554	183.623	162.356	145.62	179.092
ENSSSCG00000002286	FAM71D	NO	0.973008	74.7207	40.0886	174.48	268.953	210.576	244.31	116.801	160.501	161.304	144.144	178.463
ENSSSCG00000013238	SLC39A13	NO	0.520043	131.01	117.16	123.7	257.035	194.664	170.563	112.5	175.039	160.209	140.469	179.949
ENSSSCG00000033082	HGS	NO	0.988629	108.294	106.302	166.631	212.365	210.499	178.543	132.486	162.262	159.673	154.477	164.868
ENSSSCG00000033395		NO	0.858337	160.68	82.4875	132.98	226.081	163.112	194.992	112.081	179.332	156.468	142.213	170.723
ENSSSCG00000016441	ABCF2	NO	0.815455	91.3997	48.335	164.093	258.97	164.66	207.571	114.582	196.724	155.792	133.684	177.9
ENSSSCG00000029034	COX4I1	NO	0.0595947	254.298	53.4272	69.3709	109.369	144.722	106.873	289.15	215.56	155.346	189.385	121.307
ENSSSCG00000003359	TPRG1L	NO	0.643576	115.451	87.9356	130.798	243.595	182.529	197.273	106.568	176.797	155.118	133.836	176.4
ENSSSCG00000003357	ACTRT2	NO	0.728202	130.245	92.687	126.03	205.92	182.812	187.291	107.216	201.843	154.256	136.576	171.935
ENSSSCG00000017904	ENO3	NO	0.627946	85.165	78.2646	93.8931	226.395	189.992	169.933	125.113	261.363	153.765	123.541	183.989
ENSSSCG00000010084	LOC100155534; SDF2L1	NO	0.9237	108.741	87.8549	135.651	206.812	197.999	215.175	125.002	148.984	153.277	141.848	164.706
ENSSSCG00000004008	WDR27	NO	0.335242	137.967	96.4025	114.206	282.371	151.792	161.724	84.3497	187.756	152.071	122.078	182.063
ENSSSCG00000033689	GPS1	NO	0.541692	124.255	89.2884	212.196	294.38	130.604	159.656	61.2737	134.431	150.76	132.082	169.439
ENSSSCG00000030255	EIF4G1	NO	0.936956	89.721	52.1173	128.578	208.783	217.845	208.347	112.166	175.996	149.194	137.077	161.311
ENSSSCG00000016207	RETREG2	NO	0.616292	113.868	85.5058	108.173	239.141	201.109	172.354	86.7675	180.863	148.473	127.48	169.466
ENSSSCG00000030211	NBR1	NO	0.856572	90.3812	50.2821	140.912	248.16	190.559	193.164	103.132	167.66	148.031	131.246	164.816
ENSSSCG00000005911	OPLAH	NO	0.658149	102.927	85.7954	134.06	219.375	195.496	190.783	84.3344	167.594	147.545	129.204	165.887
ENSSSCG00000032031	QARS1	NO	0.774539	98.2623	68.0489	168.222	271.766	161.011	167.584	83.5329	161.198	147.453	127.757	167.149
ENSSSCG00000007942	HMOX2	NO	0.77013	118.485	49.9737	84.7673	265.735	163.324	215.12	109.611	148.674	144.461	119.047	169.876
ENSSSCG00000017565	SPATA20	NO	0.256864	84.5052	60.4619	115.238	270.723	194.901	194.931	73.1946	160.838	144.349	116.96	171.739
ENSSSCG00000006487	CCT3	NO	0.627642	130.838	82.9857	104.43	195.002	151.047	180.113	112.465	196.31	144.149	124.695	163.603
ENSSSCG00000011349	NPG1; NPG3; NPG4; PG-2; LOC110256441	NO	0.92548	73.5724	121.161	181.139	155.444	187.027	164.26	104.755	164.055	143.927	136.623	151.23
ENSSSCG00000002913	PRODH2	NO	0.82483	94.7229	80.7969	132.793	189.712	204.301	199.994	93.0038	154.443	143.721	131.205	156.236
ENSSSCG00000012903	PITPNM1	NO	0.778583	96.7171	76.3723	147.79	227.89	184.562	179.676	83.0195	148.017	143.006	128.022	157.989
ENSSSCG00000005924	MROH1	NO	0.667383	88.9796	78.6855	132.806	220.014	206.844	196.115	66.2193	143.052	141.589	123.712	159.467
ENSSSCG00000032556	ALDOA	NO	0.586031	84.0686	64.0683	105.249	200.552	186.701	180.965	104.997	201.248	140.981	120.254	161.708
ENSSSCG00000008318	VAX2	NO	0.820722	98.2071	111.266	158.206	208.946	153.05	152.037	95.6731	149.454	140.855	126.284	155.426
ENSSSCG00000015291	LEMD1	NO	0.673803	106.308	71.409	103.539	241.078	178.18	164.256	95.8357	154.263	139.358	120.966	157.751
ENSSSCG00000040118	PPDPF	NO	0.9061	83.6036	90.1487	127.953	154.404	177.507	204.725	120.516	147.261	138.265	127.395	149.135
ENSSSCG00000040466		NO	0.725583	102.189	71.7563	122.269	208.007	178.988	179.319	82.3691	150.888	136.973	121.454	152.493
ENSSSCG00000003972	SLFNL1	NO	0.856572	124.777	153.475	124.137	162.274	121.687	142.94	123.539	141.128	136.745	123.535	149.954
ENSSSCG00000039670	EPN1	NO	0.892965	102.351	103.111	123.505	167.985	161.056	157.873	115.591	156.05	135.94	125.625	146.255
ENSSSCG00000029630	TAF10	NO	0.942786	97.1597	53.4971	102.813	191.704	229.3	209.534	76.6831	118.375	134.883	126.489	143.278
ENSSSCG00000013906	KXD1	NO	0.955493	85.6874	55.2887	137.384	203.167	183.175	171.869	93.5527	140.163	133.786	124.95	142.622
ENSSSCG00000027300	TNP2	NO	0.95561	147.775	74.3017	108.122	177.671	162.858	171.883	86.1869	136.313	133.139	126.236	140.042
ENSSSCG00000007243	PLAGL2	NO	0.641812	98.2525	72.4869	128.779	235.062	147.573	142.104	81.2414	154.338	132.48	113.961	150.998
ENSSSCG00000013764	RFX1	NO	0.820484	78.1724	70.1146	130.327	194.219	157.685	180.962	103.888	139.351	131.84	117.518	146.162
ENSSSCG00000034387	ARL2	NO	0.380782	90.4704	67.8132	120.927	227.881	171.869	188.528	52.1685	128.53	131.024	108.859	153.188
ENSSSCG00000007031	POLB	NO	0.925004	91.3192	55.9048	158.554	196.392	167.67	152.419	89.0469	128.506	129.977	126.648	133.305
ENSSSCG00000014818	STARD10	NO	0.956738	94.8125	76.7314	121.461	168.671	182.874	186.478	87.3374	111.086	128.681	121.621	135.742
ENSSSCG00000016721	DBNL	NO	0.957771	98.6793	67.083	132.056	214.127	141.316	121.118	101.487	148.878	128.093	118.385	137.802
ENSSSCG00000016435	SMARCD3	NO	0.919909	70.767	48.7315	127.162	243.293	173.321	166.521	77.6669	115.198	127.833	112.229	143.436
ENSSSCG00000038304	RBM4B	NO	0.534719	87.2413	65.7946	115.565	217.584	162.5	173.799	67.3146	121.33	126.391	108.155	144.627
ENSSSCG00000040524	ISYNA1	NO	0.634318	86.1631	58.9544	80.7754	188.945	174.635	193.432	76.9706	138.286	124.77	104.636	144.904
ENSSSCG00000008899	ARL9	NO	0.0321002	116.171	47.6128	183.068	114.378	201.995	115.728	110.053	102.825	123.979	152.822	95.1361
ENSSSCG00000000739	FOXM1	NO	0.651072	77.2945	46.4046	105.131	191.76	193.019	195.256	56.5629	125.222	123.831	108.002	139.661
ENSSSCG00000017745	UTP6	NO	0.322357	77.4226	54.8934	72.1447	207.699	142.777	138.116	86.1336	208.616	123.475	94.6195	152.331
ENSSSCG00000004968	PAQR5	NO	0.627909	73.602	47.4418	85.9867	171.358	207.627	205.787	64.3184	130.639	123.345	107.884	138.806
ENSSSCG00000003913	MAST2	NO	0.749029	85.8552	60.723	105.456	158.894	173.842	183.653	69.4067	146.007	122.98	108.64	137.319
ENSSSCG00000017793	ANKRD13B	NO	0.643906	101.759	70.8413	104.651	189.011	150.94	150.361	72.7844	138.009	122.295	107.533	137.056
ENSSSCG00000005594	WDR38	NO	0.555665	72.2034	46.5997	97.7684	210.888	176.837	177.383	66.0932	128.681	122.057	103.226	140.888
ENSSSCG00000012269	CDK16	NO	0.427845	85.7141	63.1613	105.558	189.646	131.531	162.444	71.8917	156.208	120.769	98.6737	142.865
ENSSSCG00000009555	LAMP1	NO	0.854537	79.5588	51.2399	134.929	203.099	140.875	150.62	75.9448	127.678	120.493	107.827	133.159
ENSSSCG00000016392	LOC100515176	NO	0.983993	71.9651	38.8927	120.832	196.098	158.164	141.266	79.8748	132.673	117.471	107.709	127.233
ENSSSCG00000010393	C14H10orf53	NO	0.799202	61.8571	38.3564	106.067	165.541	178.883	181.281	73.4685	130.488	116.993	105.069	128.917
ENSSSCG00000032552	RAD51D; RFFL	NO	0.787296	69.3048	49.7017	83.7812	272.368	134.116	133.854	69.4304	116.114	116.084	89.1581	143.009
ENSSSCG00000025344	PHC2	NO	0.769581	78.8397	50.1175	112.039	194.186	146.489	143.447	69.724	127.392	115.279	101.773	128.786
ENSSSCG00000033546	UBXN11	NO	0.849962	76.7889	45.2169	100.023	190.961	150.247	149.228	69.6683	137.73	114.983	99.1818	130.784
ENSSSCG00000000359	BLOC1S1	NO	0.781215	60.1504	45.8509	82.0735	177.925	157.531	144.518	102.019	144.135	114.275	100.444	128.107
ENSSSCG00000034014	MRPL40	NO	0.80268	75.5531	64.2424	80.9629	149.962	155.188	155.163	93.8296	127.952	112.857	101.383	124.33
ENSSSCG00000016557	CPA1	NO	0.702845	60.2469	37.34	104.224	204.646	160.097	152.487	62.4317	117.636	112.389	96.75	128.027
ENSSSCG00000009619	SFTPC	NO	0.819773	109.106	68.4575	105.42	189.545	87.5667	83.943	89.0533	159.648	111.592	97.7863	125.399
ENSSSCG00000011107	CCNY	NO	0.819895	57.4029	73.8873	81.2305	93.2938	198.526	185.561	68.4154	126.407	110.59	101.394	119.787
ENSSSCG00000005301	FAM214B	NO	0.400157	84.2389	59.8494	89.9051	179.777	132.502	134.986	60.5473	140.865	110.334	91.7983	128.869
ENSSSCG00000011020	JCAD	NO	0.564208	35.3416	55.9298	107.719	174.483	154.081	152.419	69.7568	128.811	109.818	91.7244	127.911
ENSSSCG00000005941	KHDRBS3	NO	0.192294	70.1309	47.9814	73.6824	159.373	132.485	169.808	72.396	149.127	109.373	87.1735	131.572
ENSSSCG00000025206	RNF19B	NO	0.949713	49.9359	44.9964	89.0218	147.034	195.679	184.119	67.2767	89.4851	108.444	100.478	116.409
ENSSSCG00000036772	CAMTA1	NO	0.878477	79.5691	38.5477	71.1647	138.203	133.261	148.175	88.2656	149.871	105.882	93.0651	118.699
ENSSSCG00000016202	RNF25	NO	0.579615	69.2201	50.1466	97.3384	179.979	124.608	130.823	67.5091	126.856	105.81	89.6689	121.951
ENSSSCG00000039238	CABS1	NO	0.793308	93.7415	33.1127	111.944	160.25	138.933	117.132	69.9844	120.468	105.696	103.651	107.741
ENSSSCG00000000194	LOC100127131	NO	0.926877	84.437	40.1953	86.4267	170.528	168.599	118.58	66.3142	106.91	105.249	101.444	109.053
ENSSSCG00000008987	CCNI	NO	0.703705	81.2639	58.9741	188.813	95.8099	125.903	110.145	88.0789	92.9065	105.237	121.015	89.459
ENSSSCG00000022788	PPA2	NO	0.814178	97.923	48.3794	75.2851	140.316	130.121	152.359	75.166	121.52	105.134	94.6237	115.644
ENSSSCG00000034174	AURKC	NO	0.749166	57.0071	54.646	113.072	161.986	111.297	136.79	81.7404	121.886	104.803	90.7792	118.827
ENSSSCG00000013601	MARCHF2	NO	0.591746	62.0614	58.4684	80.7728	181.494	134.533	125.858	74.5024	116.079	104.221	87.9673	120.475
ENSSSCG00000003570	WDTC1	NO	0.531703	54.0473	48.1621	91.7341	168.521	129.375	131.301	73.4101	134.15	103.838	87.1417	120.534
ENSSSCG00000033629	KLHL10	NO	0.977034	73.6034	37.2709	87.9275	148.33	153.461	124.356	74.8353	124.557	103.043	97.4569	108.628
ENSSSCG00000050990		NO	0.978043	52.7336	33.4451	119.188	186.476	168.088	143.022	41.8147	70.6279	101.924	95.456	108.393
ENSSSCG00000015120	USP2	NO	0.322615	49.5882	39.7295	65.7265	137.898	177.135	172.479	58.142	112.899	101.7	87.6479	115.751
ENSSSCG00000050678	C12orf54	NO	0.965654	100.014	35.5286	88.9937	150.28	126.938	154.494	61.5973	90.0458	100.986	94.3858	107.587
ENSSSCG00000038508	SPTBN2	NO	0.777341	76.7519	61.9771	76.1208	132.142	136.681	135.492	75.3225	112.7	100.899	91.2191	110.578
ENSSSCG00000000383	RNF41	NO	0.676677	63.6769	41.8511	93.9679	169.813	135.979	144.447	55.6549	98.0222	100.427	87.3197	113.533
ENSSSCG00000036501	WDR1	NO	0.29264	71.0369	51.4674	91.1579	159.605	93.3866	139.175	66.7168	130.207	100.344	80.5746	120.114
ENSSSCG00000000040	SEPTIN3	NO	0.8005	54.472	41.5915	110.212	158.03	124.947	133.666	60.7177	106.55	98.7733	87.5872	109.959
ENSSSCG00000033340	ZNF543	NO	0.98345	63.5179	55.0285	120.444	127.824	105.288	111.424	92.5817	109.515	98.2028	95.4579	100.948
ENSSSCG00000001907	UBL7	NO	0.470197	78.2337	56.4098	72.2882	127.195	115.607	133.58	59.5392	140.409	97.9077	81.4169	114.399
ENSSSCG00000014913	PICALM	NO	0.950989	74.3286	56.2633	88.6574	104.534	136.172	113.55	90.1927	115.42	97.3898	97.3378	97.4418
ENSSSCG00000011553	TTLL3	NO	0.400928	62.3394	53.7101	85.4833	165.216	134.97	127.051	46.7944	101.258	97.1028	82.3967	111.809
ENSSSCG00000009276	XPO4	NO	0.0692103	83.7362	46.716	50.4378	134.293	107.432	105.669	64.8359	183.525	97.0805	76.6104	117.551
ENSSSCG00000002977	SPMI	NO	0.168886	124.728	18.9039	29.549	11.7478	154.677	28.8218	406.767	1.22986	97.053	178.93	15.1758
ENSSSCG00000028355	ACTG1	NO	0.269808	88.0181	32.8193	104.649	123.741	143.859	101.41	85.5163	87.9666	95.9974	105.511	86.4842
ENSSSCG00000015862	LIMS2	NO	0.834228	67.3476	44.6617	89.8249	167.984	103.995	103.009	73.4344	116.825	95.8853	83.6505	108.12
ENSSSCG00000040594	C3orf20	NO	0.490558	44.8089	33.1592	76.6166	152.604	144.151	149.668	57.3028	106.465	95.597	80.7199	110.474
ENSSSCG00000034265	DESI1	NO	0.434536	63.247	30.4673	79.558	211.125	113.246	108.735	50.403	107.274	95.5069	76.6136	114.4
ENSSSCG00000016269	SPATA3	NO	0.569639	75.7848	65.712	74.4265	128.037	111.614	138.112	65.6589	104.496	95.4801	81.8711	109.089
ENSSSCG00000022164	HSF2BP	NO	0.573536	91.9469	47.262	63.5378	146.609	93.6841	100.818	69.4389	148.345	95.2051	79.652	110.758
ENSSSCG00000018045	ULK2	NO	0.937258	58.6499	60.8058	92.5287	163.816	121.7	110.254	66.4713	87.0341	95.1574	84.8374	105.477
ENSSSCG00000027135	PPM1G	NO	0.000405086	57.1733	31.4737	104.024	107.057	210.868	61.1877	130.257	59.1448	95.1481	125.581	64.7157
ENSSSCG00000030368	HSPA1L	NO	0.720286	28.1688	17.3421	89.3039	189.128	141.662	134.747	58.4678	99.1241	94.743	79.4007	110.085
ENSSSCG00000007511	ANKRD60	NO	0.521742	66.2593	41.0698	31.6769	71.6635	164.363	173.816	69.7107	137.196	94.4694	83.0024	105.936
ENSSSCG00000013630	DNM2	NO	0.556766	66.9783	54.2551	82.4829	151.188	117.244	131.33	56.5381	92.4502	94.0584	80.8109	107.306
ENSSSCG00000025966	EIF4H	NO	0.836045	79.9206	45.432	118.315	123.055	108.273	99.7261	73.3042	101.462	93.6859	94.9531	92.4188
ENSSSCG00000025612	SPATA19	NO	0.533773	39.7326	20.4685	84.5037	206.424	94.3915	111.961	64.9137	127.01	93.6756	70.8854	116.466
ENSSSCG00000016428	CCT8L2	NO	0.581141	68.3118	70.4802	61.8843	117.525	93.2788	91.9917	91.2798	154.464	93.6519	78.6887	108.615
ENSSSCG00000003711	CABYR	NO	0.890526	76.4706	24.4569	111.312	161.981	150.602	135.772	30.989	57.6162	93.6499	92.3433	94.9566
ENSSSCG00000045734		NO	0.542802	64.9323	46.1807	78.8223	152.794	118.609	113.736	52.4089	117.953	93.1795	78.693	107.666
ENSSSCG00000030049	HNRNPUL1	NO	0.737721	65.181	38.9116	82.4904	142.599	111.188	128.41	68.2827	104.101	92.6455	81.7856	103.505
ENSSSCG00000035904	LOC100525692; RPL7A	NO	0.000268013	70.2698	13.6658	80.9265	70.0497	165.388	95.4193	169.353	73.7336	92.3507	121.484	63.2171
ENSSSCG00000035653	PGAP2	NO	0.955261	91.155	83.0584	88.9502	137.062	71.6863	93.1003	51.2829	121.153	92.181	75.7686	108.594
ENSSSCG00000040157	AP3D1	NO	0.754893	59.9388	25.7251	112.59	133.808	129.377	116.152	71.9076	87.8765	92.1718	93.4532	90.8904
ENSSSCG00000036280	ZNF74; DGCR2	NO	0.916859	59.7707	61.1324	114.852	131.045	128.357	105.186	47.921	87.5663	91.9788	87.7252	96.2325
ENSSSCG00000008682	NSD2	NO	0.921569	70.0059	50.24	68.8631	105.002	91.9118	100.297	67.2516	179.702	91.6591	74.5081	108.81
ENSSSCG00000011162	LARP4B	NO	0.795647	85.0242	52.8665	59.3264	113.777	95.4959	83.6366	84.3251	152.236	90.836	81.0429	100.629
ENSSSCG00000013435	MBD3	NO	0.706188	61.1469	39.0947	90.1952	154.819	120.126	127.691	48.0957	84.5103	90.7097	79.8909	101.529
ENSSSCG00000040727	ASPSCR1	NO	0.87249	59.6158	48.1344	81.6055	131.488	128.727	121.594	61.9217	89.0341	90.2651	82.9676	97.5626
ENSSSCG00000002989	AKT2	NO	0.658819	48.0573	30.9224	99.1578	182.426	113.536	116.73	45.7864	84.9405	90.1946	76.6343	103.755
ENSSSCG00000036909	ERI3	NO	0.140868	91.5	66.1111	47.4573	143.153	67.695	195.235	27.0875	80.7433	89.8728	58.435	121.311
ENSSSCG00000003301	PPP6R1	NO	0.819895	67.1882	49.818	81.7285	131.226	115.357	126.818	56.7571	83.2418	89.0168	80.2578	97.7758
ENSSSCG00000038631	TCFL5	NO	0.726769	49.517	59.8092	62.8696	107.369	111.763	115.087	84.5759	120.696	88.9609	77.1815	100.74
ENSSSCG00000006391	LOC100157711; ATP1A2	NO	0.663563	50.0996	39.2726	76.7987	147.029	136.331	119.171	41.5871	101.266	88.9443	76.204	101.685
ENSSSCG00000037288	YPEL1	NO	0.764537	67.3661	42.4085	66.6907	132.796	120.454	111.793	59.5982	107.521	88.5785	78.5273	98.6298
ENSSSCG00000016498	MKRN1	NO	0.754893	52.6402	44.2536	78.7576	150.833	121.138	115.309	51.9368	87.109	87.7471	76.1182	99.3761
ENSSSCG00000010900	DENND1B	NO	0.396171	65.2096	42.7959	67.9153	145.241	93.9218	103.066	62.4881	118.94	87.4472	72.3837	102.511
ENSSSCG00000022310	VPS9D1	NO	0.594263	71.5162	52.9062	72.8523	137.022	97.6	102.34	59.7331	104.894	87.358	75.4254	99.2905
ENSSSCG00000015080	CEP164	NO	0.973473	57.3459	36.276	78.6558	115.999	127.882	100.408	66.3798	106.607	86.1942	82.5659	89.8225
ENSSSCG00000032428	ARSA	NO	0.538635	75.0858	50.4086	68.6421	143.034	101.205	99.3139	46.4867	105.025	86.1501	72.8548	99.4455
ENSSSCG00000024437	AP2M1	NO	0.877877	78.5048	39.329	74.3639	132.918	110.426	99.312	58.8441	93.5537	85.9065	80.5347	91.2783
ENSSSCG00000023503	PRKCD	NO	0.627946	49.5655	32.9902	86.9507	133.778	119.264	124.605	48.7852	86.8052	85.343	76.1414	94.5447
ENSSSCG00000040543		NO	0.588013	64.5507	40.0386	103.96	200.641	77.0076	77.6427	36.5523	78.7822	84.8969	70.5176	99.2762
ENSSSCG00000007979	LUC7L	NO	0.983206	35.5498	32.3767	79.9649	99.1805	132.992	115.056	78.4856	103.322	84.6158	81.748	87.4837
ENSSSCG00000017177	ST6GALNAC2	NO	0.610743	36.0317	26.9385	113.856	165.202	77.7795	148.515	40.5322	67.0414	84.4871	67.0499	101.924
ENSSSCG00000003066	IRGC	NO	0.797504	78.0127	73.7269	64.9124	83.9177	95.6904	106.504	63.7091	104.86	83.9167	75.5811	92.2522
ENSSSCG00000032235	ARFGAP1	NO	0.935065	60.9927	67.2628	66.1447	92.2591	92.13	96.7333	83.0977	111.415	83.7543	75.5913	91.9174
ENSSSCG00000041114		NO	0.644919	57.8351	33.7118	63.7606	136.42	112.826	113.972	56.1536	95.3532	83.754	72.6439	94.8642
ENSSSCG00000022162	RAB11FIP5	NO	0.649689	57.6972	43.1746	76.1787	126.304	97.2432	102.099	59.1808	107.416	83.6616	72.575	94.7482
ENSSSCG00000039415	CCDC197	NO	0.401587	51.6374	35.0191	68.1382	140.058	134.054	140.915	30.7041	67.8006	83.5408	71.1334	95.9482
ENSSSCG00000012306	AKAP4	NO	0.920705	45.6974	20.2389	80.7199	140.001	104.395	117.038	57.2061	100.3	83.1996	72.0046	94.3946
ENSSSCG00000037098	C6H19orf81	NO	0.835985	47.1556	42.6415	90.4344	116.331	114.921	110.769	48.763	91.4829	82.8123	75.3186	90.306
ENSSSCG00000004002	RPS5	NO	0.949713	63.3795	47.0462	66.3181	108.293	107.229	90.2634	73.4827	103.289	82.4126	77.6022	87.2229
ENSSSCG00000014000	TRIM17	NO	0.781215	51.7077	30.1542	70.2951	134.491	117.486	112.694	50.2739	92.1235	82.4031	72.4407	92.3655
ENSSSCG00000003455	FHAD1	NO	0.307108	55.3129	22.8421	107.204	96.8212	119.859	90.6482	71.5618	91.593	81.9803	88.4844	75.4761
ENSSSCG00000007425	SNX21	NO	0.893322	48.04	39.645	81.1321	114.443	104.054	104.626	64.6052	98.5351	81.8852	74.4579	89.3125
ENSSSCG00000014877	LOC100511652	NO	0.591746	85.3229	36.8537	54.8967	146.747	75.0807	86.7723	51.0507	116.934	81.7073	66.5877	96.8268
ENSSSCG00000031686	FAM104A	NO	0.977699	61.5991	51.7496	76.4448	99.6128	105.973	103.788	68.0784	85.2281	81.5592	78.0237	85.0947
ENSSSCG00000003931	KIF2C	NO	0.822888	58.9167	35.1184	65.6868	117.085	130.688	120.927	43.0915	80.6325	81.5183	74.5959	88.4407
ENSSSCG00000018052	NT5M	NO	0.852882	60.1585	51.0106	85.6848	125.569	101.143	117.863	45.0616	60.6054	80.8869	73.0119	88.7619
ENSSSCG00000039538	MIEF1	NO	0.85217	54.6748	42.029	81.3083	114.105	113.641	109.856	46.5612	83.2671	80.6803	74.0463	87.3143
ENSSSCG00000000079	FAM83F	NO	0.924082	48.2695	41.9844	135.388	92.8145	91.5473	94.2515	63.1091	77.7419	80.6382	84.5784	76.6981
ENSSSCG00000023968	TSSK3	NO	0.564353	59.8449	54.5833	72.0986	95.6452	89.4952	135.578	43.3131	93.9521	80.5638	66.1879	94.9397
ENSSSCG00000029430	IPO13	NO	0.103112	34.0635	51.4456	51.5777	156.276	113.592	116.988	28.0588	90.8498	80.3565	56.8231	103.89
ENSSSCG00000001502	RPS18	NO	0.000527791	65.2072	16.6139	80.3931	53.9451	135.732	78.2968	145.186	67.2095	80.323	106.63	54.0163
ENSSSCG00000045959		NO	0.673803	50.8574	32.1942	84.0119	145.933	95.3048	108.038	43.552	80.3473	80.0298	68.4315	91.628
ENSSSCG00000039647	EIF3F	NO	0.580295	73.5826	51.8271	48.1337	99.4923	113.409	112.832	49.2549	90.6991	79.9039	71.0951	88.7126
ENSSSCG00000031738	COL24A1	NO	0.481505	64.5804	36.5231	44.4125	105.905	101.441	98.9778	56.9387	129.517	79.7869	66.8432	92.7305
ENSSSCG00000008515	MEMO1	NO	0.707047	54.7951	37.5266	71.5456	126.293	79.5344	85.146	68.8042	114.382	79.7534	68.6698	90.8369
ENSSSCG00000001689	GTPBP2	NO	0.7988	50.3064	33.9487	82.9263	130.155	103.41	104.739	44.5654	81.3471	78.9246	70.302	87.5473
ENSSSCG00000032820	BRD1	NO	0.962891	68.5798	69.1682	95.471	69.4695	66.5343	122.351	78.934	59.5012	78.7511	77.3798	80.1224
ENSSSCG00000007087	BANF2	NO	0.94507	53.6973	25.0245	64.9105	120.441	89.4414	98.8038	64.5833	112.698	78.6999	68.1581	89.2417
ENSSSCG00000022784	PLEKHO1	NO	0.724175	41.0437	24.4898	77.5434	138.204	124.016	104.813	43.6788	75.347	78.642	71.5704	85.7135
ENSSSCG00000038718	ADRM1	NO	0.88972	55.8403	70.227	78.61	93.4975	84.7613	106.767	65.9265	73.4744	78.638	71.2845	85.9915
ENSSSCG00000006260	LYPLA1	NO	0.737721	44.6239	39.7307	75.0963	106.982	107.324	114.563	49.2157	91.0426	78.5723	69.0649	88.0797
ENSSSCG00000043690		NO	0.985308	48.2627	181.62	85.6911	47.5241	67.9378	88.0705	69.0109	35.7235	77.98	67.7256	88.2345
ENSSSCG00000009569	PSPC1	NO	0.669415	73.7193	33.7963	42.6492	72.8079	43.9446	72.7701	80.9361	197.466	77.2611	60.3123	94.21
ENSSSCG00000038474	AURKAIP1	NO	0.942925	49.9562	36.2276	45.7792	74.4039	126.115	112.713	70.5779	101.568	77.1675	73.107	81.2281
ENSSSCG00000018065	ND1	NO	0.221191	183.332	119.862	31.4298	0	29.2361	0	251.84	0	76.9625	123.959	29.9656
ENSSSCG00000001527	ILRUN	NO	0.724715	57.4901	45.6212	59.4859	109.041	86.9748	88.5256	66.9786	101.219	76.9169	67.7323	86.1015
ENSSSCG00000034570	IFI6	NO	0.934283	57.4744	45.3163	59.5292	93.5872	97.736	87.3693	72.0823	102.032	76.8909	71.7055	82.0763
ENSSSCG00000050383	P3R3URF	NO	0.865973	70.7702	43.3	60.7131	102.903	110.398	90.2204	42.3687	93.1758	76.7312	71.0626	82.3999
ENSSSCG00000009310	POLR1D	NO	0.872436	46.4475	35.47	84.5663	86.417	117.389	108.699	62.2601	69.3542	76.3254	77.6658	74.9851
ENSSSCG00000002986	SELENOV	NO	0.825172	59.9239	47.1117	61.1885	93.0786	107.501	104.999	49.9063	86.2008	76.2387	69.6298	82.8476
ENSSSCG00000008607	LOC100516797	NO	0.877877	40.0601	21.3828	68.1364	124.129	118.291	112.111	45.7624	79.2005	76.1342	68.0625	84.2058
ENSSSCG00000009631	PEBP4	NO	0.836045	41.1995	24.0226	75.7485	132.029	102.556	95.2215	42.6222	85.548	74.8684	65.5316	84.2053
ENSSSCG00000031837	CMTM2	NO	0.00683228	80.208	14.6263	105.407	73.5971	148.942	115.259	36.449	23.7808	74.7837	92.7514	56.8159
ENSSSCG00000032242	HMGA1	NO	0.515605	59.7537	41.5463	71.5691	143.73	80.7855	85.5192	39.4813	75.8492	74.7793	62.8974	86.6611
ENSSSCG00000016414	RNF32	NO	0.408255	48.2364	27.7797	61.4808	145.788	105.632	82.9286	32.9064	92.8747	74.7033	62.0638	87.3428
ENSSSCG00000025416	CAMKV	NO	0.782266	55.3635	42.1396	71.2394	109.412	106.69	96.5713	39.8321	75.9166	74.6456	68.2813	81.01
ENSSSCG00000014880	AQP11	NO	0.726336	51.2617	46.0338	69.5186	115.8	102.797	103.421	41.3478	66.9419	74.6402	66.2313	83.049
ENSSSCG00000008240	SH2D6	NO	0.590666	34.1615	30.3271	85.5464	154.631	76.869	73.4323	45.3322	95.2364	74.442	60.4773	88.4067
ENSSSCG00000017190	EXOC7	NO	0.67772	39.0469	31.9166	48.5337	128.359	112.445	114.348	43.9419	73.8576	74.0562	60.9919	87.1205
ENSSSCG00000040579	ZNF683	NO	0.763307	35.8329	20.9411	67.4441	117.174	105.441	111.407	45.0357	88.2495	73.9408	63.4384	84.4431
ENSSSCG00000017941	NEURL4	NO	0.481505	53.104	41.1279	73.5409	137.955	77.5558	79.4264	41.8268	85.7664	73.7879	61.5069	86.0689
ENSSSCG00000014002	THEG	NO	0.314098	34.7369	23.6033	50.0486	116.149	86.1687	90.9708	61.0398	126.911	73.7035	57.9985	89.4085
ENSSSCG00000040352	DUS1L	NO	0.703705	46.248	34.9146	61.3535	103.673	103.359	105.262	45.5376	84.8467	73.1493	64.1245	82.1742
ENSSSCG00000003633	TEKT2	NO	0.763307	47.3783	34.0036	74.0946	129.614	89.3523	79.4837	42.4593	85.0854	72.6838	63.3211	82.0466
ENSSSCG00000008239	CAPG	NO	0.594263	51.5121	30.0553	63.6194	144.75	85.4535	93.6799	53.6457	57.5669	72.5353	63.5577	81.513
ENSSSCG00000000820	H1-7	NO	0.871339	52.4968	27.4113	92.69	120.183	95.6039	83.2788	43.0175	65.0607	72.4677	70.952	73.9834
ENSSSCG00000040714	RSPH6A	NO	0.616624	66.9097	44.2089	55.4502	99.556	91.2396	92.459	41.4736	87.242	72.3174	63.7683	80.8665
ENSSSCG00000031838	RPS27	NO	0.00476503	64.4287	14.082	63.8891	49.5559	129.461	99.6212	111.622	44.5225	72.1478	92.3503	51.9454
ENSSSCG00000021672	WBP2	NO	0.93117	40.0525	31.9453	82.2362	114.365	90.8646	109.814	54.3203	49.6568	71.6568	66.8684	76.4453
ENSSSCG00000017317	WNT3	NO	0.819895	49.8154	40.4776	65.3457	95.8703	89.8236	87.4939	53.0696	91.2113	71.6384	64.5136	78.7633
ENSSSCG00000003551	PAQR7	NO	0.214011	49.8727	50.0526	66.2625	106.816	96.848	128.085	17.5594	56.2357	71.4665	57.6357	85.2974
ENSSSCG00000000058	SNU13	NO	0.742095	31.5679	27.6254	61.7716	108.172	112.351	99.9719	43.8461	80.982	70.786	62.3842	79.1878
ENSSSCG00000003971	SCMH1	NO	0.0719812	55.0255	40.2655	48.9638	126.827	77.3086	84.1861	41.3713	91.847	70.7243	55.6673	85.7813
ENSSSCG00000024568	LOC110260994	NO	0.916518	41.5167	24.0459	81.3226	123.175	85.4442	86.4466	43.0855	77.9184	70.3693	62.8422	77.8964
ENSSSCG00000027165	UBE2G2	NO	0.307108	75.3603	60.6046	47.7461	94.7878	77.1097	81.5539	37.3992	88.0114	70.3216	59.4038	81.2394
ENSSSCG00000038854	PSMF1	NO	0.448089	48.8813	41.271	51.6568	100.32	92.8515	100.402	43.3737	83.3304	70.2608	59.1908	81.3308
ENSSSCG00000017810	TLCD3A	NO	0.798395	59.1123	38.7593	57.8093	107.611	103.686	95.1939	36.8125	62.752	70.2171	64.355	76.0792
ENSSSCG00000035064	LOC110260835	NO	0.43639	46.4427	32.2907	44.7878	98.6923	80.326	79.5515	56.8709	120.083	69.8806	57.1069	82.6544
ENSSSCG00000017938	YBX2	NO	0.974367	41.889	41.9604	60.8032	74.3716	89.8201	100.28	71.4535	75.0617	69.4549	65.9914	72.9184
ENSSSCG00000039678	TMEM269	NO	0.317509	43.0175	43.6067	51.4828	97.8294	87.5918	102.264	41.6135	88.1235	69.4412	55.9264	82.9559
ENSSSCG00000006564	RAB13	NO	0.385282	17.8692	9.0582	92.7263	52.7054	133.423	119.669	66.6616	62.2607	69.2968	77.6701	60.9234
ENSSSCG00000010304	MYOZ1	NO	0.79589	36.7692	23.5177	58.8503	104.079	94.5099	104.129	51.9556	79.8607	69.209	60.5213	77.8966
ENSSSCG00000008651	DCDC2C	NO	0.302317	64.501	33.5581	47.3371	123.606	68.1242	78.8272	36.9507	99.7235	69.0785	54.2283	83.9288
ENSSSCG00000023994	ARMC9	NO	0.0414759	40.8016	29.2959	57.5329	139.287	87.4697	96.5078	29.4513	71.4208	68.9709	53.8139	84.128
ENSSSCG00000029785	RPS9	NO	0.0219164	77.8017	13.5917	55.4554	66.6546	111.927	55.327	85.8316	83.0552	68.7056	82.754	54.6571
ENSSSCG00000017169	SEC14L1	NO	0.780834	48.1045	37.8249	67.8967	108.396	76.5272	83.9634	47.5766	73.1422	67.929	60.0262	75.8317
ENSSSCG00000032003	LOC100739163; LOC100739508	NO	0.96952	22.9764	38.7253	52.4043	277.741	48.8131	32.5702	19.4119	44.5335	67.147	35.9014	98.3926
ENSSSCG00000038639	TOM1L2	NO	0.9061	48.6307	43.7309	72.4464	94.1714	70.4015	80.2394	53.623	71.3718	66.8269	61.2754	72.3784
ENSSSCG00000001346	ABCF1	NO	0.938783	36.9102	20.1263	71.4906	106.38	105.691	89.7933	40.7775	63.4435	66.8266	63.7174	69.9358
ENSSSCG00000001738	PGK2	NO	0.975007	47.1119	25.3879	62.3156	105.672	97.481	82.4222	45.0218	67.4791	66.6114	62.9826	70.2403
ENSSSCG00000012817	FUNDC2	NO	0.84062	52.7525	45.5559	75.2841	73.1908	81.9188	67.5371	65.1764	69.4283	66.3555	68.7829	63.9281
ENSSSCG00000028166	ODF4	NO	0.858907	49.6224	56.4913	76.8023	126.683	78.9009	68.5658	54.5658	18.9845	66.3269	64.9728	67.681
ENSSSCG00000003747	KIAA1328	NO	0.84062	66.6474	35.8391	49.3142	108.17	65.5595	58.1347	54.5412	92.2997	66.3133	59.0156	73.6109
ENSSSCG00000016349	NDUFA10	NO	0.904456	14.7345	4.71745	59.3608	135.693	127.62	121.885	21.8326	44.5537	66.2996	55.887	76.7121
ENSSSCG00000026686	PDZD9	NO	0.99841	48.0378	36.7915	57.6375	69.3025	89.9857	91.6979	58.793	77.8355	66.2602	63.6135	68.9068
ENSSSCG00000008121	GPAT2	NO	0.480103	48.2534	32.8624	61.2608	127.562	79.495	79.9476	31.3088	66.0832	65.8467	55.0795	76.6139
ENSSSCG00000032549	GNA12	NO	0.483765	46.2026	37.3304	58.7387	110.139	80.952	84.1183	36.2406	70.2857	65.501	55.5335	75.4685
ENSSSCG00000026701	PHOSPHO1	NO	0.509546	48.1166	30.2429	44.4194	82.3079	90.3211	107.242	44.7407	73.6593	65.1313	56.8995	73.363
ENSSSCG00000013605	ACTL9	NO	0.786931	51.7317	35.0302	56.2044	112.667	86.679	68.6296	34.4673	70.9374	64.5434	57.2706	71.8161
ENSSSCG00000000174	TEX49	NO	0.604363	50.63	33.5521	62.4806	119.017	74.2624	86.4004	28.7031	61.0106	64.507	54.019	74.9949
ENSSSCG00000002000	IPO4	NO	0.739301	48.866	31.7721	56.8653	97.1748	87.5742	85.1098	36.24	70.8213	64.3029	57.3864	71.2195
ENSSSCG00000013934	CILP2	NO	0.766765	41.7906	24.6085	57.3836	102.88	89.1426	86.2226	37.8228	73.8667	64.2147	56.5349	71.8945
ENSSSCG00000008170	RPL31	NO	0.0626503	56.4566	9.68722	42.532	64.3702	138.163	72.8154	96.2467	32.4199	64.0864	83.3496	44.8232
ENSSSCG00000003917	TESK2	NO	0.559984	49.9924	28.2632	62.4785	103.893	58.2026	80.5061	54.9757	72.7928	63.888	56.4123	71.3637
ENSSSCG00000024895	GGA1	NO	0.837184	41.4653	31.3164	58.8321	88.7209	90.8965	90.2242	40.8507	66.7252	63.6289	58.0111	69.2466
ENSSSCG00000017909	CHRNE	NO	0.712768	29.7476	25.6611	59.3327	92.1155	99.6482	100.28	34.3501	66.5036	63.4549	55.7696	71.1401
ENSSSCG00000038234	TMEM175	NO	0.0487403	63.837	52.5391	27.7344	58.1352	61.519	103.918	38.762	99.2925	63.2171	47.9631	78.4712
ENSSSCG00000033033	TOLLIP	NO	0.978755	50.5407	57.4384	51.0132	66.5409	97.809	70.6733	53.2423	56.9171	63.0219	63.1513	62.8924
ENSSSCG00000033272	DNAJB6	NO	0.780122	60.9878	28.6021	39.1001	109.577	65.5134	67.1059	46.6386	84.6135	62.7672	53.06	72.4745
ENSSSCG00000033655	LOC100624785; TUBB2B	NO	0.795647	49.3865	39.6055	143.4	72.2982	26.7359	36.3841	72.9336	61.1445	62.736	73.114	52.3581
ENSSSCG00000023380	ISCU	NO	0.984857	29.4665	28.9233	62.2357	100.981	55.3159	75.6623	61.421	86.5823	62.5735	52.1097	73.0372
ENSSSCG00000025228	TRAF3IP1	NO	0.871339	50.0994	42.302	51.1123	78.915	63.4086	61.1613	62.8186	88.3448	62.2702	56.8597	67.6808
ENSSSCG00000027389	HERPUD2	NO	0.793762	37.5825	33.8076	57.1518	86.8308	71.7691	85.6622	51.8245	72.295	62.1154	54.582	69.6489
ENSSSCG00000028983	TBC1D1	NO	0.964127	32.4216	26.9245	59.5561	81.177	97.4442	113.538	38.6468	45.9836	61.9615	57.0172	66.9058
ENSSSCG00000016509	LOC102162486	NO	0.0638492	54.3118	17.5923	82.4392	71.9971	91.2473	67.2401	44.9419	64.4761	61.7807	68.235	55.3264
ENSSSCG00000023912	ORAI2	NO	0.425534	26.8709	22.4302	59.0498	113.667	75.7575	77.9303	38.0744	80.0029	61.7228	49.9381	73.5075
ENSSSCG00000014691	UBQLN3	NO	0.699667	31.2319	16.1289	57.6053	105.617	88.205	103.026	29.3705	60.5592	61.468	51.6032	71.3328
ENSSSCG00000017136	TBCD	NO	0.532115	60.4195	49.4508	44.2889	84.1705	73.6037	72.2686	36.1242	71.0944	61.4276	53.6091	69.2461
ENSSSCG00000015052	USP28	NO	0.748281	26.6724	20.7548	56.7976	93.1807	84.2442	97.7211	43.9265	67.2376	61.3169	52.9102	69.7235
ENSSSCG00000030361	PRKCZ	NO	0.506296	31.5026	29.754	54.5394	96.9863	79.7597	93.6692	30.2128	72.4031	61.1034	49.0036	73.2031
ENSSSCG00000014428	HTR4	NO	0.30797	50.3844	31.1076	36.2949	86.7397	74.1135	68.0072	35.7696	106.093	61.0637	49.1406	72.9868
ENSSSCG00000042403		NO	0.835274	71.0781	56.7108	77.1866	74.2012	30.4168	41.8956	42.6391	92.2475	60.797	55.3301	66.2638
ENSSSCG00000005659	ZER1	NO	0.458448	49.7028	32.3145	44.3368	103.768	74.6092	82.3186	33.2041	63.9368	60.5238	50.4632	70.5845
ENSSSCG00000030395	ASB5	NO	0.978444	40.009	19.3763	67.2959	102.101	76.7397	75.9256	35.8243	65.4901	60.3452	54.9672	65.7232
ENSSSCG00000012837	CHID1	NO	0.720058	31.3741	31.7167	39.3752	85.3698	84.8861	93.8851	45.8391	68.419	60.1081	50.3686	69.8476
ENSSSCG00000016340	ASB1	NO	0.779717	67.5253	94.4185	21.4877	92.5231	93.85	80.4766	11.7079	18.7878	60.0971	48.6427	71.5515
ENSSSCG00000030480	DYRK1A	NO	0.673754	41.9651	34.7784	52.7155	74.1707	54.0164	69.2077	69.5905	83.7173	60.0202	54.5719	65.4685
ENSSSCG00000039188	AK8	NO	0.596315	38.5195	24.5136	49.8283	110.941	77.9238	74.1687	35.0046	68.977	59.9846	50.3191	69.6502
ENSSSCG00000005716	POMT1	NO	0.844637	45.6583	23.9274	55.1408	110.893	74.1287	57.171	36.8674	73.6009	59.6735	52.9488	66.3981
ENSSSCG00000018028	TEKT3	NO	0.742095	26.2579	19.5993	54.0503	90.5132	81.753	94.6672	43.0827	66.0027	59.4908	51.286	67.6956
ENSSSCG00000034768	CYTH3	NO	0.804412	38.8851	24.5211	54.2948	95.1376	67.0122	70.1962	48.6082	77.103	59.4698	52.2001	66.7395
ENSSSCG00000047335		NO	0.337154	38.8854	30.488	36.268	77.506	88.6784	94.9643	35.0281	73.3508	59.3961	49.715	69.0773
ENSSSCG00000013551	C3	NO	0.553982	21.7164	14.4074	67.3868	125.395	78.2379	83.2669	27.7232	56.9506	59.3855	48.7661	70.005
ENSSSCG00000031776	TULP4	NO	0.135696	45.5971	36.0846	46.259	104.749	54.9591	60.0976	34.5313	90.8347	59.1391	45.3366	72.9415
ENSSSCG00000027989	FAM187B	NO	0.341922	39.2155	26.215	36.8454	81.1543	59.3487	72.1112	52.8679	104.368	59.0157	47.0693	70.962
ENSSSCG00000018091	ND5	NO	0.77013	113.544	0.143084	66.7705	7.53813	91.3475	64.3097	128.089	0	58.9678	99.9378	17.9977
ENSSSCG00000022744	PRSS21	NO	0.642078	42.0861	23.6203	62.8711	121.36	65.4029	81.3405	25.9761	48.9128	58.9462	49.0841	68.8084
ENSSSCG00000013776	DDX39A	NO	0.423597	43.4553	26.8818	40.0687	87.1903	76.8454	87.1331	34.5788	73.5098	58.7079	48.737	68.6788
ENSSSCG00000028755	EIPR1	NO	0.705821	38.181	29.098	43.8065	67.7525	78.8606	73.7398	41.4808	93.1575	58.2596	50.5822	65.9369
ENSSSCG00000017942		NO	0.973009	39.1448	146.017	76.4548	29.8956	0	0.199819	173.501	0.720915	58.2418	72.2752	44.2083
ENSSSCG00000015891	TBR1	NO	0.86575	37.6394	50.2926	54.198	79.0655	71.3493	69.0731	47.8514	55.9505	58.1775	52.7595	63.5954
ENSSSCG00000039881	GLI4	NO	0.804085	55.7581	37.7351	54.106	90.1242	63.8387	61.6103	27.756	72.8106	57.9674	50.3647	65.57
ENSSSCG00000016412	LMBR1	NO	0.151082	47.1883	36.3526	39.094	82.0856	55.442	71.8101	41.0359	90.2241	57.9041	45.6901	70.1181
ENSSSCG00000039424	MCRIP1	NO	0.970453	39.8734	40.3102	68.4538	66.3213	80.4293	68.5691	36.9805	62.2395	57.8971	56.4343	59.36
ENSSSCG00000000766	CECR2	NO	0.591746	46.2822	29.5137	43.8537	100.57	58.0324	57.9518	42.3359	84.0089	57.8186	47.626	68.0111
ENSSSCG00000016590	SND1	NO	0.831373	35.7518	18.3663	56.8296	103.607	71.9422	69.7004	35.6112	70.12	57.7411	50.0337	65.4484
ENSSSCG00000003230	CLDND2	NO	0.95087	50.9494	25.7947	45.6777	76.771	67.9292	84.9394	48.8599	60.7101	57.7039	53.3541	62.0538
ENSSSCG00000036308	PGS1	NO	0.653033	45.4308	36.9629	48.4441	87.8319	70.1005	68.152	36.9597	66.97	57.6065	50.2338	64.9792
ENSSSCG00000007373	GDAP1L1	NO	0.821709	64.0331	58.5212	20.5184	96.9543	35.9204	86.7561	61.5248	36.3887	57.5771	45.4992	69.6551
ENSSSCG00000038037	SPTY2D1OS	NO	0.803645	25.7312	9.2406	55.3101	83.6312	95.1637	74.1792	52.834	64.5128	57.5753	57.2598	57.8909
ENSSSCG00000007168	PCED1A	NO	0.300816	29.5873	32.128	40.5189	94.5848	86.2047	83.4942	29.7783	62.0899	57.2983	46.5223	68.0742
ENSSSCG00000021106	GRIPAP1	NO	0.189231	43.2745	25.7628	35.1155	85.2043	58.0283	69.4018	45.0688	95.783	57.2049	45.3718	69.038
ENSSSCG00000045920		NO	0.910141	0	0	411.042	46.3281	0.140191	0	0.097843	0	57.2011	102.82	11.582
ENSSSCG00000020790	COPS9	NO	0.649689	75.882	48.0998	33.6412	104.046	62.1834	48.4119	25.3835	59.754	57.1752	49.2725	65.0779
ENSSSCG00000027294	CDV3	NO	0.776556	46.0615	49.8549	70.4529	47.4378	62.1097	64.92	71.5134	42.1499	56.8125	62.5344	51.0907
ENSSSCG00000002284	CCDC196	NO	3.64e-06	45.3322	6.97871	98.5804	58.4575	96.1968	52.7884	62.1086	33.3764	56.7274	75.5545	37.9002
ENSSSCG00000050244		NO	0.893962	38.9237	25.2921	47.1944	78.854	77.6367	82.6572	42.4995	59.192	56.5312	51.5636	61.4988
ENSSSCG00000002957	GGN	NO	0.921569	46.9557	47.6107	43.5799	72.8614	82.4775	75.3607	39.8158	43.4829	56.5181	53.2072	59.8289
ENSSSCG00000031571	LOC100520991	NO	0.925004	45.7276	47.9221	55.4545	50.6596	49.3613	74.3473	55.5659	71.1724	56.2763	51.5273	61.0253
ENSSSCG00000010928	KDM5B	NO	0.702885	50.4673	28.4797	42.3357	83.8332	63.1318	62.1768	41.1702	77.9825	56.1972	49.2763	63.1181
ENSSSCG00000024864	ATXN10	NO	0.699667	41.6933	26.5893	40.032	86.6442	72.8504	59.4169	37.4494	84.7442	56.1775	48.0063	64.3487
ENSSSCG00000031307		NO	0.702885	40.1679	36.8452	49.0055	76.6255	69.5835	74.7612	36.9503	65.2759	56.1519	48.9268	63.3769
ENSSSCG00000003149	TULP2	NO	0.640421	31.0264	26.9783	42.9803	74.4941	72.3005	82.2619	38.45	79.6412	56.0166	46.1893	65.8439
ENSSSCG00000007585	ACTB	NO	0.754893	47.6026	20.793	39.4221	68.2976	67.9412	61.4537	68.0472	71.1585	55.5895	55.7533	55.4257
ENSSSCG00000003575	CD164L2	NO	0.83424	38.7698	19.9542	50.4393	102.187	62.5938	56.4646	39.4096	74.7875	55.5757	47.8031	63.3482
ENSSSCG00000035581	SUGCT	NO	0.0718592	42.208	29.1341	67.8567	90.2679	45.0914	57.5546	33.3452	76.0852	55.1929	47.1253	63.2605
ENSSSCG00000001762	CIB2	NO	0.707047	29.0114	17.2837	71.8179	117.472	60.7554	68.653	22.2108	53.7626	55.1209	45.9489	64.2929
ENSSSCG00000002623	GSTA1	NO	0.0969816	99.7371	47.4459	45.5902	6.49285	80.8609	10.2096	150.318	0.14878	55.1004	94.1264	16.0743
ENSSSCG00000004177	RPS12	NO	0.00582071	59.8839	11.3406	60.2445	53.2903	87.4174	59.7833	66.2687	42.4988	55.0909	68.4536	41.7282
ENSSSCG00000002251	LOC100518318	NO	0.996714	26.1831	9.83128	46.6723	81.4483	60.763	63.2843	55.8185	95.3882	54.9236	47.3592	62.488
ENSSSCG00000035967	ZC3H18	NO	0.609786	43.6045	53.0478	43.5079	69.7947	54.169	61.8639	43.1842	70.1557	54.9159	46.1164	63.7155
ENSSSCG00000000753	WNK1	NO	0.856572	32.3059	22.1532	49.0878	79.9463	77.0222	83.2799	39.1243	55.7193	54.8299	49.3851	60.2747
ENSSSCG00000010014	C5orf52	NO	0.881364	45.9251	11.8451	44.7859	103.258	51.2886	85.168	33.8255	62.4669	54.8203	43.9563	65.6844
ENSSSCG00000033385	KIAA1671	NO	0.438345	56.9547	26.7548	47.7951	73.7116	50.2541	59.8617	56.842	65.2742	54.681	52.9615	56.4006
ENSSSCG00000039506	MYL6B; MYL6	NO	0.909039	44.929	17.6154	18.3842	46.4734	88.965	63.1933	77.2003	79.2281	54.4986	57.3696	51.6275
ENSSSCG00000011408	ZMYND10	NO	0.803012	29.2004	16.9935	53.5342	92.3986	71.2356	76.1123	34.7866	59.7303	54.2489	47.1892	61.3087
ENSSSCG00000011376	IHO1	NO	0.43639	36.8724	21.137	40.5878	82.7351	59.1489	79.1318	38.6165	74.474	54.0879	43.8064	64.3695
ENSSSCG00000010773	TUBGCP2	NO	0.68897	30.3722	23.9959	50.4157	89.2582	68.044	59.2343	32.8792	74.0608	53.5325	45.4278	61.6373
ENSSSCG00000024736	ACP4	NO	0.811029	29.1173	24.1744	65.8299	91.1806	78.0902	74.997	20.2692	42.5928	53.2814	48.3267	58.2362
ENSSSCG00000013065	ASRGL1	NO	0.726306	35.9504	19.9569	40.4781	84.4865	58.1116	72.1122	45.9042	69.0483	53.256	45.1111	61.401
ENSSSCG00000000999	CDYL	NO	0.996213	36.9811	32.9814	46.026	84.8963	69.765	73.9373	45.7031	35.176	53.1833	49.6188	56.7478
ENSSSCG00000017543	CALCOCO2	NO	0.828564	52.198	21.6404	44.9833	78.6163	56.209	59.1289	51.5686	57.7802	52.7656	51.2397	54.2914
ENSSSCG00000035956	HABP4	NO	0.81165	31.4286	21.7188	46.2406	81.073	66.0751	68.0888	42.824	64.3396	52.7236	46.6421	58.805
ENSSSCG00000029226	UBC	NO	0.205146	23.8575	1.02439	74.0449	13.3594	138.274	118.839	41.0017	10.5537	52.6192	69.2944	35.944
ENSSSCG00000017278	TEX2	NO	0.99841	63.2185	38.7414	16.9577	21.4285	66.0933	63.9075	56.7369	92.6642	52.4685	50.7516	54.1854
ENSSSCG00000007540	CABLES2	NO	0.727108	46.5179	36.7491	44.3053	76.0499	75.3851	64.4278	23.5903	50.2018	52.1534	47.4497	56.8572
ENSSSCG00000011340	SMARCC1	NO	0.794301	46.2564	15.1598	43.376	82.0838	51.5878	63.746	44.2532	70.0136	52.0596	46.3683	57.7508
ENSSSCG00000040278	IFITM5	NO	0.633966	39.8796	44.9467	34.6676	65.2803	74.714	67.1206	30.0777	59.2089	51.9869	44.8347	59.1391
ENSSSCG00000035118	BRD9	NO	0.940547	36.5586	29.0219	59.3998	72.2297	65.1665	59.6779	33.9143	59.7608	51.9662	48.7598	55.1726
ENSSSCG00000031707	CTDSP2	NO	0.893475	31.8569	26.6496	38.0217	66.5088	67.4154	62.9463	73.8621	47.3222	51.8229	52.789	50.8567
ENSSSCG00000017357	ITGA2B; GPATCH8	NO	0.983993	42.5268	9.35572	46.947	83.5465	60.1764	70.7522	29.6829	70.8611	51.7311	44.8333	58.6289
ENSSSCG00000040624	REXO1	NO	0.430111	17.8893	15.3499	42.4094	83.5346	82.0161	86.1345	29.5889	56.0711	51.6242	42.9759	60.2725
ENSSSCG00000003192	IL4I1	NO	0.778583	32.7153	23.2494	48.5687	85.4254	67.169	62.9587	34.5421	57.9065	51.5669	45.7488	57.385
ENSSSCG00000017057	FAM71B	NO	0.643906	33.3173	24.4958	46.5041	88.2384	50.9362	43.2567	35.7108	89.5866	51.5057	41.6171	61.3944
ENSSSCG00000021645	MROH2B	NO	0.554299	27.1256	14.6615	40.7443	91.5521	78.069	79.1786	23.8207	54.119	51.1588	42.4399	59.8778
ENSSSCG00000022508	UIMC1	NO	0.352536	98.4138	0	100.853	0	109.119	100.457	0	0	51.1055	77.0966	25.1143
ENSSSCG00000015586	RPS6KC1	NO	0.779717	47.5474	16.488	33.7268	93.1978	59.2709	48.7954	34.3582	74.2936	50.9598	43.7258	58.1937
ENSSSCG00000032608	LOC100511430	NO	0.204205	72.8835	15.4897	61.0272	61.059	67.6897	65.9845	37.3911	26.1519	50.9596	59.7479	42.1713
ENSSSCG00000034725	UBE2R2	NO	0.737721	39.5733	34.0416	48.7535	77.592	59.8746	62.9942	31.7979	52.7101	50.9171	44.9998	56.8345
ENSSSCG00000035666	C20orf27	NO	0.787296	41.252	25.1735	39.377	67.6844	68.2645	66.2358	34.4778	64.8012	50.9083	45.8428	55.9737
ENSSSCG00000040763	LOC110259338	NO	0.699667	29.7315	14.6228	46.8479	75.8867	49.2818	66.5937	43.7544	78.4264	50.6431	42.4039	58.8824
ENSSSCG00000013602	HNRNPM	NO	0.84973	41.102	13.2268	45.4424	69.765	73.8933	72.3903	35.251	53.6725	50.5929	48.9222	52.2636
ENSSSCG00000007985	PGAP6	NO	0.636608	39.0324	32.9908	47.7471	86.8696	71.361	73.6532	1.04897	50.5572	50.4075	39.7974	61.0177
ENSSSCG00000003030	CIC	NO	0.609016	21.8894	18.0599	70.389	110.861	66.9352	54.9925	15.8508	42.5599	50.1922	43.7661	56.6183
ENSSSCG00000000623	BCL2L14	NO	0.627909	23.2243	13.9859	40.4322	80.2835	76.7288	79.7167	30.0384	57.0213	50.1789	42.6059	57.7519
ENSSSCG00000030149	CAPNS1	NO	0.90142	41.9784	24.0633	47.7166	76.3293	59.342	63.6028	33.9775	53.4772	50.0609	45.7536	54.3682
ENSSSCG00000003477	NECAP2	NO	0.627162	28.7193	20.3781	28.6475	107.797	48.46	61.8649	55.2609	47.3847	49.8141	40.2719	59.3563
ENSSSCG00000017314	SPPL2C	NO	0.739301	33.7292	24.2061	41.9066	67.0486	67.8292	71.0718	31.6261	60.7216	49.7674	43.7728	55.762
ENSSSCG00000005343	RNF38	NO	0.733009	32.6989	17.9317	52.6983	84.5245	54.5946	70.6665	28.8682	55.67	49.7066	42.215	57.1982
ENSSSCG00000016720	PGAM2	NO	0.943173	41.2467	29.5289	45.3319	61.2711	54.2572	46.6837	42.3678	76.5707	49.6573	45.8009	53.5136
ENSSSCG00000003965	CCDC30	NO	0.917677	41.2026	14.1049	28.1263	80.8652	56.6719	86.0424	33.7511	55.6356	49.55	39.938	59.162
ENSSSCG00000009885	HECTD4	NO	0.616402	29.4169	19.419	43.4232	80.7703	74.3045	77.9071	25.1425	45.517	49.4876	43.0718	55.9034
ENSSSCG00000017712	AP2B1	NO	0.962891	15.3014	7.0143	33.6387	85.5209	82.6664	84.7211	22.3544	64.6295	49.4808	38.4902	60.4715
ENSSSCG00000000066	L3MBTL2	NO	0.754893	41.2894	34.07	60.9995	89.894	49.6607	48.136	22.4226	49.1732	49.4557	43.593	55.3183
ENSSSCG00000001698	CAPN11	NO	0.47019	26.6711	17.5304	45.6108	88.7745	69.8569	68.3695	21.5123	56.8395	49.3956	40.9128	57.8785
ENSSSCG00000017747	RAB11FIP4	NO	0.794301	51.6995	15.8618	38.8748	46.7528	68.7693	80.0773	50.8733	42.1954	49.388	52.5542	46.2218
ENSSSCG00000032190	C8H4orf36	NO	0.972963	0	25.9113	54.2641	114.714	95.2453	2.72356	36.1622	64.1415	49.1453	46.4179	51.8726
ENSSSCG00000003488	UBR4	NO	0.636216	29.234	18.7816	43.5984	82.895	72.081	70.9441	25.3971	48.5277	48.9324	42.5776	55.2871
ENSSSCG00000021024	ASB8	NO	0.951039	31.2343	19.991	56.0905	88.33	65.083	56.5812	26.1084	45.1022	48.5651	44.629	52.5011
ENSSSCG00000013856	AP1M1	NO	0.643906	27.6798	17.4438	50.2496	87.9703	63.01	75.0238	23.1182	43.8284	48.5405	41.0144	56.0666
ENSSSCG00000002508	SETD3	NO	0.395711	21.7319	23.0974	43.0854	85.7951	43.6387	100.74	23.2436	45.7044	48.3795	32.9249	63.8342
ENSSSCG00000008635	NOL10	NO	0.819895	45.5532	26.3102	34.3626	65.6273	46.1961	44.2361	46.3783	78.146	48.3512	43.1225	53.5799
ENSSSCG00000032748	SWI5	NO	0.679865	29.7993	22.5464	37.6294	68.7817	49.3236	56.2807	44.2381	76.2102	48.1012	40.2476	55.9547
ENSSSCG00000030371	SERPINA3-2; LOC100156325; LOC100153899	NO	0.696907	21.7154	22.7709	64.1099	96.4222	37.8856	38.5704	33.547	65.7779	47.5999	39.3145	55.8854
ENSSSCG00000005439	ACTL7A	NO	0.562415	29.4763	16.019	39.0563	89.1782	63.7636	64.6751	22.2035	56.4199	47.599	38.6249	56.5731
ENSSSCG00000010931	KLHL12; ADIPOR1	NO	0.779142	38.0999	14.0272	46.4586	87.9594	49.9633	60.7834	19.6472	61.1357	47.2593	38.5422	55.9765
ENSSSCG00000000406	PTGES3	NO	0.978723	42.743	21.4049	39.9194	64.9815	49.7398	52.5382	44.9388	60.3307	47.0745	44.3352	49.8138
ENSSSCG00000007568	IQCE	NO	0.877877	36.07	21.5014	48.104	55.9559	64.2963	45.2213	37.6006	66.2575	46.8759	46.5177	47.234
ENSSSCG00000014794	NUP98	NO	0.282327	26.8102	16.0714	39.9742	90.8252	48.7662	55.0921	32.759	64.3767	46.8344	37.0774	56.5914
ENSSSCG00000004027	PDE10A	NO	0.376423	32.4823	19.5882	34.3642	79.6656	57.5545	64.9399	28.4353	56.3947	46.6781	38.2091	55.1471
ENSSSCG00000024379	PCSK4	NO	0.258902	26.5494	17.191	33.3897	74.9427	77.1383	87.4262	14.3351	42.3444	46.6646	37.8531	55.4761
ENSSSCG00000006732	TRIM45	NO	0.470197	28.4492	18.9095	38.3733	78.2691	62.2008	70.8577	18.9566	56.9877	46.6255	36.995	56.256
ENSSSCG00000051135	TXNDC2	NO	0.92279	25.1197	6.32144	35.4496	71.596	54.5928	73.7934	31.5007	73.0553	46.4286	36.6657	56.1915
ENSSSCG00000013155	CNTF; ZFP91	NO	0.835974	36.0872	14.8424	38.3742	77.0107	52.7356	60.2226	34.529	57.0448	46.3558	40.4315	52.2801
ENSSSCG00000018049	PRPSAP2; SLC5A10	NO	0.564208	31.3525	18.6369	44.0599	69.0151	45.4634	55.7299	37.954	68.3408	46.3191	39.7074	52.9307
ENSSSCG00000017264	AMZ2	NO	0.861012	24.8946	13.7124	42.9044	76.0435	72.7766	70.8365	23.628	44.7901	46.1983	41.0509	51.3457
ENSSSCG00000003131	SYNGR4	NO	0.737721	29.7688	38.4345	28.8661	45.7975	57.3487	60.8993	44.0443	63.1598	46.0399	40.007	52.0728
ENSSSCG00000003530	TEX46	NO	0.667032	31.7992	26.9536	34.0849	55.7394	60.6899	76.7398	27.9668	51.9532	45.7409	38.6352	52.8465
ENSSSCG00000033592	TMC8	NO	0.623422	38.2477	26.1074	48.7517	85.2178	41.3194	45.5225	27.9148	51.8075	45.6111	39.0584	52.1638
ENSSSCG00000038081	AGPAT3	NO	0.448721	35.6422	27.2811	34.779	70.3217	61.9332	62.7481	23.0753	48.4903	45.5339	38.8574	52.2103
ENSSSCG00000032403	TCP10L2	NO	0.868402	48.2421	30.4336	49.0196	74.3431	40.2647	30.8958	35.6682	55.2531	45.515	43.2986	47.7314
ENSSSCG00000024694	TAF4	NO	0.919909	28.759	31.9996	47.1455	54.2526	63.9759	66.4113	29.4632	38.9927	45.125	42.3359	47.9141
ENSSSCG00000033067	GLT1D1	NO	0.978612	26.7685	14.6001	28.9273	52.6125	94.4097	37.7679	23.1121	82.2986	45.0621	43.3044	46.8198
ENSSSCG00000000190	TUBA1A; TUBA1B	NO	0.380686	54.1603	35.5487	69.8036	46.8321	57.17	40.5035	33.4829	22.1615	44.9578	53.6542	36.2615
ENSSSCG00000012257	MAOA	NO	0.673754	26.6204	22.3905	39.3208	82.5229	49.1643	56.4707	35.5538	46.5344	44.8222	37.6648	51.9796
ENSSSCG00000024750	GFOD2	NO	0.219428	41.0361	28.0283	19.41	55.4541	48.9354	47.7971	30.5922	86.6553	44.7386	34.9934	54.4837
ENSSSCG00000012926	PC	NO	0.266339	25.9666	18.985	44.4145	92.0772	49.8201	55.2188	19.7947	51.3401	44.7021	34.999	54.4053
ENSSSCG00000005979	ANXA13	NO	0.591746	21.8263	15.4126	39.6398	77.1848	52.5763	58.1432	33.9088	57.8302	44.5653	36.9878	52.1427
ENSSSCG00000040260	LOC110259862	NO	0.532957	26.3913	15.7315	38.9788	68.6941	58.7316	76.6917	20.8066	50.4525	44.5598	36.2271	52.8925
ENSSSCG00000009809	MORN3	NO	0.996306	21.4823	11.3929	39.8124	73.2558	63.6129	60.6122	36.6225	49.3279	44.5149	40.3825	48.6472
ENSSSCG00000031489	DUSP22	NO	0.542802	28.0203	23.4137	28.9809	60.0325	59.554	68.1331	29.986	56.8765	44.3746	36.6353	52.114
ENSSSCG00000036832	STK40	NO	0.746851	29.3295	25.1043	43.7161	75.1935	52.846	54.8374	28.7145	44.4758	44.2771	38.6516	49.9027
ENSSSCG00000010980	C9orf24	NO	0.728072	27.8876	16.2949	40.933	69.2898	59.9537	69.9916	21.2757	47.3934	44.1275	37.5125	50.7424
ENSSSCG00000006140	CA2	NO	0.737721	24.1408	15.9339	38.4321	65.0436	67.7842	64.5743	26.0485	50.5071	44.0581	39.1014	49.0147
ENSSSCG00000001655	MEA1	NO	0.595201	49.6409	12.3223	40.8718	70.203	55.949	47.4691	23.9896	50.6963	43.8927	42.6128	45.1726
ENSSSCG00000013737	RNASEH2A	NO	0.953772	38.8159	23.3572	17.5962	125.025	49.7942	37.8195	39.3251	18.0389	43.7215	36.3829	51.0601
ENSSSCG00000017809	GEMIN4	NO	0.730854	27.4504	21.0971	41.6083	73.2859	53.2402	55.473	28.6956	46.931	43.4727	37.7486	49.1967
ENSSSCG00000016977	LOC100519930	NO	0.896841	53.6642	15.1924	33.1172	62.4632	49.3221	59.0067	35.3315	38.3835	43.3101	42.8588	43.7615
ENSSSCG00000008983	CCDC158	NO	0.741698	34.1671	14.6572	48.9478	60.0419	55.052	51.3387	33.3462	47.7452	43.162	42.8783	43.4458
ENSSSCG00000021067	BLVRB	NO	0.972605	32.7932	17.5298	52.4411	81.9428	45.9359	43.5205	24.1767	46.8629	43.1504	38.8367	47.464
ENSSSCG00000038331	IQCN	NO	0.322615	26.5063	18.5253	37.0282	79.6714	55.5052	62.2487	22.5724	42.047	43.0131	35.403	50.6231
ENSSSCG00000006115	RUNX1T1	NO	0.683873	27.4098	20.46	38.4225	72.8413	46.7878	48.3975	36.6022	51.64	42.8201	37.3056	48.3347
ENSSSCG00000014233	LOC100525452	NO	0.818928	28.0721	18.0927	45.2295	75.1705	52.147	56.6061	26.1757	40.8648	42.7948	37.9061	47.6835
ENSSSCG00000021247	HMGB4	NO	0.937258	45.3209	13.7794	49.2688	97.1985	46.7193	46.198	17.3521	26.4259	42.7828	39.6653	45.9004
ENSSSCG00000015607	HHAT	NO	0.400928	31.6644	25.3488	34.9134	69.008	47.0929	63.8867	22.8401	46.4715	42.6532	34.1277	51.1788
ENSSSCG00000004726	LRRC57	NO	0.658149	23.9014	17.8594	37.0091	63.1301	62.4144	64.8354	24.0902	47.5108	42.5939	36.8538	48.3339
ENSSSCG00000038738	DMWD	NO	0.514657	24.8912	40.636	42.5787	65.1391	40.6455	47.1678	36.286	43.3719	42.5895	36.1004	49.0787
ENSSSCG00000013074	RAB3IL1	NO	0.919218	29.1065	20.4163	42.448	50.4261	55.4942	62.7065	28.5455	50.8774	42.5026	38.8986	46.1066
ENSSSCG00000006642	MINDY1	NO	0.427728	20.1281	19.3553	40.5221	83.0991	49.8491	56.2248	24.3857	45.0486	42.3266	33.7212	50.9319
ENSSSCG00000010273	TBATA	NO	0.76965	29.1865	15.9012	38.9397	70.8752	51.8756	58.4747	26.3462	46.9136	42.3141	36.587	48.0412
ENSSSCG00000011952	RPL24	NO	0.0113964	46.8542	21.9609	37.7032	25.4492	62.0356	35.6244	89.2686	19.6052	42.3127	58.9654	25.6599
ENSSSCG00000004592	SLTM	NO	0.718275	49.1022	20.7499	38.6442	61.7529	41.0293	34.9721	30.4613	60.3034	42.1269	39.8092	44.4446
ENSSSCG00000007700	HIP1	NO	0.745278	22.3304	13.4986	29.2704	54.5595	56.2841	64.2492	36.3435	57.7699	41.7882	36.0571	47.5193
ENSSSCG00000049990	SPATA25	NO	0.594263	29.6044	19.4214	32.3715	86.0914	49.9138	47.1827	21.8442	47.5218	41.7439	33.4335	50.0543
ENSSSCG00000014569	RPL27A	NO	0.112613	22.2683	8.37102	89.8378	14.2388	48.7128	86.9436	42.4714	20.3754	41.6524	50.8226	32.4822
ENSSSCG00000011394	RBM6	NO	0.919315	30.0743	10.7333	34.8355	80.434	49.7845	47.5961	32.0312	47.6373	41.6408	36.6814	46.6002
ENSSSCG00000033750	LOC100518097	NO	0.00518483	35.0989	29.5223	27.026	66.3146	32.048	52.4793	23.1667	67.3413	41.6246	29.3349	53.9144
ENSSSCG00000008143	UXS1	NO	0.886248	38.715	16.6634	32.4609	62.6274	36.8529	42.1779	37.9236	65.3831	41.6005	36.4881	46.7129
ENSSSCG00000038305	TMEM185B	NO	0.763307	28.6574	22.6911	45.0115	83.2634	50.1734	47.3957	20.0742	35.181	41.556	35.9791	47.1328
ENSSSCG00000001826	CFAP100	NO	0.726769	31.1109	15.2931	28.0657	76.5649	53.1846	46.8316	25.4217	55.7981	41.5338	34.4457	48.6219
ENSSSCG00000006470	RRNAD1	NO	0.814178	30.9517	0.335513	37.8931	76.0796	59.6588	59.4326	26.8912	41.0254	41.5335	38.8487	44.2183
ENSSSCG00000036621	FAM229B	NO	0.970784	43.1861	21.6701	35.9587	75.694	58.1496	30.8806	22.4449	43.5505	41.4418	39.9348	42.9488
ENSSSCG00000007019	GPAT4	NO	0.933256	21.3841	9.61644	26.2833	40.6036	66.2909	65.9206	31.8658	69.4442	41.4261	36.456	46.3962
ENSSSCG00000045016	THSD8	NO	0.945074	0	0	62.449	12.2565	94.2673	89.911	0	71.8302	41.3393	39.1791	43.4994
ENSSSCG00000022317	SLC38A10	NO	0.0529304	28.8463	26.1577	24.0754	71.1172	44.1244	46.1121	21.9982	66.8565	41.161	29.7611	52.5609
ENSSSCG00000012995	DPF2	NO	0.504599	21.0096	19.3147	30.1703	66.141	72.8101	65.8268	18.0014	35.9831	41.1571	35.4979	46.8164
ENSSSCG00000028976	PPP2R2B	NO	0.633966	17.15	9.86593	24.7867	91.4264	67.899	43.8567	18.1522	55.2412	41.0473	31.997	50.0976
ENSSSCG00000000364	SARNP	NO	0.781592	51.0104	5.81604	9.86231	85.1225	63.2808	59.0449	49.4185	4.47872	41.0043	43.393	38.6155
ENSSSCG00000003350	MIB2	NO	0.972458	33.4942	26.3303	45.3332	44.5184	57.1049	61.3437	22.2433	37.3403	40.9635	39.5439	42.3832
ENSSSCG00000011114	SEC61A2	NO	0.95087	31.1697	2.40491	13.9747	88.6653	70.0645	65.5035	12.8833	42.9159	40.9477	32.0231	49.8724
ENSSSCG00000013003	ZNHIT2	NO	0.887439	46.5977	66.6279	11.5325	20.9774	66.3682	62.0553	28.2832	24.8751	40.9147	38.1954	43.6339
ENSSSCG00000003090	NECTIN2	NO	0.295877	29.809	26.5876	45.2057	94.1178	36.1004	35.7019	17.5016	41.5428	40.8208	32.1542	49.4875
ENSSSCG00000015596	FAM71A	NO	0.461847	30.1176	19.349	31.4645	62.1012	56.6814	66.9404	17.8961	41.5598	40.7638	34.0399	47.4876
ENSSSCG00000025470	TSSK4	NO	0.789648	21.866	22.2899	39.4075	52.2292	59.175	57.3311	25.0404	48.2624	40.7002	36.3722	45.0282
ENSSSCG00000009972	KREMEN1	NO	0.556766	19.7067	16.2432	40.3222	71.8091	49.7772	54.9733	25.7514	46.7386	40.6652	33.8894	47.441
ENSSSCG00000013005	VPS51	NO	0.699667	26.6735	26.8693	31.1268	54.8998	54.9949	59.5574	30.0057	40.812	40.6174	35.7002	45.5346
ENSSSCG00000032265	TLE5	NO	0.604646	26.6755	11.8401	39.2677	53.333	57.9609	52.805	41.6989	40.3909	40.4965	41.4007	39.5922
ENSSSCG00000033833	DUSP18	NO	0.590678	25.47	28.3664	42.1847	80.0382	51.7514	44.0494	17.1791	34.5905	40.4537	34.1463	46.7611
ENSSSCG00000010929	CYB5R1	NO	0.984282	24.8073	35.0264	38.3201	70.4689	58.6279	40.6109	30.8564	24.2862	40.3755	38.1529	42.5981
ENSSSCG00000026323	FAM50B	NO	0.852733	32.8906	55.5022	22.5376	39.0018	44.0998	42.6371	44.5203	41.3615	40.3189	36.0121	44.6256
ENSSSCG00000014559	PSMD13	NO	0.964299	35.5145	18.7689	31.64	67.2752	52.129	43.8751	28.4098	43.6077	40.1525	36.9233	43.3817
ENSSSCG00000040486	BIRC5	NO	0.930088	34.7125	18.2373	26.9694	43.883	69.7702	57.8836	21.3895	48.3469	40.149	38.2104	42.0877
ENSSSCG00000015871	NR4A2	NO	0.847737	24.7292	25.0333	31.3633	48.2075	53.4977	57.7985	37.8232	42.7372	40.1487	36.8533	43.4441
ENSSSCG00000033744		NO	0.521742	57.524	12.419	23.8458	35.5621	49.364	47.4328	52.0815	42.5646	40.0992	45.7039	34.4946
ENSSSCG00000015826	PLPBP	NO	0.919909	24.6397	14.01	33.4063	63.6719	55.0419	57.006	31.0818	41.9242	40.0977	36.0424	44.153
ENSSSCG00000029179	HIGD2A	NO	0.779883	25.481	23.2577	43.8501	83.2952	51.7542	41.3492	16.5585	34.5923	40.0173	34.411	45.6236
ENSSSCG00000016317	AGAP1	NO	0.534719	57.7858	22.9898	27.7439	60.9883	38.8004	35.8329	21.8428	53.9942	39.9973	36.5432	43.4513
ENSSSCG00000004718	TTBK2	NO	0.63148	40.0147	22.0386	43.3592	35.7768	52.7339	66.1933	16.5684	43.1377	39.9778	38.169	41.7866
ENSSSCG00000017043	RNF145	NO	0.680836	24.9239	27.5547	26.5507	68.8266	43.7463	36.8548	37.4072	49.4143	39.4098	33.157	45.6626
ENSSSCG00000029447	IQCF5	NO	0.724292	41.0628	24.7202	40.7901	75.1841	33.3642	37.2839	17.7063	44.0906	39.2753	33.2308	45.3197
ENSSSCG00000014440	HMGXB3	NO	0.142217	35.4311	22.9422	23.8867	58.7895	46.3682	53.0418	20.7476	52.6127	39.2275	31.6084	46.8466
ENSSSCG00000029830	RPL8	NO	0.262784	31.812	10.547	20.7353	38.784	61.9233	38.2827	76.5489	35.0294	39.2078	47.7549	30.6608
ENSSSCG00000030153	SMURF1	NO	0.634318	32.0499	25.3771	34.2929	57.7691	49.7939	51.0673	21.1775	41.654	39.1477	34.3285	43.9669
ENSSSCG00000017430	EIF1	NO	0.316114	37.969	13.9818	30.5292	48.0942	57.9502	39.9826	41.6573	42.2753	39.0549	42.0264	36.0835
ENSSSCG00000004480	COX7A2	NO	0.99841	42.8307	17.3655	23.8544	50.8725	60.3599	49.0217	24.0924	41.5673	38.7455	37.7843	39.7068
ENSSSCG00000023866	ACSF3	NO	0.886312	23.803	18.6476	25.8247	44.9424	69.8246	41.0426	28.8199	55.6277	38.5666	37.068	40.0651
ENSSSCG00000000908	UBE2N	NO	0.894744	26.7934	15.2948	20.8777	55.7758	56.7361	59.2884	31.3028	41.2735	38.4178	33.9275	42.9081
ENSSSCG00000051614		NO	0.667473	0.199185	0	258.53	48.1769	0	0	0.265264	0	38.3964	64.7485	12.0442
ENSSSCG00000031557	CHCHD6	NO	0.6113	14.6635	11.9756	18.7665	30.4847	64.9273	22.8068	11.0522	132.444	38.3901	27.3524	49.4279
ENSSSCG00000029827	IQCF1	NO	0.333443	44.1328	23.1664	30.0228	86.8172	31.176	44.3266	11.4502	35.2557	38.2934	29.1954	47.3915
ENSSSCG00000011085	MLLT10	NO	0.557365	34.3451	26.1278	30.107	60.3728	39.8663	38.2109	26.2519	50.7141	38.2495	32.6426	43.8564
ENSSSCG00000015807	ADAM32	NO	0.978667	37.631	11.2517	31.1863	60.1619	41.7195	43.111	27.0917	50.6225	37.847	34.4071	41.2868
ENSSSCG00000027076	CYHR1	NO	0.410044	8.7566	23.6433	10.4572	80.2511	56.7512	56.9638	24.1533	41.1021	37.7598	25.0296	50.4901
ENSSSCG00000029212	GDE1	NO	0.585948	27.6743	15.1551	17.0344	45.1317	61.3805	65.5896	26.99	42.7405	37.712	33.2698	42.1542
ENSSSCG00000026293	STX5	NO	0.294188	0	6.75154	48.5492	79.035	56.7973	56.228	0.284297	53.227	37.609	26.4077	48.8104
ENSSSCG00000029474	AVEN	NO	0.973795	24.1522	14.3706	24.2545	42.0722	63.6894	56.3818	30.0282	45.3784	37.5409	35.5311	39.5507
ENSSSCG00000010139	CCDC188	NO	0.842787	33.5261	24.9276	30.3829	61.2988	38.8337	34.1293	31.0392	44.9796	37.3897	33.4455	41.3338
ENSSSCG00000038579	DKKL1	NO	0.730538	27.7562	13.4635	23.6853	47.8836	48.423	50.8677	24.2408	62.6123	37.3666	31.0263	43.7068
ENSSSCG00000044339		NO	0.795776	0.069495	0.084156	264.206	33.5791	0.161435	0.14026	0	0	37.2801	66.1093	8.45088
ENSSSCG00000017415	TTC25	NO	0.15336	28.6011	17.9207	22.3594	71.0782	31.991	36.5948	27.8227	60.9547	37.1653	27.6936	46.6371
ENSSSCG00000015627	ZPBP	NO	0.99841	40.2916	15.4807	38.5119	59.9431	27.4882	30.6554	29.951	54.3029	37.0781	34.0607	40.0955
ENSSSCG00000012905	TMEM134	NO	0.706816	26.818	39.0977	12.7081	26.9446	52.2867	44.5641	39.9489	54.1546	37.0653	32.9404	41.1903
ENSSSCG00000025417	BBS2	NO	0.616402	27.0414	14.6767	27.8877	56.4878	41.566	48.2756	27.1834	53.1628	37.0352	30.9196	43.1507
ENSSSCG00000016220	DNPEP	NO	0.907311	25.3018	9.15114	18.1009	43.7939	64.2487	68.2235	23.547	41.8788	36.7807	32.7996	40.7618
ENSSSCG00000007313	CNBD2	NO	0.266752	25.0556	18.5729	26.7682	71.4477	42.0076	47.7784	20.9553	40.2198	36.6007	28.6967	44.5047
ENSSSCG00000016772	VPS41	NO	0.597826	31.7644	13.8878	18.3059	51.4646	37.2967	40.7225	32.2246	67.0115	36.5847	29.8979	43.2716
ENSSSCG00000001930	PKM	NO	0.558386	21.7925	11.2904	23.7604	67.1752	46.3091	41.8257	21.2384	58.7952	36.5234	28.2751	44.7716
ENSSSCG00000034272	DENND6B	NO	0.566644	18.9757	12.1326	33.6609	67.6288	53.1635	51.5215	15.7783	39.1951	36.5071	30.3946	42.6195
ENSSSCG00000005934	TRAPPC9	NO	0.203029	24.768	24.9738	26.5253	62.5359	45.361	49.5173	18.9887	38.9532	36.4529	28.9108	43.995
ENSSSCG00000003596	SNRNP40	NO	0.508058	16.8652	9.77331	27.7331	72.4592	35.9266	36.3659	30.5707	61.9168	36.4513	27.7739	45.1288
ENSSSCG00000013176	TMX2	NO	0.714548	17.9254	9.86893	32.0201	69.0644	50.4485	44.8747	18.8377	48.3749	36.4268	29.8079	43.0457
ENSSSCG00000031593	NUDT3; RPS10	NO	0.0417146	34.4988	9.59007	24.6863	41.3246	62.9712	36.7695	51.9592	29.5497	36.4187	43.5289	29.3085
ENSSSCG00000002355	ENTPD5	NO	0.77724	20.7261	18.3311	27.2798	71.8834	47.9148	44.002	22.7206	37.5579	36.302	29.6603	42.9436
ENSSSCG00000037669	PTPN7	NO	0.526358	15.1852	13.3841	24.5082	48.0164	24.6788	23.6554	33.8658	106.649	36.2428	24.5595	47.9262
ENSSSCG00000023031	TNNT2	NO	0.761953	40.3366	20.9959	44.3005	43.6679	56.0753	40.9332	16.6202	27.0046	36.2418	39.3332	33.1504
ENSSSCG00000027457	FBXO22	NO	0.930576	33.1796	27.0414	32.374	45.3524	32.1316	44.9874	46.784	27.7775	36.2035	36.1173	36.2897
ENSSSCG00000039640	CDC34	NO	0.737721	20.9448	15.3329	25.6597	42.1393	61.6468	69.4003	19.3245	34.9103	36.1698	31.894	40.4457
ENSSSCG00000030707	INPP5K	NO	0.998618	34.444	11.5675	42.5271	43.2393	58.7963	38.4792	7.28951	52.6183	36.1201	35.7642	36.4761
ENSSSCG00000022545	CALM3	NO	0.978277	43.8086	21.0474	10.1642	55.8035	44.3958	47.6666	20.9238	44.9103	36.09	29.8231	42.3569
ENSSSCG00000025343	ZNF628	NO	0.868402	26.7204	29.7942	32.4052	39.5812	38.8052	45.9567	32.6443	42.1109	36.0023	32.6438	39.3608
ENSSSCG00000015734	IMP4	NO	0.611027	24.9222	15.1127	26.2614	54.7115	51.4207	51.1868	20.2485	42.7757	35.8299	30.7132	40.9467
ENSSSCG00000021910	GAST	NO	0.678584	17.4403	10.812	32.7239	72.2314	41.6232	48.2829	18.1333	45.2966	35.8179	27.4802	44.1557
ENSSSCG00000010774	ZNF511	NO	0.504944	22.2914	16.0708	23.8023	63.9779	49.7884	49.7322	18.0648	41.5315	35.6574	28.4867	42.8281
ENSSSCG00000036801	C6orf132	NO	0.777662	11.9157	9.18794	40.6547	61.9265	54.6487	59.5761	16.8497	29.0241	35.4729	31.0172	39.9287
ENSSSCG00000033286		NO	0.835974	25.6283	26.5407	30.7324	39.4129	52.036	50.5617	21.5193	36.1063	35.3172	32.479	38.1554
ENSSSCG00000034818	ING1	NO	0.978876	28.0223	9.2649	34.7102	48.6167	44.1549	42.1948	26.3249	49.179	35.3085	33.303	37.3139
ENSSSCG00000037519	PRSS51	NO	0.717841	17.4878	21.7799	32.4162	72.1074	45.0125	34.1373	22.1191	37.0571	35.2647	29.2589	41.2704
ENSSSCG00000036472	HIC2	NO	0.473759	20.9162	19.5067	37.7583	72.0026	40.1419	38.9685	14.8842	37.6603	35.2298	28.4252	42.0345
ENSSSCG00000011362	TMEM89	NO	0.231765	21.2946	21.4194	19.2305	68.2481	50.1027	54.2888	13.132	33.5493	35.1582	25.9399	44.3764
ENSSSCG00000042755	LOC110261716	NO	0.809507	24.4621	14.5337	33.5693	76.3588	36.6695	31.4178	19.2497	44.4725	35.0917	28.4876	41.6957
ENSSSCG00000037580	ITPRIPL1	NO	0.93458	42.5748	12.7886	3.34343	90.2681	48.1947	49.4869	29.1107	3.49484	34.9078	30.8059	39.0096
ENSSSCG00000014035	B4GALT7	NO	0.683956	19.9422	12.8495	35.7785	70.4685	47.3177	43.8366	16.1776	32.6134	34.873	29.804	39.942
ENSSSCG00000016115	ICA1L	NO	0.819895	31.0661	14.4229	29.5857	55.9232	35.4506	48.582	23.9251	37.745	34.5876	30.0069	39.1683
ENSSSCG00000024189	SIL1	NO	0.596315	20.8916	19.5034	37.3565	68.5081	30.8383	28.7067	24.6014	46.2389	34.5806	28.4219	40.7393
ENSSSCG00000029513	TEX28	NO	0.77013	24.4249	20.3724	32.2467	44.2973	42.1417	46.975	22.0252	43.9497	34.5541	30.2096	38.8986
ENSSSCG00000028920	POLDIP2	NO	0.75282	22.6099	19.0738	29.5164	50.4459	42.5981	43.5005	26.6601	41.8922	34.5371	30.3461	38.7281
ENSSSCG00000034445	LOC100622642	NO	0.761953	27.384	15.769	18.9986	47.457	62.0374	59.5255	15.2472	29.242	34.4576	30.9168	37.9984
ENSSSCG00000006538	FLAD1	NO	0.47298	15.4598	13.6171	25.826	53.8403	47.1537	54.0577	23.838	41.3496	34.3928	28.0694	40.7162
ENSSSCG00000032197	GNG3	NO	0.97469	30.1255	12.3726	52.1345	88.322	13.5706	14.9375	25.6797	37.9144	34.3821	30.3776	38.3866
ENSSSCG00000026034	NUP153	NO	0.977357	28.8934	11.2367	30.9957	54.2873	41.5232	44.634	25.1391	38.2219	34.3664	31.6379	37.095
ENSSSCG00000007935	C3H16orf71	NO	0.17742	25.3352	14.2453	15.0239	58.6959	36.7687	57.7769	23.2584	43.3231	34.3034	25.0966	43.5103
ENSSSCG00000017707	TAF15	NO	0.92489	22.2512	11.0234	23.3775	45.0148	51.9793	52.9676	26.6817	41.0383	34.2917	31.0724	37.511
ENSSSCG00000028712	ATPAF2	NO	0.41536	15.8964	14.4804	27.6082	47.7825	44.1547	51.5833	18.6935	54.1265	34.2907	26.5882	41.9932
ENSSSCG00000013579	CD209	NO	0.85734	22.1986	6.57093	38.229	63.4934	52.1649	42.3654	16.5194	30.1721	33.9642	32.278	35.6504
ENSSSCG00000044285		NO	0.895954	17.95	75.9367	33.5957	20.08	32.7705	25.7923	45.377	19.2176	33.84	32.4233	35.2567
ENSSSCG00000038397	PTK2	NO	0.77013	31.99	14.2946	19.4284	52.3676	39.9826	37.2634	24.1657	50.9491	33.8052	28.8917	38.7187
ENSSSCG00000005585	DENND1A	NO	0.992201	29.0451	14.8952	28.7408	47.6453	38.0937	34.7844	29.0652	47.9979	33.7834	31.2362	36.3307
ENSSSCG00000005678	NTMT1	NO	0.868597	33.896	13.3954	38.8793	45.6499	39.7525	37.3528	20.6418	39.8951	33.6829	33.2924	34.0733
ENSSSCG00000006303	DCAF6	NO	0.531174	25.0643	14.5011	27.9583	61.4367	34.6359	43.8153	21.7728	38.5866	33.4714	27.3578	39.5849
ENSSSCG00000015850	DUSP4	NO	0.680775	20.4168	21.3905	26.3737	39.2203	43.1589	49.0674	25.4208	42.4148	33.4329	28.8425	38.0233
ENSSSCG00000001880	SIN3A	NO	0.949713	32.1231	4.76545	15.2988	63.6587	53.2165	37.6336	13.0606	47.5627	33.4149	28.4247	38.4051
ENSSSCG00000003730	RNF138	NO	0.883507	21.9666	21.8131	25.8462	40.5062	39.462	44.1029	30.1234	43.3613	33.3977	29.3496	37.4459
ENSSSCG00000033548	LKAAEAR1	NO	0.942786	22.231	24.4181	43.7034	39.6844	38.5467	38.7364	31.0769	28.7795	33.3971	33.8895	32.9046
ENSSSCG00000007995	MCRIP2	NO	0.77013	26.9177	28.4345	21.9999	44.2636	47.8903	40.503	20.9763	36.1123	33.3872	29.4461	37.3283
ENSSSCG00000029612	PRSS37	NO	0.843191	25.3287	8.2372	30.7667	58.706	48.1989	47.0489	16.0456	32.6907	33.3778	30.085	36.6707
ENSSSCG00000020678	BANP	NO	0.42736	25.1897	17.0345	25.3949	52.1637	45.8653	49.1708	15.5839	36.1525	33.3194	28.0085	38.6304
ENSSSCG00000017290	STRADA	NO	0.534719	27.4039	14.7953	37.5176	52.8347	47.9552	45.5313	9.14134	31.0865	33.2832	30.5045	36.062
ENSSSCG00000009652	KCTD9	NO	0.953772	30.9692	10.4531	29.1651	55.3434	28.2871	28.557	25.5296	57.5182	33.2278	28.4877	37.9679
ENSSSCG00000010175	GNPAT	NO	0.746351	20.0892	17.0204	32.9881	57.1988	39.769	42.8491	22.3525	33.5116	33.2223	28.7997	37.645
ENSSSCG00000021170	FAR1	NO	0.425534	35.4151	15.9324	37.3951	30.6544	44.6484	33.4938	33.353	34.8692	33.2202	37.7029	28.7374
ENSSSCG00000024235	NPLOC4	NO	0.249507	14.8874	10.3943	12.8727	30.7049	24.9691	28.5689	35.8897	107.418	33.2131	22.1547	44.2716
ENSSSCG00000005938	COL22A1	NO	0.924082	18.4691	12.5743	25.4829	38.4135	37.2629	33.7992	37.5285	62.0333	33.1955	29.6859	36.7051
ENSSSCG00000008675	LETM1	NO	0.993051	26.0742	20.6994	33.3714	42.3987	48.2365	38.2528	22.2085	33.6817	33.1154	32.4726	33.7582
ENSSSCG00000033169	RPS15	NO	0.000463412	30.6471	4.09121	24.5697	18.5844	64.0568	36.0704	62.5131	24.2194	33.094	45.4467	20.7414
ENSSSCG00000010089	LOC100153093	NO	0.460129	15.6898	13.7125	29.2292	57.4218	40.8294	41.6447	22.2768	43.5955	33.05	27.0063	39.0936
ENSSSCG00000046182		NO	0.946456	20.1812	8.67144	27.0793	48.2614	58.4395	57.4902	19.2818	24.425	32.9787	31.2454	34.712
ENSSSCG00000017259	PRKAR1A	NO	0.980001	30.262	13.3005	30.5911	29.6034	49.6462	48.5527	23.6996	38.1673	32.9778	33.5497	32.406
ENSSSCG00000008690	RNF4	NO	0.819895	30.1368	25.0301	33.5366	43.5331	41.6767	41.5058	27.6734	20.3613	32.9317	33.2559	32.6076
ENSSSCG00000026433	CCDC73	NO	0.926547	44.0324	14.3717	31.8649	52.2854	20.5356	43.9768	23.4172	32.8832	32.9209	29.9625	35.8793
ENSSSCG00000008238	ELMOD3	NO	0.333443	17.6985	13.6232	27.4215	56.1231	43.4102	48.7954	16.4183	38.8662	32.7945	26.2371	39.352
ENSSSCG00000002505	PAPOLA	NO	0.978561	27.0079	9.6704	21.9735	48.351	38.222	40.6844	30.2463	46.1519	32.7884	29.3624	36.2144
ENSSSCG00000007803	TUFM	NO	0.760702	18.7814	16.6177	25.4756	42.4541	53.5609	50.9431	19.5008	34.1556	32.6862	29.3297	36.0426
ENSSSCG00000017155	EIF4A3	NO	0.938446	22.7454	11.0278	25.6618	48.4789	34.9648	31.0921	38.4731	48.8944	32.6673	30.4613	34.8733
ENSSSCG00000007705	POM121C	NO	0.483765	22.5753	14.9512	31.7028	61.112	32.0961	36.1425	21.1148	41.6143	32.6636	26.8723	38.455
ENSSSCG00000004236	PKIB	NO	0.99841	17.6613	8.34399	35.0931	54.4162	46.7961	49.3874	17.7719	30.2924	32.4703	29.3306	35.61
ENSSSCG00000029362	CHMP2A	NO	0.983206	34.5085	17.2656	21.0763	39.7671	32.517	36.5857	37.0563	40.5307	32.4134	31.2895	33.5373
ENSSSCG00000030228	PIWIL2	NO	0.605593	24.2239	13.9729	26.6175	52.2108	35.8663	37.2064	21.2509	47.6003	32.3686	26.9897	37.7476
ENSSSCG00000002483	LOC106504545	NO	0.43639	6.25015	5.95162	31.3637	69.9765	28.8091	29.5785	28.0666	58.6717	32.3335	23.6224	41.0446
ENSSSCG00000028282	SLC1A4	NO	0.965654	19.4522	14.6293	35.3352	36.3865	51.328	37.1647	22.5942	41.4162	32.2883	32.1774	32.3992
ENSSSCG00000003512	EIF4G3	NO	0.979301	20.671	10.6781	31.2553	47.3352	42.8139	45.555	23.2063	36.6918	32.2758	29.4866	35.065
ENSSSCG00000003217	ASPDH; JOSD2	NO	0.589592	34.3599	30.6186	25.1362	40.7092	31.7519	37.775	16.2442	40.8633	32.1823	26.8731	37.4915
ENSSSCG00000013054	ATL3	NO	0.397814	15.3481	10.0311	26.5494	53.6046	46.0904	51.2218	16.7802	37.3279	32.1192	26.192	38.0463
ENSSSCG00000009684	PRSS55	NO	0.818928	28.5386	15.4033	33.5722	57.2206	24.7894	34.5766	23.9281	38.8928	32.1152	27.7071	36.5233
ENSSSCG00000002410	CEP128	NO	0.831373	32.8989	14.6504	23.3714	49.3796	27.425	30.9983	29.0394	48.9966	32.095	28.1837	36.0062
ENSSSCG00000027874	LOC102167734	NO	0.577661	20.9166	16.3031	34.1877	57.2774	40.0943	50.8984	11.8456	25.2254	32.0936	26.761	37.4261
ENSSSCG00000000199	SPATS2	NO	0.728202	17.3908	13.7747	28.9846	52.1435	36.4902	41.4319	26.6057	39.8883	32.0887	27.3678	36.8096
ENSSSCG00000044105		NO	0.700885	20.63	13.7589	36.1196	67.9254	37.8801	37.5121	13.2769	29.424	32.0659	26.9767	37.1551
ENSSSCG00000000955	TBC1D22A	NO	0.502488	17.2972	14.5443	38.6859	62.1134	33.3134	41.5419	15.3561	33.665	32.0647	26.1632	37.9662
ENSSSCG00000004927	CLPX	NO	0.726336	23.9282	11.5583	38.2037	45.3105	40.7192	38.8124	25.9792	31.6891	32.0251	32.2076	31.8425
ENSSSCG00000015690	UBXN4	NO	0.000831868	37.7353	5.22099	64.3274	27.3704	51.7337	25.9612	24.6691	19.0468	32.0081	44.6164	19.3998
ENSSSCG00000005961	LOC102165484	NO	0.54756	13.2048	22.8538	25.7801	56.5472	47.8068	37.1191	17.4153	35.3212	32.006	26.0517	37.9603
ENSSSCG00000036272		NO	0.993005	10.5156	13.2058	41.5859	30.7259	58.7253	48.0706	18.6332	34.1395	31.9502	32.365	31.5354
ENSSSCG00000015276	ETNK2	NO	0.470197	18.0325	14.0605	26.2765	62.0608	42.3155	39.6999	17.2224	35.8119	31.935	25.9617	37.9083
ENSSSCG00000004276	SMAP1	NO	0.85734	17.1979	8.51185	20.8901	44.1529	49.951	48.7347	23.8829	41.607	31.8661	27.9805	35.7516
ENSSSCG00000010719	LOC100620521	NO	0.92548	31.0295	12.0586	21.3565	44.1437	40.3347	39.1545	22.3416	44.2617	31.8351	28.7656	34.9046
ENSSSCG00000014394	RNF14	NO	0.9265	21.6116	12.548	30.2634	39.6991	53.9255	46.6857	20.2347	29.3382	31.7883	31.5088	32.0678
ENSSSCG00000036275	NSMCE1	NO	0.786696	12.7882	6.99906	23.0622	43.5302	31.3926	25.085	16.8942	94.3079	31.7574	21.0343	42.4805
ENSSSCG00000004859	ZNF516	NO	0.533773	14.1937	12.7282	28.8182	51.5327	44.2745	50.3837	18.7756	32.6123	31.6648	26.5155	36.8142
ENSSSCG00000017142	BAIAP2	NO	0.0804006	24.8294	13.4534	24.8894	61.8266	36.0924	53.3107	11.9493	26.2317	31.5729	24.4401	38.7056
ENSSSCG00000034227	RPL35	NO	0.140256	12.3926	4.85201	30.1424	39.9868	49.5937	45.4555	41.4597	28.4763	31.5449	33.3971	29.6926
ENSSSCG00000044715		NO	0.877877	53.3416	101.738	14.3081	18.6273	24.1424	12.7487	9.31753	17.0615	31.4107	25.2774	37.5439
ENSSSCG00000039249	PPP1R2	NO	0.95087	9.4467	48.1214	55.1987	16.9831	14.0964	14.984	13.7856	78.6536	31.4087	23.1318	39.6855
ENSSSCG00000009709	MFAP3L	NO	0.71285	23.643	9.94335	30.373	50.88	33.8776	52.5968	19.7993	29.2262	31.2924	26.9232	35.6616
ENSSSCG00000051187	FAM71E2	NO	0.161651	23.1223	15.1878	25.8547	64.5242	35.7721	42.705	10.8982	32.194	31.2823	23.9118	38.6527
ENSSSCG00000003870	NRDC	NO	0.739301	28.5011	8.0951	22.8124	44.5429	55.6214	31.0931	21.5592	37.9115	31.2671	32.1235	30.4107
ENSSSCG00000045819		NO	0.94507	0	0.401364	222.479	26.6325	0	0.059373	0	0	31.1965	55.6198	6.7733
ENSSSCG00000005928	MROH5	NO	0.260346	14.9314	15.5553	30.1092	58.5184	39.3725	42.4376	13.5453	34.4677	31.1172	24.4896	37.7448
ENSSSCG00000034615	TNFAIP8L1	NO	0.822194	15.5588	16.0543	31.1147	45.3761	44.2902	43.7991	21.0723	31.5373	31.1004	28.009	34.1917
ENSSSCG00000007097	SEC23B	NO	0.759914	26.2409	16.5274	22.8587	50.9743	31.1806	33.2979	28.2638	39.3044	31.081	27.136	35.026
ENSSSCG00000009077	PLK4	NO	0.794911	29.0828	20.1314	31.4761	40.1791	35.3834	34.5157	26.9779	30.8497	31.0745	30.73	31.419
ENSSSCG00000000886	SLC25A3	NO	0.763307	15.3273	7.37773	17.8712	50.8302	44.5068	46.598	29.0629	36.8201	31.0493	26.692	35.4065
ENSSSCG00000003679	PPP4R1	NO	0.737721	15.2946	16.7079	27.4908	51.8169	34.676	28.3893	26.8288	46.5563	30.9701	26.0725	35.8676
ENSSSCG00000017940	GPS2	NO	0.105015	12.8264	4.32365	63.3258	41.2836	41.3605	30.4412	28.7393	24.5578	30.8573	36.563	25.1516
ENSSSCG00000008583	ITSN2	NO	0.00114814	22.5969	5.57273	47.3599	32.8759	46.6491	33.0624	32.648	23.766	30.5664	37.3135	23.8193
ENSSSCG00000034153	TAF6	NO	0.627011	17.1029	10.7747	21.8636	52.3042	51.8397	51.1753	13.423	25.4012	30.4856	26.0573	34.9138
ENSSSCG00000016248	AGFG1	NO	0.855983	16.6323	11.0295	25.1344	46.3001	43.2731	37.4766	23.8657	39.723	30.4293	27.2264	33.6323
ENSSSCG00000006219	MTFR1	NO	0.995409	31.7668	14.9043	24.0332	41.2737	32.1064	27.0065	26.8378	45.4469	30.422	28.6861	32.1579
ENSSSCG00000035677	EPOP	NO	0.970715	25.9274	36.3745	37.232	45.7366	26.6085	24.6992	23.5465	23.1334	30.4073	28.3286	32.4859
ENSSSCG00000010128	SEPTIN5	NO	0.327507	18.7734	12.1153	25.6151	57.9866	42.4012	50.0968	12.2876	23.8308	30.3884	24.7693	36.0074
ENSSSCG00000003935		NO	0.737721	35.8708	20.7575	12.625	31.7993	34.3999	40.1128	23.5262	43.6832	30.3468	26.6055	34.0882
ENSSSCG00000000965	NCAPH2	NO	0.643906	23.5813	16.2834	30.6552	62.9932	33.7379	29.6157	13.9895	31.3315	30.2735	25.491	35.056
ENSSSCG00000009732	CHFR	NO	0.677948	23.2205	12.8211	23.8365	46.5752	40.83	40.331	15.9085	38.1772	30.2125	25.9489	34.4761
ENSSSCG00000035612	COX6B2	NO	0.970043	23.2263	13.6545	26.5603	49.812	38.8682	45.8581	24.8892	18.8025	30.2089	28.386	32.0318
ENSSSCG00000032947	SRRM1	NO	0.9265	20.9906	11.5342	29.5412	45.4065	39.0376	36.5861	28.4747	29.8151	30.1732	29.511	30.8355
ENSSSCG00000024373	TRIP12	NO	0.983993	19.103	10.1614	25.5167	45.1931	45.8928	37.4082	22.1598	35.7118	30.1433	28.1681	32.1186
ENSSSCG00000017546	ZNF652	NO	0.94507	26.8824	18.0886	33.4094	37.7295	32.5691	36.963	25.457	29.4038	30.0629	29.5795	30.5462
ENSSSCG00000044259		NO	0.696947	23.7766	17.8554	21.1174	41.2374	38.7609	41.6968	14.8528	40.0489	29.9183	24.6269	35.2096
ENSSSCG00000012981	RELA	NO	0.861353	23.684	20.8981	24.2488	43.2217	36.0997	34.2733	19.4558	37.4601	29.9177	25.8721	33.9633
ENSSSCG00000040538	WDFY2	NO	0.14754	11.3501	7.01939	29.2217	28.9444	47.2854	57.9109	6.26104	49.9605	29.7442	23.5296	35.9588
ENSSSCG00000037536	SLC25A28	NO	0.853347	16.3951	9.71774	21.7776	41.3249	54.486	44.6123	15.6851	33.6018	29.7001	27.0859	32.3142
ENSSSCG00000011615	RAB7A	NO	0.552139	15.3869	13.64	20.7913	42.806	40.9784	41.8752	22.4198	39.3568	29.6568	24.8941	34.4195
ENSSSCG00000018086	ND4L	NO	0.974091	6.56994	5.14002	0.611781	46.7865	0.051849	149.81	7.70478	20.0078	29.5853	3.73459	55.436
ENSSSCG00000017364	HROB	NO	0.307979	23.0229	13.2461	25.8395	55.4335	35.6137	42.9776	12.456	27.9256	29.5644	24.233	34.8957
ENSSSCG00000002007	FITM1	NO	0.703685	22.5117	39.7936	25.0571	33.2334	32.4456	37.9712	17.7483	27.0011	29.4703	24.4407	34.4998
ENSSSCG00000045919		NO	0.95269	43.2889	22.9918	22.4009	29.2957	24.8704	24.9179	21.1052	46.7464	29.4521	27.9164	30.9879
ENSSSCG00000003136	CYTH2	NO	0.925133	11.6604	4.61268	16.6012	27.3819	66.4714	54.2677	17.7636	36.7514	29.4388	28.1242	30.7534
ENSSSCG00000028777	MYLK4	NO	0.988629	37.8196	41.2157	10.2336	21.5006	27.795	20.3407	36.854	38.7772	29.317	28.1755	30.4585
ENSSSCG00000022778	SGF29	NO	0.787296	13.4584	5.931	34.4426	80.1806	29.2533	28.0233	14.4729	27.9329	29.2119	22.9068	35.5169
ENSSSCG00000023759	WDR13	NO	0.557087	21.4013	16.205	27.8848	46.4777	35.4799	40.8254	12.88	32.0851	29.1549	24.4115	33.8983
ENSSSCG00000016426	ACTR3B	NO	0.83424	24.842	5.11499	15.3434	45.9397	13.8643	38.3431	30.5592	58.7575	29.0955	21.1522	37.0388
ENSSSCG00000001486	LRRC1	NO	0.891638	23.9038	11.4338	29.9507	47.9019	33.9704	32.076	22.6871	30.2175	29.0176	27.628	30.4073
ENSSSCG00000011645	CEP63	NO	0.83861	35.2399	11.8503	23.7263	41.7808	30.9852	38.0522	23.9538	26.5392	29.016	28.4763	29.5556
ENSSSCG00000011447	SPCS1	NO	0.970161	18.5956	9.68467	24.7884	46.4477	41.6224	36.1834	20.4642	33.9071	28.9617	26.3676	31.5557
ENSSSCG00000034876	PET100	NO	0.83424	38.1808	19.9016	23.8382	43.9407	28.6015	37.0109	11.947	28.2154	28.9545	25.6419	32.2671
ENSSSCG00000023974	PHF21A	NO	0.946929	16.6261	7.11951	25.4775	47.8203	30.2201	32.8547	27.9366	42.9403	28.8744	25.0651	32.6837
ENSSSCG00000026004	MSRB3	NO	0.932012	22.2843	9.49816	16.4283	37.4351	30.7397	30.1166	40.4221	43.8477	28.8465	27.4686	30.2244
ENSSSCG00000039619	PIN1	NO	0.88972	19.9187	6.21417	25.7872	45.3677	33.4189	38.7166	15.501	45.3572	28.7852	23.6565	33.9139
ENSSSCG00000028696	FEN1	NO	0.985415	28.5201	17.9741	19.5993	29.3507	44.3531	48.2992	18.6533	23.2739	28.753	27.7814	29.7245
ENSSSCG00000034728	RNF151	NO	0.905564	19.2251	7.80835	23.3348	55.5923	54.9765	35.6942	14.6553	18.3562	28.7053	28.0479	29.3628
ENSSSCG00000011373	QRICH1	NO	0.342856	18.212	10.8872	12.7781	56.6375	35.2017	41.9408	19.6486	34.1462	28.6815	21.4601	35.9029
ENSSSCG00000030262	GDPD1	NO	0.881709	24.664	11.0312	35.2001	74.9695	22.6338	22.6439	13.8208	24.1795	28.6429	24.0797	33.206
ENSSSCG00000001532	UHRF1BP1	NO	0.818928	16.0314	10.1283	23.5209	44.5749	43.3129	41.0837	19.0147	30.8488	28.5645	25.47	31.6589
ENSSSCG00000022177	DIS3L2	NO	0.474841	23.7396	13.2429	19.0399	44.9745	34.7021	34.6439	15.5077	42.0519	28.4878	23.2473	33.7283
ENSSSCG00000027287	PEDS1	NO	0.703685	15.1701	10.5654	28.3307	50.5029	37.4622	45.8972	15.4654	23.9685	28.4203	24.1071	32.7335
ENSSSCG00000005655	DYNC2I2	NO	0.793308	22.9031	19.6405	22.934	38.3619	31.9791	30.4392	23.8298	36.958	28.3807	25.4115	31.3499
ENSSSCG00000025408	ULK4	NO	0.427728	23.7721	11.5929	17.9676	42.949	26.6344	33.2432	19.2526	51.3812	28.3491	21.9067	34.7916
ENSSSCG00000038800	PUF60	NO	0.710995	29.7073	20.5547	24.4959	32.8422	37.5515	34.0393	16.5081	30.5457	28.2806	27.0657	29.4955
ENSSSCG00000023041	PCBP3	NO	0.782302	25.4717	13.989	26.2477	43.8275	34.6439	33.5205	13.8053	34.5684	28.2592	25.0421	31.4763
ENSSSCG00000035315	TEX50	NO	0.036148	23.7977	2.33562	36.2577	17.6612	45.0937	34.5143	36.8697	29.54	28.2587	35.5047	21.0128
ENSSSCG00000013295	TRIM44	NO	0.876104	16.8981	18.1264	15.464	30.4304	59.2033	29.425	30.9046	24.8209	28.1591	30.6175	25.7007
ENSSSCG00000050273		NO	0.987858	38.094	14.9431	19.5875	31.3231	26.8189	26.9838	21.6174	45.722	28.1362	26.5295	29.743
ENSSSCG00000010298	CFAP70	NO	0.895412	26.4045	12.0815	20.4692	46.6656	32.1912	29.1055	21.764	36.2093	28.1114	25.2072	31.0155
ENSSSCG00000028485	YBX1	NO	0.0674525	24.2919	7.26672	29.2217	33.6716	35.1561	26.9074	44.6594	23.4553	28.0788	33.3323	22.8253
ENSSSCG00000002305	EXD2	NO	0.666178	23.9526	19.1681	18.5887	31.4493	34.7722	39.2857	21.6013	35.7598	28.0722	24.7287	31.4157
ENSSSCG00000016592	FSCN3	NO	0.78331	23.5996	11.4369	21.4424	44.7197	43.0724	41.697	11.4637	26.8266	28.0323	24.8945	31.1701
ENSSSCG00000009233	GPAT3	NO	0.64863	23.6948	13.1948	23.73	44.5579	32.4266	36.8506	13.7145	35.8999	28.0086	23.3915	32.6258
ENSSSCG00000007650	STAG3	NO	0.814015	18.7375	11.9198	24.2432	44.4468	36.4869	34.2171	19.8325	33.8153	27.9624	24.825	31.0998
ENSSSCG00000027323	NCBP2	NO	0.237732	23.764	17.5717	27.3117	58.4979	2.19075	14.7628	27.1859	52.174	27.9323	20.1131	35.7516
ENSSSCG00000008638	YWHAQ	NO	0.93458	22.9136	16.7526	19.3495	30.7239	37.074	32.049	32.3683	31.9198	27.8939	27.9264	27.8613
ENSSSCG00000021258	SLC35G6	NO	0.552139	19.0841	15.3684	24.8659	48.1794	34.5438	38.057	15.2672	26.7908	27.7696	23.4402	32.0989
ENSSSCG00000013094	DDB1	NO	0.929832	20.2952	11.4888	32.5455	56.7056	29.6042	28.0628	16.5542	26.0241	27.66	24.7498	30.5703
ENSSSCG00000026569	CLEC16A	NO	0.161036	16.0877	13.2476	21.9788	47.1113	32.5963	36.6583	16.2476	37.0267	27.6193	21.7276	33.511
ENSSSCG00000038826	NDUFV2	NO	0.95087	16.9415	8.24093	20.1529	67.4265	20.7413	22.9274	34.3451	30.1691	27.6181	23.0452	32.191
ENSSSCG00000012784	SSR4	NO	0.814178	20.8849	14.9123	19.9815	32.471	40.9213	28.4595	35.5459	27.6885	27.6081	29.3334	25.8828
ENSSSCG00000016732	TBRG4	NO	0.63152	24.6087	14.0116	21.3428	50.494	34.8909	39.062	11.6936	24.6698	27.5967	23.134	32.0593
ENSSSCG00000014414	RBM27	NO	0.345369	26.0439	6.86092	29.0361	39.9955	34.1822	30.4766	25.2781	28.8236	27.5871	28.6351	26.5392
ENSSSCG00000040103	GET4	NO	0.693063	25.2794	18.8935	24.7766	47.7047	28.2472	22.6419	15.5225	37.4263	27.5615	23.4564	31.6666
ENSSSCG00000016192	PLCD4	NO	0.876104	11.0099	10.1049	29.8782	40.0551	37.2212	36.6278	21.4892	33.8582	27.5306	24.8996	30.1615
ENSSSCG00000006523	MTX1	NO	0.681981	18.3443	13.6358	30.3106	52.1684	32.5905	37.1111	9.75005	25.6417	27.4441	22.7488	32.1393
ENSSSCG00000000141	EIF3D	NO	0.973009	18.6851	7.67022	23.3136	48.4356	30.4554	28.685	23.0692	38.2515	27.3207	23.8808	30.7606
ENSSSCG00000016577	ATP6V1F	NO	0.991535	18.8588	9.10461	17.0775	34.2803	53.7545	40.4336	16.0641	28.6266	27.275	26.4387	28.1113
ENSSSCG00000039119	PDXDC1	NO	0.868597	20.3077	12.6342	15.9017	44.2618	31.0165	29.1928	29.961	34.9091	27.2731	24.2967	30.2495
ENSSSCG00000007778	CCDC189	NO	0.749765	19.277	10.879	26.2639	43.1363	42.0968	39.5507	7.12293	29.7653	27.2615	23.6901	30.8328
ENSSSCG00000011995	CSNKA2IP	NO	0.705821	19.9897	8.46132	37.5181	41.7896	29.5104	31.0823	22.712	26.887	27.2438	27.4326	27.0551
ENSSSCG00000013539	GTF2F1	NO	0.190094	14.7724	7.282	52.2831	34.1703	42.0527	25.1107	21.1668	20.0742	27.114	32.5687	21.6593
ENSSSCG00000038107	SPINK2	NO	0.818928	21.5276	1.04522	14.6553	42.1697	47.3917	27.2817	20.2741	42.3211	27.0833	25.9622	28.2045
ENSSSCG00000017094	MARCHF6	NO	0.856572	21.8763	12.5727	21.0481	44.0626	34.0788	26.9749	18.9016	36.6836	27.0248	23.9762	30.0735
ENSSSCG00000029145	POMGNT1	NO	0.658819	16.5253	10.7449	21.7446	51.693	37.486	32.9057	15.1789	29.6721	26.9938	22.7337	31.2539
ENSSSCG00000028952	SLC10A6	NO	0.946929	58.2137	0	0	0	0	156.765	0	0	26.8724	14.5534	39.1913
ENSSSCG00000003716	SS18	NO	0.538635	14.5672	8.09014	22.0575	48.8096	37.3567	41.8673	16.1464	25.9487	26.8554	22.532	31.1789
ENSSSCG00000002380	ZC2HC1C	NO	0.483765	16.018	4.37765	39.8074	34.1969	51.7427	34.7919	11.5623	22.0656	26.8203	29.7826	23.858
ENSSSCG00000021285	RNF216	NO	0.67308	17.9544	7.66098	15.3976	44.8	29.3614	31.0272	23.2978	44.9536	26.8066	21.5028	32.1104
ENSSSCG00000031976	ANKRD53	NO	0.392962	18.676	12.8043	22.1388	43.8028	33.6917	38.2655	13.6535	30.743	26.7219	22.04	31.4039
ENSSSCG00000023325	ACY1	NO	0.973224	23.7954	11.3339	30.4978	56.2239	29.6513	23.4646	11.6532	27.0909	26.7139	23.8994	29.5283
ENSSSCG00000049211		NO	0.987894	27.1382	7.23784	20.3003	29.3898	40.462	50.2716	10.5793	27.9576	26.6671	24.6199	28.7142
ENSSSCG00000031172	RNF11	NO	0.92279	18.3794	15.6474	25.9931	39.5341	28.973	30.4354	24.4392	29.8766	26.6598	24.4461	28.8734
ENSSSCG00000024357	DNAI2	NO	0.56863	31.6508	21.4383	15.1364	35.063	24.1532	21.95	21.0512	42.7898	26.6541	22.9979	30.3103
ENSSSCG00000034495	SNTG1	NO	0.554384	20.0074	8.9852	18.4128	39.5047	39.8015	29.7906	19.8778	36.7447	26.6406	24.5249	28.7563
ENSSSCG00000016234	CUL3	NO	0.952118	21.4853	15.6595	26.9689	35.9998	32.3914	28.4401	22.8437	28.311	26.5125	25.9223	27.1026
ENSSSCG00000038652	TMEM191C	NO	0.842787	25.3232	28.8252	20.3565	34.3897	28.4601	26.2882	21.3522	27.0401	26.5044	23.873	29.1358
ENSSSCG00000010440	PTEN	NO	0.99841	5.49546	3.14398	39.2525	5.1628	58.7053	60.6956	3.169	36.2582	26.4854	26.6556	26.3152
ENSSSCG00000009302	USP12	NO	0.653033	16.8318	12.2417	23.8413	36.8713	27.256	37.6005	20.4073	36.4515	26.4377	22.0841	30.7912
ENSSSCG00000001691	RSPH9	NO	0.6755	13.4189	10.2002	22.3013	46.6058	43.5634	39.0252	10.1408	26.0221	26.4097	22.3561	30.4633
ENSSSCG00000015589	VASH2	NO	0.749765	22.2807	13.3474	21.7333	44.9117	28.4589	25.5414	18.9199	35.9689	26.3953	22.8482	29.9424
ENSSSCG00000013427	DAZAP1	NO	0.973473	21.4572	9.88204	19.6117	37.4825	35.8221	31.2332	21.18	34.1685	26.3547	24.5178	28.1916
ENSSSCG00000029652	TMBIM6	NO	0.975007	15.4875	12.2516	17.9472	33.7179	43.9422	33.9894	23.1965	29.26	26.224	25.1433	27.3047
ENSSSCG00000006202	CSPP1	NO	0.9061	27.3793	11.5517	25.9021	39.3967	27.5843	28.0297	20.0069	29.5674	26.1773	25.2181	27.1364
ENSSSCG00000010706	SAMD4B	NO	0.658819	19.1385	12.7626	23.6439	44.9193	29.5165	31.7917	17.336	30.1722	26.1601	22.4087	29.9114
ENSSSCG00000034385	ADAD2	NO	0.722428	20.6149	14.8704	19.9036	39.3182	32.6069	29.1577	17.3609	34.5455	26.0473	22.6216	29.473
ENSSSCG00000042673		NO	0.720058	26.8539	17.3738	22.227	31.6785	45.6113	45.84	2.835	15.9207	26.0425	24.3818	27.7032
ENSSSCG00000023680	MEPCE	NO	0.667186	18.9934	11.7327	7.64628	17.7153	57.4071	46.1198	15.0753	33.5755	26.0332	24.7805	27.2858
ENSSSCG00000048487		NO	0.793971	20.382	10.7528	18.7123	29.811	26.4665	31.6768	20.5173	49.9401	26.0323	21.5195	30.5452
ENSSSCG00000036056	DNAH17	NO	0.450246	16.8811	11.305	24.1402	46.1254	31.2687	33.5613	14.5327	30.296	26.0138	21.7057	30.3219
ENSSSCG00000011600	SLC6A6	NO	0.596373	16.9125	11.8677	25.0168	46.2911	28.7151	31.3827	17.112	30.7101	26.001	21.9391	30.0629
ENSSSCG00000003637	MAP7D1	NO	0.90142	16.8024	10.0157	35.3542	36.9646	31.0914	28.5252	21.084	28.1666	26.0005	26.083	25.918
ENSSSCG00000015864	MYO7B	NO	0.291558	19.4357	14.1992	18.0359	38.4914	33.5723	35.7595	15.074	33.2398	25.976	21.5295	30.4225
ENSSSCG00000040348	LIN7A	NO	0.666477	19.5223	8.69383	14.3972	48.6155	32.4725	29.8068	16.2727	37.76	25.9426	20.6662	31.219
ENSSSCG00000044685		NO	0.977558	22.4412	13.9701	21.1554	33.9741	35.0137	32.3403	19.2224	29.3068	25.928	24.4582	27.3978
ENSSSCG00000026689	ODAD1	NO	0.930314	17.4579	12.5958	43.4202	50.5807	21.8038	24.1247	18.333	19.0938	25.9262	25.2537	26.5987
ENSSSCG00000015558	SMG7	NO	0.978906	17.3061	9.7144	28.9847	36.8955	32.3751	37.1492	19.1609	25.6628	25.9061	24.4567	27.3555
ENSSSCG00000005910	TMEM249	NO	0.982928	19.969	11.8286	25.4595	40.2362	31.9877	36.6432	17.911	22.1471	25.7728	23.8318	27.7138
ENSSSCG00000009432	DGKD	NO	0.495759	16.5334	9.10721	16.8345	40.2005	35.6599	41.1422	14.6891	31.3576	25.6906	20.9292	30.4519
ENSSSCG00000032074	IRX2	NO	0.441629	10.5305	3.92428	64.1699	53.8739	24.2981	24.9417	11.9015	11.3309	25.6214	27.725	23.5177
ENSSSCG00000016583	FAM71F2	NO	0.850688	23.5453	8.99766	18.293	44.9406	33.096	40.5823	13.2101	22.2701	25.6169	22.0361	29.1977
ENSSSCG00000031380	MARCKSL1	NO	0.922243	27.0952	11.206	23.198	45.7351	24.8757	24.7704	22.8773	24.8714	25.5786	24.5115	26.6457
ENSSSCG00000039107	KNL1	NO	0.872225	23.1739	18.099	20.6228	26.441	21.4094	28.175	27.7683	38.7686	25.5573	23.2436	27.8709
ENSSSCG00000039094	PLEC	NO	0.863867	17.8361	22.9036	24.1863	31.5542	27.3966	26.823	22.9545	30.7293	25.5479	23.0934	28.0025
ENSSSCG00000017164	TIMP2	NO	0.787926	11.9204	8.04058	24.9688	46.1282	32.7554	37.494	16.8323	26.1559	25.5369	21.6192	29.4547
ENSSSCG00000008008	STUB1	NO	0.978612	16.4997	6.50257	20.987	41.0132	36.4998	34.7437	17.3871	30.5575	25.5238	22.8434	28.2043
ENSSSCG00000025794	FBRS	NO	0.7988	13.7423	9.76223	19.0172	37.3332	44.6714	36.8345	18.2779	23.7221	25.4201	23.9272	26.913
ENSSSCG00000029602	WDR37	NO	0.580048	20.8228	18.6785	16.0693	37.3953	24.6015	40.5494	21.8463	23.3221	25.4107	20.835	29.9863
ENSSSCG00000032831	BRI3BP	NO	0.693919	21.1031	17.5759	19.9681	38.0185	33.1206	30.3756	16.2226	26.8793	25.408	22.6036	28.2123
ENSSSCG00000038491	MEX3B	NO	0.787296	15.2806	10.5244	20.7795	31.1002	34.0726	37.3239	18.5913	35.4232	25.387	22.181	28.5929
ENSSSCG00000027551	NUDT15	NO	0.879169	27.8283	11.1216	13.369	20.1449	33.0557	10.8198	18.0209	68.7353	25.3869	23.0685	27.7054
ENSSSCG00000012847	TALDO1	NO	0.957992	14.7398	8.72067	19.0858	20.0597	35.1262	37.0206	27.9279	40.3688	25.3812	24.2199	26.5425
ENSSSCG00000000189	LMBR1L	NO	0.658149	14.2241	13.2718	21.4886	35.0674	30.817	29.1536	18.6541	39.9536	25.3288	21.296	29.3616
ENSSSCG00000038079	CLPP	NO	0.825172	6.86924	3.94744	19.8201	29.4433	44.2685	64.5694	11.7508	20.3887	25.1322	20.6772	29.5872
ENSSSCG00000000118	MICALL1	NO	0.892549	21.4513	14.9033	27.9284	41.5016	25.6729	26.242	16.7039	26.278	25.0852	22.9391	27.2312
ENSSSCG00000023540	ATP6V1FNB	NO	0.731578	17.1123	8.95214	22.7586	51.918	27.304	33.0905	14.0653	25.017	25.0272	20.31	29.7444
ENSSSCG00000007264	CDK5RAP1; SNTA1	NO	0.677208	11.469	7.55637	26.0097	51.6963	33.1946	34.1141	12.9427	22.9053	24.986	20.904	29.068
ENSSSCG00000003421	FBXO6; FBXO44	NO	0.850485	10.1356	7.60159	26.0893	37.7082	41.5872	39.4477	15.7846	21.2991	24.9567	23.3992	26.5142
ENSSSCG00000024667	MICU2	NO	0.896006	24.076	11.2466	19.3187	26.2351	29.7072	24.8805	23.5028	40.1722	24.8924	24.1512	25.6336
ENSSSCG00000011301	ZDHHC3	NO	0.915151	17.3904	9.95308	21.6509	42.108	41.6975	29.5314	14.0425	22.316	24.8362	23.6953	25.9771
ENSSSCG00000001611	NFYA	NO	0.724292	11.3936	7.08358	19.8357	43.1732	37.8232	36.4705	16.6294	25.8607	24.7837	21.4205	28.147
ENSSSCG00000017073	FAM114A2	NO	0.919111	33.4484	6.70341	14.2363	78.7293	14.0999	13.4492	23.0224	13.3372	24.6283	21.2018	28.0548
ENSSSCG00000040135	LOC100621024	NO	0.872436	16.2449	10.426	20.9235	47.7891	24.8838	29.2117	17.8182	29.3633	24.5826	19.9676	29.1975
ENSSSCG00000009330	ALOX5AP	NO	0.970453	24.3497	10.5156	22.36	39.7378	30.7193	28.0815	13.0365	27.5427	24.5429	22.6164	26.4694
ENSSSCG00000011074	ARHGAP21	NO	0.676677	22.2726	9.63835	23.9565	23.5737	31.2271	21.9701	22.8423	40.795	24.5345	25.0746	23.9943
ENSSSCG00000016203	CFAP65	NO	0.881364	12.1968	6.96744	21.5688	44.0524	37.389	41.9479	11.1958	20.8485	24.5208	20.5876	28.4541
ENSSSCG00000004538	WDR7	NO	0.215387	18.6463	13.8738	14.7843	37.6578	30.6624	31.3458	16.0276	33.0077	24.5007	20.0301	28.9713
ENSSSCG00000009208	HERC3	NO	0.674247	19.4139	10.3219	17.7278	40.7839	28.8695	25.9045	16.0387	36.6382	24.4623	20.5125	28.4121
ENSSSCG00000028840	EZH2	NO	0.62881	17.6203	8.73331	17.2564	37.5689	23.4581	34.5415	17.9929	38.271	24.4303	19.0819	29.7787
ENSSSCG00000022227	BRD4	NO	0.955924	15.1046	7.46643	18.6073	41.4552	32.38	31.3488	20.9497	27.6209	24.3666	21.7604	26.9728
ENSSSCG00000044254	SMKR1	NO	0.825117	18.7549	15.7428	19.4089	28.0941	25.5251	26.005	22.2483	36.7099	24.0611	21.4843	26.638
ENSSSCG00000026596	SYNRG	NO	0.754893	18.2069	11.7667	20.5922	36.635	38.1711	23.046	23.63	20.1609	24.0261	25.1501	22.9022
ENSSSCG00000023400	ZNF598	NO	0.89064	17.4678	14.137	23.9284	34.9213	28.2929	30.9185	18.1024	24.4047	24.0216	21.9479	26.0954
ENSSSCG00000003476	SPATA21	NO	0.598997	9.78423	8.35709	20.287	40.831	30.457	30.8971	17.7515	33.6972	24.0077	19.5699	28.4456
ENSSSCG00000032857	S100A12	NO	0.203029	102.136	10.1359	1.55913	6.50811	64.4415	4.72837	1.338	1.17565	24.0029	42.3687	5.63701
ENSSSCG00000011769	FXR1	NO	1.51e-06	27.346	5.05785	32.6249	16.3615	41.3976	18.1181	30.8156	20.2153	23.9921	33.046	14.9382
ENSSSCG00000037451	PPFIA1	NO	0.577013	18.4147	13.4509	26.071	29.8732	28.0641	32.2059	16.1736	27.2707	23.9405	22.1808	25.7002
ENSSSCG00000006217	DNAJC5B	NO	0.822194	22.2824	12.2143	24.7244	48.562	26.66	30.4064	9.96284	16.6625	23.9343	20.9074	26.9613
ENSSSCG00000009853	WSB2	NO	0.969456	18.2	9.72471	19.9535	33.2995	29.4286	35.4451	19.629	25.4291	23.8887	21.8028	25.9746
ENSSSCG00000037847	MOB2	NO	0.610888	16.6619	6.95031	14.7174	45.194	33.1176	34.72	12.322	26.9575	23.8301	19.2047	28.4555
ENSSSCG00000010329	ZMIZ1	NO	0.879169	19.0614	13.6595	19.5186	33.8524	34.1905	28.1537	15.6838	26.0086	23.7661	22.1136	25.4186
ENSSSCG00000039878	PLD6	NO	0.30797	22.1475	15.4943	10.9982	39.0982	25.8837	30.818	13.0232	32.4694	23.7416	18.0132	29.47
ENSSSCG00000023156	C3H2orf81	NO	0.411233	19.503	15.5909	16.3576	34.1499	27.7641	31.9972	14.6531	29.88	23.737	19.5694	27.9045
ENSSSCG00000002005	EMC9	NO	0.711474	23.75	13.5106	23.221	39.0612	22.7662	24.2851	11.6173	31.1932	23.6756	20.3386	27.0125
ENSSSCG00000037566	LOC106510645	NO	0.57566	6.37523	4.94346	22.3079	41.1993	36.6302	39.535	11.0216	27.069	23.6352	19.0837	28.1867
ENSSSCG00000003881	SPATA6	NO	0.909039	24.5496	12.2493	15.1361	27.6701	21.6692	22.263	28.126	37.1353	23.5998	22.3702	24.8294
ENSSSCG00000013661	EIF3G	NO	0.686711	24.1462	6.91524	17.9443	29.0168	30.4546	25.7494	24.38	30.0605	23.5834	24.2313	22.9355
ENSSSCG00000037061	RRP1	NO	0.698699	13.0978	13.9055	26.506	45.465	27.8889	26.349	12.17	23.2206	23.5753	19.9157	27.235
ENSSSCG00000017215	SLC16A5	NO	0.677208	15.9953	11.0279	26.8053	39.9979	26.7214	32.8444	12.1053	23.0739	23.5714	20.4068	26.736
ENSSSCG00000007151	CDC25B	NO	0.99841	20.3702	8.96	25.4191	36.0585	26.8024	20.7233	17.5841	32.5595	23.5596	22.544	24.5753
ENSSSCG00000000169	POLR3B	NO	0.53698	19.0348	11.308	21.4278	33.8176	31.7551	29.0932	14.7581	27.2814	23.5595	21.744	25.375
ENSSSCG00000008535	CLIP4	NO	0.469949	18.7802	8.08064	27.0606	31.7379	28.479	25.0614	23.4537	25.5463	23.525	24.4434	22.6066
ENSSSCG00000010968	IL11RA	NO	0.278015	19.9563	5.31929	7.48918	52.8348	30.8832	30.291	17.4591	23.8554	23.511	18.9469	28.0751
ENSSSCG00000046269	SAA4	NO	0.756975	12.3637	8.06912	22.7585	42.7158	30.4023	34.1974	14.9564	22.5097	23.4966	20.1202	26.873
ENSSSCG00000027428	ENHO	NO	0.519336	8.23238	6.44698	20.2136	42.4324	29.5485	40.1612	13.9143	26.6356	23.4481	17.9772	28.9191
ENSSSCG00000006752	CSDE1	NO	0.218456	27.4829	7.21409	17.3996	27.1152	27.9445	19.9219	30.6999	29.7731	23.4439	25.8817	21.0061
ENSSSCG00000000843	TXNRD1	NO	0.728202	24.8736	14.0488	14.3627	33.7117	23.9308	20.3048	17.8837	38.0854	23.4002	20.2627	26.5377
ENSSSCG00000008684	POLN	NO	0.423238	13.9216	8.87777	21.8333	48.1947	26.3418	30.2311	13.4448	23.8705	23.3395	18.8854	27.7935
ENSSSCG00000016409	UBE3C	NO	0.787296	19.1557	9.59212	16.0335	39.3176	31.6809	28.6998	14.6888	27.0918	23.2825	20.3898	26.1753
ENSSSCG00000040051	AOX4	NO	0.737721	20.3932	11.6564	17.1485	34.197	25.6511	25.6819	17.5718	32.6515	23.1189	20.1911	26.0467
ENSSSCG00000024232	CCDC91	NO	0.000582502	44.6109	1.79324	36.5835	22.3809	27.3373	19.5113	18.8539	13.7988	23.1087	31.8464	14.3711
ENSSSCG00000007247	KIF3B	NO	0.885893	14.2941	5.63164	28.1517	40.3454	34.1332	24.1887	12.6863	24.6733	23.013	22.3163	23.7098
ENSSSCG00000027840	COPE	NO	0.868597	17.3397	10.1668	25.4635	37.8527	25.414	28.4401	13.6691	25.6323	22.9973	20.4715	25.523
ENSSSCG00000002706	ADAT1	NO	0.35337	18.6792	11.6341	12.6914	40.4929	23.3873	22.8116	10.697	43.5661	22.9949	16.3637	29.6262
ENSSSCG00000003401	KIF1B	NO	0.891448	17.3906	7.405	19.7345	37.0531	28.2179	30.5335	15.6473	27.9581	22.9925	20.2476	25.7374
ENSSSCG00000002769	THAP11	NO	0.564208	18.4106	13.218	22.5333	42.4916	19.1047	21.1421	14.4952	32.35	22.9682	18.636	27.3004
ENSSSCG00000005920	BOP1	NO	0.561141	16.1436	13.7356	19.8787	35.7813	27.8713	29.4383	13.4933	27.224	22.9458	19.3468	26.5448
ENSSSCG00000026110	SRPK2	NO	0.667375	20.9126	8.37059	17.6093	36.1132	24.2057	29.0217	13.086	33.9599	22.9099	18.9534	26.8663
ENSSSCG00000003334	UBE2J2	NO	0.813806	15.7946	6.04616	10.3377	37.2537	28.4345	29.8597	21.0218	34.1453	22.8617	18.8972	26.8262
ENSSSCG00000007206	RBCK1	NO	0.842787	19.4872	9.65315	25.5657	50.4946	28.1567	25.847	7.35899	16.0139	22.8222	20.1421	25.5022
ENSSSCG00000017197	FBF1	NO	0.789868	12.8835	9.41668	17.8122	32.3789	34.6791	33.4402	15.9682	25.9211	22.8125	20.3358	25.2892
ENSSSCG00000000198	DNAJC22	NO	0.615957	15.6935	9.65681	24.3685	45.3003	22.7475	27.2383	11.7942	25.3577	22.7696	18.6509	26.8883
ENSSSCG00000008698	RGS12	NO	0.786989	12.4696	13.3867	18.0449	28.0566	36.5357	38.095	14.7879	20.7163	22.7616	20.4595	25.0636
ENSSSCG00000034475	LOC100517800	NO	0.897567	10.7031	16.7335	28.5029	18.6352	31.303	24.8987	26.8574	24.3775	22.7514	24.3416	21.1612
ENSSSCG00000036310	RFXANK	NO	0.581046	17.1968	9.90661	16.4696	37.1889	24.9512	26.11	13.3915	36.7868	22.7502	18.0023	27.4981
ENSSSCG00000032896		NO	0.728202	34.3896	7.54186	22.6078	25.3159	25.0323	29.8798	13.999	23.1348	22.7376	24.0072	21.4681
ENSSSCG00000001402	NFKBIL1	NO	0.782717	14.3436	9.41518	16.257	32.2542	24.3415	24.2699	21.3926	39.3363	22.7013	19.0837	26.3189
ENSSSCG00000021606	FLVCR2	NO	0.762252	19.4189	8.81098	22.9098	43.0767	22.668	17.4151	16.4836	30.3235	22.6383	20.3701	24.9066
ENSSSCG00000011454	SFMBT1	NO	0.712768	17.7337	7.8228	14.9346	33.778	23.0503	26.014	18.5711	39.1833	22.636	18.5724	26.6995
ENSSSCG00000035455	FAM219A	NO	0.763579	12.7721	11.7131	22.2301	39.0448	28.2788	27.7974	15.2379	23.9241	22.6248	19.6297	25.6198
ENSSSCG00000007074	TASP1	NO	0.726829	11.3625	6.62733	8.99729	35.6024	31.1671	24.2399	26.4797	35.9752	22.5564	19.5017	25.6112
ENSSSCG00000013033	BAD	NO	0.840504	15.0224	6.02864	17.418	25.0971	36.5607	39.6654	19.5614	21.0462	22.55	22.1406	22.9593
ENSSSCG00000002963	EIF3K	NO	0.2451	22.5751	3.16044	17.2474	27.3029	40.255	23.5613	29.2805	16.9092	22.5365	27.3395	17.7335
ENSSSCG00000031220	TEX35	NO	0.613021	31.2007	8.17404	20.2268	29.9373	34.3353	27.477	12.9895	15.1634	22.438	24.6881	20.1879
ENSSSCG00000017000	RANBP17	NO	0.879169	17.4846	4.57742	18.7094	36.2017	20.2381	28.7983	20.0607	32.9504	22.3776	19.1232	25.632
ENSSSCG00000009246	ENOPH1	NO	0.56725	22.0495	12.8798	15.843	45.3446	11.7836	13.045	12.0255	45.9572	22.366	15.4254	29.3066
ENSSSCG00000010468	CPEB3	NO	0.465564	12.1988	16.9433	15.8576	36.0711	32.5766	22.1196	9.7968	33.2158	22.3474	17.6074	27.0874
ENSSSCG00000014600		NO	0.477723	26.0743	18.041	13.929	26.4321	25.6469	28.9277	12.3947	27.2995	22.3431	19.5112	25.1751
ENSSSCG00000016494	BRAF	NO	0.955924	15.9108	7.34797	19.0433	50.8059	13.9781	20.9317	26.1711	24.5305	22.3399	18.7758	25.904
ENSSSCG00000043519		NO	0.776246	12.5388	20.5113	25.505	30.7733	32.0314	27.3119	7.57245	22.2427	22.3108	19.4119	25.2098
ENSSSCG00000022398	NUCKS1	NO	0.813638	23.5511	5.36346	14.9246	28.363	20.3137	28.8317	32.2723	24.5926	22.2766	22.7654	21.7877
ENSSSCG00000000694	GAPDH	NO	0.12397	24.8597	8.63186	22.4027	21.3845	25.2049	23.4724	42.6821	9.47477	22.2641	28.7874	15.7409
ENSSSCG00000010996	BAG1	NO	0.983206	17.3456	13.1559	16.4454	30.281	27.8887	23.7328	20.9182	28.3445	22.264	20.6495	23.8785
ENSSSCG00000007482		NO	0.776193	10.356	9.03022	20.8297	41.7308	31.1334	31.5537	14.3056	19.0331	22.2466	19.1562	25.3369
ENSSSCG00000002635	SPIRE2	NO	0.56863	10.6749	10.8862	12.993	23.243	37.1266	39.5185	15.0888	27.9875	22.1898	18.9708	25.4088
ENSSSCG00000007249	NOL4L	NO	0.874392	7.8511	6.31405	19.1399	40.1521	34.5291	25.9853	17.3091	25.5504	22.1039	19.7073	24.5005
ENSSSCG00000008372	EHBP1	NO	0.306836	27.348	6.16623	19.4258	27.1555	31.7318	27.137	17.8181	19.7796	22.0703	24.0809	20.0596
ENSSSCG00000039952	ZFAND3	NO	0.868597	15.6192	10.5784	21.1408	34.581	23.0867	25.9342	18.7406	26.8164	22.0622	19.6468	24.4775
ENSSSCG00000011314	LZTFL1	NO	0.787296	16.7493	8.25163	19.2866	39.5491	21.2512	23.8476	16.4754	30.9161	22.0409	18.4406	25.6411
ENSSSCG00000008035	GFER	NO	0.501756	16.4993	14.3305	12.2426	29.6081	26.463	33.4652	18.3427	25.2235	22.0219	18.3869	25.6569
ENSSSCG00000034888		NO	0.80268	11.8357	6.39586	20.4429	56.1925	21.8711	34.4022	6.99095	17.9599	22.0114	15.2852	28.7376
ENSSSCG00000015882	BAZ2B	NO	0.654778	33.8083	13.333	16.1684	24.1237	21.7511	20.7673	21.1768	24.7863	21.9894	23.2262	20.7526
ENSSSCG00000003712	OSBPL1A	NO	0.956986	19.5431	7.89159	13.2419	35.309	22.582	21.1159	21.0517	35.1625	21.9872	19.1047	24.8697
ENSSSCG00000003219	FAM71E1	NO	0.789648	20.2851	19.0083	18.9688	35.1655	24.8434	24.1543	12.9227	20.3372	21.9607	19.255	24.6663
ENSSSCG00000027045	LRRC56	NO	0.475466	13.8504	9.98687	13.8948	29.9645	32.0451	32.8962	12.8915	30.0933	21.9528	18.1705	25.7352
ENSSSCG00000006496	LMNA	NO	0.636608	14.2318	14.4931	16.9251	23.2394	22.4667	45.4548	19.034	19.4696	21.9143	18.1644	25.6642
ENSSSCG00000014048	HK3	NO	0.262784	0.460042	12.4969	4.66753	60.9226	7.66457	11.8912	28.6397	48.2924	21.8794	10.358	33.4008
ENSSSCG00000049079	CCDC179	NO	0.932579	24.6627	10.771	17.2191	29.412	32.6296	31.2696	8.57469	20.373	21.8639	20.7715	22.9564
ENSSSCG00000022963	UNKL	NO	0.960159	17.2437	19.5659	18.9043	19.9196	26.5587	31.7614	19.0645	20.9798	21.7497	20.4428	23.0567
ENSSSCG00000002813	KATNB1	NO	0.705091	14.0332	9.36679	40.434	35.7081	23.6249	23.5193	9.20383	17.9226	21.7266	21.824	21.6292
ENSSSCG00000030513	CFAP74	NO	0.605593	13.9663	8.89538	18.2316	40.9321	29.6995	27.8651	11.4355	22.7854	21.7264	18.3332	25.1195
ENSSSCG00000015893	SLC4A10	NO	0.99265	21.3975	8.1753	16.2037	31.7231	19.4016	20.5099	21.7338	34.5337	21.7098	19.6841	23.7355
ENSSSCG00000013405	EIF4G2	NO	0.0854094	23.5958	4.47835	17.9771	25.5622	27.331	20.2744	33.6297	20.5227	21.6714	25.6334	17.7094
ENSSSCG00000002660	MTHFSD	NO	0.0769162	14.6356	11.6155	15.1045	37.5006	25.0637	27.7415	11.4092	30.1924	21.6579	16.5533	26.7625
ENSSSCG00000023539	MBOAT2	NO	0.936284	14.016	10.9089	21.7708	29.391	29.9068	26.1047	14.962	26.0831	21.6429	20.1639	23.1219
ENSSSCG00000002260		NO	0.627162	20.2635	12.9723	10.6377	39.9135	28.86	18.1309	8.34039	33.6052	21.5904	17.0254	26.1555
ENSSSCG00000014878	PAK1	NO	0.794301	22.6829	7.50763	11.5779	27.9096	21.6488	19.7386	29.7196	31.8049	21.5737	21.4073	21.7402
ENSSSCG00000033246	SAYSD1	NO	0.983993	36.5565	25.7423	12.1318	18.7057	19.8304	16.0745	17.5883	25.8777	21.5634	21.5267	21.6
ENSSSCG00000010103	LOC100155138	NO	0.789648	11.2523	7.71882	17.3184	32.8305	32.0332	33.6256	14.2326	23.4459	21.5572	18.7091	24.4052
ENSSSCG00000010170	DISC1	NO	0.495339	15.2049	6.55601	14.4027	39.4897	24.0441	30.153	11.7121	30.7649	21.5409	16.341	26.7409
ENSSSCG00000014832	DNAJB13	NO	0.674437	7.98824	10.8345	16.0954	33.7412	31.3385	41.8945	14.2202	16.0571	21.5212	17.4106	25.6318
ENSSSCG00000003377	ACOT7	NO	0.705821	8.43036	8.22269	9.26007	43.129	41.0844	22.4596	8.03989	31.5198	21.5182	16.7037	26.3327
ENSSSCG00000013938	GATAD2A	NO	0.62881	17.4428	9.18852	14.6096	34.7802	22.0978	26.7056	16.5374	30.6743	21.5045	17.6719	25.3372
ENSSSCG00000003107	ARHGAP35	NO	0.787296	13.7802	8.86134	19.3955	36.9854	27.5968	26.6309	14.8234	23.7626	21.4795	18.899	24.06
ENSSSCG00000049083		NO	0.932012	15.101	29.7912	20.09	22.6174	18.5675	32.3605	20.7152	10.9607	21.2754	18.6184	23.9325
ENSSSCG00000033500	SNRPD2	NO	0.581046	25.4697	16.3425	12.189	28.9586	23.4589	25.209	13.5389	24.7249	21.2364	18.6641	23.8087
ENSSSCG00000007331	RBL1	NO	0.609786	18.0456	9.25648	11.8139	44.221	19.1252	20.362	18.2829	28.5507	21.2072	16.8169	25.5976
ENSSSCG00000004814	LRRC28	NO	0.99841	19.8691	7.42039	25.1452	28.0825	40.2446	18.3812	11.0531	19.2757	21.184	24.078	18.2899
ENSSSCG00000005706	ABL1	NO	0.781215	18.9573	11.9769	17.3886	37.8837	27.5026	22.9161	11.7216	21.0295	21.172	18.8925	23.4515
ENSSSCG00000013259	DGKZ	NO	0.523851	9.489	9.94809	22.4734	29.5572	38.2603	37.3685	7.63425	14.0921	21.1029	19.4642	22.7415
ENSSSCG00000040119	TIGD5	NO	0.865973	8.30114	16.4561	38.3222	46.7796	16.9328	21.9761	10.5538	9.42374	21.0932	18.5275	23.6589
ENSSSCG00000016069	CCDC150	NO	0.937258	18.7389	10.8096	22.7953	39.169	21.7193	23.9107	11.4795	20.0912	21.0892	18.6832	23.4951
ENSSSCG00000007855	REXO5	NO	0.731578	19.5081	11.2617	16.7981	39.1414	16.6703	29.1342	16.8343	19.3071	21.0819	17.4527	24.7111
ENSSSCG00000014792	STIM1	NO	0.55826	13.9912	9.37315	17.6345	36.6106	25.1185	24.2276	13.8017	27.8862	21.0804	17.6365	24.5244
ENSSSCG00000032170	DAPK3	NO	0.606628	14.9331	8.80414	20.3059	36.6154	24.8963	30.129	10.7977	21.8103	21.0365	17.7332	24.3397
ENSSSCG00000010799	COG7	NO	0.704215	15.8398	9.37698	13.2053	36.9485	23.5606	17.9316	15.7931	35.4942	21.0188	17.0997	24.9378
ENSSSCG00000030947	ZFAT	NO	0.640241	12.4246	10.1319	11.9457	29.848	26.9105	40.0526	12.8104	23.9659	21.0112	16.0228	25.9996
ENSSSCG00000033553		NO	0.653428	13.1897	8.75482	19.4317	42.8765	28.4803	30.6155	9.18966	15.4179	20.9945	17.5728	24.4162
ENSSSCG00000030274	PPEF1	NO	0.733691	17.1307	5.77105	19.3927	27.0549	30.7425	28.442	15.9347	23.1762	20.9556	20.8001	21.111
ENSSSCG00000030168	CYP19A3; CYP19A2; CYP19A1	NO	0.919909	21.7259	18.5817	20.559	20.669	25.8807	18.0247	17.1515	24.3062	20.8623	21.3293	20.3954
ENSSSCG00000001925	ADPGK	NO	0.605593	15.2361	6.80917	11.7265	33.009	21.6141	23.548	17.6427	36.9521	20.8172	16.5548	25.0795
ENSSSCG00000006831	SORT1	NO	0.665882	10.8709	6.65869	18.8726	33.5852	31.236	32.3646	9.80104	22.6695	20.7573	17.6951	23.8195
ENSSSCG00000010987	UBAP2	NO	0.728202	18.4814	8.35304	21.5287	25.0648	28.295	27.9843	15.9668	20.3287	20.7503	21.068	20.4327
ENSSSCG00000027587	SPAG1	NO	0.89587	18.6524	8.69564	16.9427	26.3974	25.973	29.7354	18.6625	20.9243	20.7479	20.0576	21.4382
ENSSSCG00000010136	TRMT2A	NO	0.804639	12.5344	11.6151	17.4872	29.4585	31.9969	30.7831	12.5787	19.3009	20.7193	18.6493	22.7894
ENSSSCG00000007308	ROMO1	NO	0.911833	20.2888	16.3289	22.3751	23.5772	16.0347	12.7187	27.6001	26.765	20.7111	21.5747	19.8474
ENSSSCG00000006501	SSR2	NO	0.192294	16.6059	3.87856	15.8681	19.5	41.6216	15.3191	26.9419	25.8367	20.6965	25.2594	16.1336
ENSSSCG00000009422	TSC22D1	NO	0.712768	9.75346	9.60367	22.2251	25.7106	26.3488	26.8239	19.904	25.0849	20.6818	19.5578	21.8058
ENSSSCG00000013030	PRDX5	NO	0.518737	32.3271	3.56895	10.6605	27.9316	26.701	23.8753	19.099	20.9946	20.6448	22.1969	19.0926
ENSSSCG00000009931	MVK	NO	0.754893	17.8844	11.2303	21.2229	29.6787	23.4702	20.3445	12.6442	28.5596	20.6293	18.8054	22.4533
ENSSSCG00000013432	MIDN	NO	0.625881	18.0868	19.9247	15.0627	26.1737	20.1317	26.4489	16.7833	22.3445	20.6195	17.5161	23.7229
ENSSSCG00000034863	PARD6A	NO	0.663481	9.29554	8.76232	14.6973	26.6466	35.9534	34.1462	10.6945	24.53	20.5907	17.6602	23.5212
ENSSSCG00000008475	MAP4K3	NO	0.604363	20.644	8.16709	27.6974	31.2109	21.2917	19.4872	15.395	20.6478	20.5676	21.257	19.8783
ENSSSCG00000031299	TECR	NO	0.569639	36.8672	16.5147	17.5042	25.2518	35.5126	15.1818	7.23528	10.4322	20.5625	24.2798	16.8451
ENSSSCG00000009290	MIPEP	NO	0.350838	10.2407	9.35208	11.9158	44.7713	16.4901	17.3623	8.21481	46.0675	20.5518	11.7154	29.3883
ENSSSCG00000013615	ECSIT	NO	0.728202	7.2974	6.4218	18.5918	38.601	28.5084	25.278	12.6554	27.0366	20.5488	16.7632	24.3344
ENSSSCG00000024552	CFAP92	NO	0.613669	14.1851	8.25874	21.7088	44.812	22.7648	23.8664	8.68947	19.9497	20.5294	16.8371	24.2217
ENSSSCG00000003493	CAPZB	NO	0.868402	10.249	2.9581	21.5509	45.0883	30.4009	31.3288	5.85078	16.7204	20.5184	17.0129	24.0239
ENSSSCG00000021818	ENOX1	NO	0.714983	15.2774	6.68242	18.1668	38.561	18.0659	23.8441	14.4838	29.0391	20.5151	16.4985	24.5317
ENSSSCG00000005654	SPTAN1	NO	0.605593	12.9715	8.73659	13.516	32.5774	29.6599	27.6301	14.3557	24.5352	20.4978	17.6258	23.3698
ENSSSCG00000008294	ACTG2	NO	0.935065	9.38395	3.43937	15.254	38.4566	25.6862	37.2497	12.6467	21.7682	20.4856	15.7427	25.2285
ENSSSCG00000022496	STK39	NO	0.955498	15.8494	8.90245	17.8714	29.1361	24.6592	22.691	16.7927	27.4343	20.4171	18.7932	22.0409
ENSSSCG00000005134	P14ARF	NO	0.94507	16.7512	12.3849	24.0916	10.0145	23.3416	28.1211	31.1179	17.4726	20.4119	23.8256	16.9983
ENSSSCG00000047135	LOC110255221	NO	0.841849	12.6096	10.5274	30.7548	26.9728	22.4008	18.7069	19.7426	21.5176	20.4041	21.3769	19.4312
ENSSSCG00000029778	SPATA17	NO	0.609016	14.2046	9.36185	18.697	35.4276	22.0279	21.6568	13.1557	27.511	20.2553	17.0213	23.4893
ENSSSCG00000008175	CHST10	NO	0.985308	10.3577	10.726	23.7337	16.6499	37.1501	37.16	9.30016	16.9488	20.2533	20.1354	20.3712
ENSSSCG00000031757	CARS2	NO	0.720513	17.8506	13.6006	9.51123	25.3113	30.955	32.3112	10.6376	21.6618	20.2299	17.2386	23.2212
ENSSSCG00000020744	DUSP3	NO	0.375709	12.2208	12.1604	16.0499	33.6289	23.1456	23.8759	12.8712	27.7979	20.2188	16.0719	24.3658
ENSSSCG00000010116	SLC25A1	NO	0.703685	12.5414	10.0155	15.6629	29.7371	29.8799	27.8886	11.8678	24.1387	20.2165	17.488	22.945
ENSSSCG00000013778	NDUFB7	NO	0.590666	23.8772	12.1777	14.1946	13.9364	25.4409	19.136	29.3976	23.4229	20.1979	23.2276	17.1683
ENSSSCG00000035532	ATP5F1D	NO	0.832438	9.49961	3.83242	17.5151	37.992	29.0269	35.7865	10.1062	17.7151	20.1842	16.537	23.8315
ENSSSCG00000006388	DCAF8	NO	0.982928	20.8168	8.85112	16.9848	28.8088	20.7464	25.3457	15.5012	24.2933	20.1685	18.5123	21.8247
ENSSSCG00000043778		NO	0.94507	8.49077	3.76135	25.449	40.3795	24.3145	26.7185	11.238	20.9643	20.1645	17.3731	22.9559
ENSSSCG00000013081		NO	0.626572	12.6941	8.40176	15.7711	36.4173	29.5732	27.7542	8.63949	21.903	20.1443	16.6695	23.6191
ENSSSCG00000036958		NO	0.745278	12.5182	12.5532	24.9178	34.0505	21.9259	24.0262	10.1843	19.7875	19.9954	17.3866	22.6043
ENSSSCG00000036852	TSEN54	NO	0.728202	12.8913	9.51867	16.6471	36.9334	22.9083	23.1236	15.1984	22.3116	19.9415	16.9112	22.9718
ENSSSCG00000022866	NXF1	NO	0.952238	18.4663	8.65714	13.2723	30.2503	22.5818	26.3967	18.3861	21.1945	19.9006	18.1766	21.6247
ENSSSCG00000034356		NO	0.839848	0.097922	0.041463	143.781	14.5301	0	0.352584	0	0.288464	19.8865	35.9698	3.80315
ENSSSCG00000002747	PMFBP1	NO	0.666805	10.9861	5.84014	21.9437	24.4769	29.5161	27.5685	16.3641	22.2852	19.8726	19.7025	20.0427
ENSSSCG00000037890	ZNF853	NO	0.972963	9.42066	5.65615	23.304	34.0416	21.5837	27.0961	16.4367	21.1178	19.8321	17.6863	21.9779
ENSSSCG00000009764	CCDC92	NO	0.868402	15.4265	12.7494	19.4134	10.2696	32.0177	32.5641	15.3294	20.7632	19.8166	20.5467	19.0866
ENSSSCG00000007702	FKBP6	NO	0.650795	17.4294	10.2721	9.65969	26.7737	24.5262	22.9387	15.1724	31.6259	19.7998	16.6969	22.9026
ENSSSCG00000037105	EVL	NO	0.822194	14.3682	12.6448	16.7113	28.8449	23.8103	26.1978	13.5966	21.7931	19.7459	17.1216	22.3701
ENSSSCG00000029160		NO	0.78331	20.1482	17.3912	22.8611	22.1087	24.2805	17.9879	16.9954	16.0655	19.7298	21.0713	18.3883
ENSSSCG00000025078	ZNF358	NO	0.803645	14.4616	10.5934	18.5931	30.3488	23.7096	28.3153	12.3933	19.1367	19.694	17.2894	22.0986
ENSSSCG00000007763	BCKDK	NO	0.739442	13.3905	7.29801	20.3563	33.7455	21.6316	21.3809	15.8449	23.6753	19.6654	17.8058	21.5249
ENSSSCG00000014214	TRIM36	NO	0.801769	19.0719	8.9186	18.2254	27.1569	25.4605	21.6665	15.7106	20.9229	19.6417	19.6171	19.6662
ENSSSCG00000028249	SKA3	NO	0.723134	10.1001	6.11422	22.0143	38.8053	22.6	24.2014	10.9375	22.26	19.6291	16.413	22.8452
ENSSSCG00000009973	RHBDD3	NO	0.44124	19.9617	16.0317	11.4375	33.5103	24.5783	29.0253	3.35806	19.1218	19.6281	14.8339	24.4223
ENSSSCG00000000684	USP5	NO	0.867687	14.0011	10.5646	16.7071	34.4405	29.6753	24.8803	10.1922	16.4441	19.6132	17.6439	21.5824
ENSSSCG00000035875	OS9	NO	0.75282	19.7787	11.5417	17.0922	31.8423	21.3909	24.0045	11.1428	20.0743	19.6084	17.3512	21.8657
ENSSSCG00000024974	RPL13	NO	0.0309676	21.4604	5.1223	21.4064	27.9249	25.7657	14.7511	24.6164	15.8178	19.6081	23.3122	15.904
ENSSSCG00000032887	EFCAB1	NO	0.99841	11.1793	3.83944	4.83285	9.14806	57.6743	49.3409	5.8293	14.489	19.5416	19.879	19.2043
ENSSSCG00000017120	SLC6A19	NO	0.668939	15.4676	8.11771	15.5407	30.0463	25.8833	27.9018	9.09386	24.0829	19.5168	16.4964	22.5372
ENSSSCG00000024789	SRRT	NO	0.113799	13.2266	4.394	23.5166	26.7278	34.3045	24.9703	14.5984	14.1195	19.4822	21.4115	17.5529
ENSSSCG00000033189	FAM3D; FAM107A	NO	0.9061	14.6105	8.33947	19.2491	32.7747	22.8531	20.7704	14.6464	22.4681	19.464	17.8398	21.0882
ENSSSCG00000026568	DNPH1	NO	0.699667	11.0141	3.14792	13.3959	48.9193	25.6253	24.2798	3.52858	25.7493	19.4575	13.391	25.5241
ENSSSCG00000014416	TCERG1	NO	0.91782	17.9822	9.29799	19.2008	28.2021	18.6776	26.5396	14.1505	21.1641	19.4019	17.5028	21.3009
ENSSSCG00000031572	MFF	NO	0.433778	23.6695	13.6426	22.256	16.3129	24.983	17.864	20.8963	15.4995	19.3905	22.9512	15.8297
ENSSSCG00000020710	PRDM2	NO	0.930316	13.9183	5.27519	13.7647	32.7107	16.4843	22.7765	17.3136	32.5307	19.3467	15.3702	23.3233
ENSSSCG00000038792	FAM221A	NO	0.751112	11.1008	3.40301	13.4113	31.4852	33.7337	29.6135	5.76104	26.2404	19.3436	16.0017	22.6855
ENSSSCG00000028707	NF2	NO	0.895412	13.8412	9.37496	15.4878	23.3324	25.9503	21.4537	18.677	26.5346	19.3315	18.4891	20.1739
ENSSSCG00000017971	NAA38	NO	0.853347	13.9944	6.98667	9.75415	20.0009	29.1341	27.5877	14.5374	32.1294	19.2656	16.855	21.6762
ENSSSCG00000035741	TOR1AIP2	NO	0.385282	9.10357	19.8654	10.9838	19.2095	15.6138	18.1296	21.0614	39.7792	19.2183	14.1906	24.2459
ENSSSCG00000003199	AP2A1	NO	0.745445	21.7866	14.0107	11.9259	21.8579	22.6962	24.2222	13.7274	23.5098	19.2171	17.534	20.9002
ENSSSCG00000023001	CCDC149	NO	0.862591	14.6498	8.02695	12.879	26.3471	25.9356	25.2272	15.8668	24.5225	19.1819	17.3328	21.0309
ENSSSCG00000032585	ZNF613	NO	0.502764	12.4323	9.29573	9.9668	24.6504	22.9035	21.8405	18.2867	33.795	19.1464	15.8974	22.3954
ENSSSCG00000007160	DDRGK1	NO	0.0649334	25.199	9.86564	32.222	18.287	23.901	11.7237	16.7723	15.1366	19.1384	24.5236	13.7532
ENSSSCG00000024240	CCDC9	NO	0.868402	16.8068	13.0272	11.1432	20.9937	24.2378	26.6031	18.0168	22.1484	19.1221	17.5511	20.6931
ENSSSCG00000029571	AVIL	NO	0.708814	10.7696	14.9698	26.7349	28.0068	13.8766	24.2988	13.4008	20.8282	19.1107	16.1955	22.0259
ENSSSCG00000037963	CIBAR1	NO	0.781215	11.7408	9.27089	17.5451	25.5943	22.1284	22.7433	9.82181	33.9459	19.0988	15.309	22.8886
ENSSSCG00000026665	PPM1D	NO	0.526778	18.3011	8.58912	12.0821	32.9282	17.202	19.5349	12.5954	31.4863	19.0899	15.0452	23.1346
ENSSSCG00000018080	ATP8	NO	0.894744	1.74705	23.5561	0.009556	40.3123	0	34.9082	52.0931	0.000193	19.0783	13.4624	24.6942
ENSSSCG00000040863	IPMK	NO	0.962434	13.896	17.5425	15.171	19.4489	22.0773	24.6199	20.7546	18.2157	18.9658	17.9748	19.9568
ENSSSCG00000033887	PLA2G2E	NO	0.975007	8.89268	8.0216	31.6586	34.8412	28.6263	25.6775	5.89679	8.01562	18.9538	18.7686	19.139
ENSSSCG00000034427	MEX3C	NO	0.981004	7.39335	8.63389	13.5083	18.456	26.7895	22.1363	25.918	28.7892	18.9531	18.4023	19.5038
ENSSSCG00000025791	MON1A	NO	0.477723	4.74877	9.34993	14.549	33.3745	26.7636	23.5273	11.109	28.0858	18.9385	14.2926	23.5844
ENSSSCG00000021065	NAA60	NO	0.949295	15.232	11.5445	20.8475	22.0127	27.0351	28.7554	9.21785	16.861	18.9382	18.0831	19.7934
ENSSSCG00000013239	PSMC3	NO	0.997222	9.48589	4.93627	8.71635	19.4719	32.4866	17.0858	28.4553	30.294	18.8665	19.786	17.947
ENSSSCG00000025221	PAXIP1	NO	0.819895	14.5019	11.2078	13.8453	24.1676	17.6688	25.8076	18.6519	24.6682	18.8149	16.167	21.4628
ENSSSCG00000040448		NO	0.521956	10.0751	6.81567	5.9636	22.2524	40.1757	44.4803	4.73446	15.9236	18.8026	15.2372	22.368
ENSSSCG00000006497	MEX3A	NO	0.754561	11.4626	11.163	14.2474	26.4341	22.0544	25.9989	16.8282	22.1914	18.7975	16.1482	21.4469
ENSSSCG00000034753	FAM177A1	NO	0.609016	13.3707	5.06226	8.67309	64.6482	14.3629	14.131	10.3247	19.7338	18.7883	11.6828	25.8938
ENSSSCG00000010002	SF3A1	NO	0.876104	16.9033	8.77706	15.7744	26.1636	30.4075	28.5555	11.721	11.4567	18.7199	18.7016	18.7382
ENSSSCG00000028814	SOD3	NO	0.853347	7.80991	21.9561	19.3664	22.7361	17.8146	29.4887	17.7282	12.7395	18.7049	15.6798	21.7301
ENSSSCG00000017963		NO	0.596373	13.0873	5.79771	18.8562	40.4675	19.6556	25.4515	6.94139	19.3174	18.6968	14.6351	22.7585
ENSSSCG00000014122	SPZ1	NO	0.0299854	27.0015	2.61262	25.1222	18.4539	25.806	17.7167	17.9094	14.7736	18.6745	23.9598	13.3892
ENSSSCG00000038947	HNRNPC	NO	0.819895	24.278	4.20189	11.9531	28.6575	16.6858	18.6813	23.1268	21.5025	18.6359	19.0109	18.2608
ENSSSCG00000022039		NO	0.737721	12.1933	7.34295	19.305	37.7348	23.2293	22.0375	8.71181	18.341	18.612	15.8598	21.3641
ENSSSCG00000023771	LOC100625134	NO	0.879169	18.256	6.55367	14.4804	32.4746	18.4758	20.934	12.973	24.7433	18.6114	16.0463	21.1764
ENSSSCG00000000071	ST13	NO	0.533773	13.5286	4.41349	12.5335	32.5953	15.899	17.1409	22.3823	30.0826	18.572	16.0859	21.0581
ENSSSCG00000003111	SAE1	NO	0.859474	19.3794	8.69816	11.4302	30.7958	20.13	21.3813	12.5808	24.124	18.565	15.8801	21.2498
ENSSSCG00000008451	PPM1B	NO	0.822194	16.4331	5.9152	13.7885	23.3667	18.7666	17.8696	28.3569	23.8286	18.5406	19.3363	17.745
ENSSSCG00000026392	BSDC1	NO	0.93384	4.27099	1.96324	23.9526	50.2438	8.19348	6.16692	19.2634	33.7483	18.4753	13.9201	23.0306
ENSSSCG00000026087	GKAP1	NO	0.978723	18.2332	8.57362	14.0014	25.21	22.3654	20.2675	15.4545	23.6841	18.4737	17.5136	19.4338
ENSSSCG00000025109	PLD3	NO	0.674247	10.2641	8.00002	17.8735	30.2237	27.129	27.488	9.9169	16.6745	18.4462	16.2959	20.5966
ENSSSCG00000035933	MAPK15	NO	0.791377	12.411	17.4068	22.1132	28.9327	22.3832	20.8391	9.7326	13.5454	18.4205	16.66	20.181
ENSSSCG00000029902	C11orf80	NO	0.537027	14.3932	9.95165	14.478	32.1286	17.8313	22.5736	13.0816	22.8912	18.4161	14.946	21.8862
ENSSSCG00000032889	ASB12	NO	0.779717	9.04491	8.08999	26.6925	40.7496	15.5999	23.012	9.6096	14.3754	18.3968	15.2367	21.5568
ENSSSCG00000002001	REC8	NO	0.733671	12.9422	6.78335	15.2395	33.1611	22.9655	21.3037	11.0006	23.7777	18.3967	15.5369	21.2565
ENSSSCG00000014628	APBB1	NO	0.830302	12.746	9.7608	19.4	29.2082	16.9708	18.0507	15.0898	25.9021	18.391	16.0516	20.7305
ENSSSCG00000003332	SDF4	NO	0.98345	13.1239	7.31687	14.1449	22.8162	36.6493	23.1119	10.687	19.2764	18.3908	18.6513	18.1304
ENSSSCG00000010759	GLRX3	NO	0.667375	18.8609	9.90514	6.00382	31.9646	14.1222	20.8039	10.8582	34.2861	18.3506	12.4613	24.2399
ENSSSCG00000009162	SLC9B1	NO	0.731885	17.6051	8.5922	13.0706	30.1424	17.3904	16.8417	12.6288	30.1053	18.297	15.1737	21.4204
ENSSSCG00000031877	ABHD8	NO	0.699667	10.914	7.93869	17.8723	37.9641	21.5022	21.2688	10.4524	18.4393	18.294	15.1853	21.4027
ENSSSCG00000000132	TEX33	NO	0.766765	9.28439	8.89534	13.4187	24.8473	34.5936	27.0611	8.5599	19.6284	18.2861	16.4641	20.108
ENSSSCG00000003196	PTOV1	NO	0.978043	10.8396	7.33543	24.0629	35.5666	21.322	23.4118	10.2474	13.2256	18.2514	16.618	19.8848
ENSSSCG00000038125	NUP210L	NO	0.946929	11.0763	5.36035	12.656	25.0737	26.9926	29.3756	14.95	20.3422	18.2283	16.4187	20.038
ENSSSCG00000017126	NARF	NO	0.874246	15.2737	12.8352	20.5367	24.7221	19.562	22.594	12.3878	17.8305	18.2177	16.9401	19.4954
ENSSSCG00000003435	MIIP	NO	0.266752	10.9707	10.659	11.4087	33.019	26.029	25.9934	7.56607	19.9888	18.2043	13.9936	22.4151
ENSSSCG00000003468	PLEKHM2	NO	0.62881	7.29939	5.29618	11.3437	25.2356	33.7802	31.0381	10.6225	20.8942	18.1887	15.7614	20.616
ENSSSCG00000013992	ARF1	NO	0.266016	16.6811	5.61854	9.75565	20.4529	27.744	20.6071	24.4248	20.2181	18.1878	19.6514	16.7242
ENSSSCG00000008621	NBAS	NO	0.37961	14.4459	8.5651	14.0499	30.6106	18.8155	21.9689	11.7779	25.1247	18.1698	14.7723	21.5673
ENSSSCG00000008433	STPG4	NO	0.00611646	28.6138	4.87388	19.8888	24.5748	22.8096	9.96559	23.6494	10.9468	18.1653	23.7404	12.5903
ENSSSCG00000010025	LIMK2	NO	0.787926	10.4314	12.3756	21.9862	31.4183	26.7663	24.9326	9.08055	8.20948	18.15	17.0661	19.234
ENSSSCG00000028293	RCOR3	NO	0.924082	11.74	11.5673	15.5809	25.7115	21.9936	22.3837	18.329	17.5639	18.1087	16.9109	19.3066
ENSSSCG00000035629	CA5A	NO	0.836175	7.30252	4.5427	13.7137	36.7775	34.8766	31.4164	4.23209	11.9072	18.0961	15.0312	21.161
ENSSSCG00000003717	PSMA8	NO	0.473112	11.7883	8.16165	10.1459	31.556	24.3497	22.5263	8.82023	27.4148	18.0954	13.776	22.4147
ENSSSCG00000011811	LPP	NO	0.941006	17.8257	3.01774	13.9276	20.5704	28.4311	37.4737	7.46054	16.0185	18.0907	16.9113	19.2701
ENSSSCG00000049448	LOC100738899	NO	0.819895	29.8837	17.8237	18.3994	11.7034	17.2263	16.075	13.4031	19.9198	18.0543	19.7281	16.3805
ENSSSCG00000036434	TPGS1	NO	0.962891	15.4667	15.8193	19.2246	24.8575	15.6339	14.8245	17.2468	21.1675	18.0301	16.893	19.1672
ENSSSCG00000018094	CYTB	NO	NA	0	78.3285	0	0	0	0	0	65.7903	18.0149	0	36.0297
ENSSSCG00000020675	ATF7IP2	NO	0.949713	14.7671	7.00236	11.8882	23.6777	28.674	23.2853	14.5826	19.9114	17.9736	17.478	18.4692
ENSSSCG00000008232	RNF181	NO	0.8005	9.94317	4.40992	17.089	33.3129	24.5767	26.5504	8.0489	19.6016	17.9416	14.9144	20.9687
ENSSSCG00000010099	LOC100510930	NO	0.876104	13.093	9.95551	11.1382	19.6291	23.6486	25.5351	17.3584	22.991	17.9186	16.3095	19.5277
ENSSSCG00000021363	CHD3	NO	0.663117	12.594	5.24357	20.6419	26.1084	23.2597	24.9445	14.8628	15.6932	17.9185	17.8396	17.9974
ENSSSCG00000028109	SNTB2	NO	0.885893	10.973	9.43374	13.6406	22.8128	26.9903	23.4895	14.7179	21.1222	17.8975	16.5804	19.2145
ENSSSCG00000033586	DBNDD2	NO	0.532038	14.4722	12.5977	15.3292	32.748	21.8449	22.4522	8.66257	15.0505	17.8947	15.0772	20.7121
ENSSSCG00000032443	KIAA0895L	NO	0.695666	11.7531	9.84965	18.6079	32.8964	21.8239	19.3688	9.40204	19.3429	17.8806	15.3967	20.3644
ENSSSCG00000025514	RUFY3	NO	0.517808	13.6761	4.73376	20.5858	21.2816	20.6158	24.9203	16.1667	21.0487	17.8786	17.7611	17.9961
ENSSSCG00000025266	VWA3A	NO	0.177889	11.1609	6.27515	11.5502	32.4993	20.5032	27.3508	9.45207	24.067	17.8573	13.1666	22.5481
ENSSSCG00000012382	IGBP1	NO	0.894744	14.4255	4.89992	14.2983	26.7646	22.5153	20.5596	16.2856	23.0498	17.8498	16.8812	18.8185
ENSSSCG00000034980	IRF8	NO	0.118619	0.040792	8.23339	10.2153	21.3432	23.3721	31.8476	0.017905	47.404	17.8093	8.41152	27.207
ENSSSCG00000000661	PHC1	NO	0.529331	4.69634	4.43765	13.9272	27.1231	33.7784	33.1084	7.82847	17.4958	17.7994	15.0576	20.5412
ENSSSCG00000033620	SLC25A10	NO	0.5577	8.96324	6.99492	15.9809	30.8721	22.905	25.7709	10.6515	20.2305	17.7961	14.6252	20.9671
ENSSSCG00000033570	ATP7B	NO	0.761953	6.97501	6.11509	17.413	29.4346	21.7286	21.4408	15.0073	24.2526	17.7959	15.281	20.3108
ENSSSCG00000009298	CDK8	NO	0.811029	12.5706	9.33045	13.786	29.143	21.7644	24.6345	11.1563	19.6367	17.7527	14.8193	20.6862
ENSSSCG00000010669	PDZD8	NO	0.952666	12.8504	9.7294	16.1945	26.0114	23.3799	21.0519	14.0077	18.6652	17.7363	16.6081	18.8645
ENSSSCG00000008555	CGREF1	NO	0.961563	9.23897	4.62992	14.5874	19.0225	19.9923	20.7265	16.9178	36.5371	17.7066	15.1841	20.229
ENSSSCG00000037516	MTF1	NO	0.978612	11.9407	8.79296	18.874	16.0708	25.8077	28.0473	12.2646	19.4983	17.662	17.2217	18.1023
ENSSSCG00000004355		NO	0.682141	14.5622	10.8369	33.1909	15.4073	21.619	17.0878	15.0168	13.4543	17.6469	21.0972	14.1966
ENSSSCG00000032531	SMG1	NO	0.851581	12.3944	7.87115	5.21994	36.4625	25.0701	15.0951	6.3694	32.6712	17.6442	12.2635	23.025
ENSSSCG00000030048	PLEKHG2	NO	0.717322	10.1806	5.64842	16.9904	32.9267	21.7293	22.4081	9.97852	21.1308	17.6241	14.7197	20.5285
ENSSSCG00000000633	YBX3	NO	0.662032	17.458	7.4107	14.5167	19.0681	17.7077	20.0429	26.9594	17.7953	17.6198	19.1605	16.0792
ENSSSCG00000023204	AXIN1	NO	0.704215	4.9143	5.9112	38.1786	62.1858	7.15518	7.95496	5.74185	8.8543	17.612	13.9975	21.2266
ENSSSCG00000026537	CACNA2D4	NO	0.725583	16.2304	8.55685	13.0582	35.1225	21.6399	21.2088	9.21132	15.7946	17.6028	15.035	20.1707
ENSSSCG00000009873	DTX1	NO	0.663993	8.52915	7.16771	19.9194	35.9224	21.8022	21.404	8.36711	17.2796	17.5489	14.6544	20.4434
ENSSSCG00000022534	ZNF644	NO	0.921569	15.0077	6.56963	11.5317	22.759	20.5423	25.5055	16.606	21.8645	17.5483	15.9219	19.1747
ENSSSCG00000039460	RPL28	NO	0.0188772	11.3275	5.05642	13.919	14.6676	32.8199	21.3868	28.2862	12.8842	17.5435	21.5882	13.4988
ENSSSCG00000003369	ICMT; RPL22	NO	0.0171017	17.909	3.89011	17.8793	7.01453	39.1071	11.9745	34.371	8.0772	17.5278	27.3166	7.73909
ENSSSCG00000012063	VPS26C	NO	0.909129	13.9617	8.68021	17.623	20.9278	25.1142	14.5957	12.8759	26.3935	17.5215	17.3937	17.6493
ENSSSCG00000016117	CARF	NO	0.304001	21.0224	2.85533	13.6497	23.9379	22.466	20.3637	21.5103	14.022	17.4784	19.6621	15.2947
ENSSSCG00000002776	ATP6V0D1	NO	0.972458	9.1667	6.59404	10.8233	19.3146	35.1741	35.8239	10.7803	12.0481	17.4656	16.4861	18.4452
ENSSSCG00000040146	PRSS45P	NO	0.876554	13.0369	5.71136	17.8177	36.4204	23.178	23.064	5.83241	14.3358	17.4246	14.9662	19.8829
ENSSSCG00000028444	ARMC10	NO	0.812212	14.6485	18.8488	19.5327	20.1396	12.9123	21.5318	13.7836	17.9788	17.422	15.2193	19.6247
ENSSSCG00000031639	ZCCHC17	NO	0.739442	6.54465	5.23866	26.3404	15.6601	28.8465	23.7662	16.4242	16.5413	17.4203	19.5389	15.3016
ENSSSCG00000009746	RAN	NO	0.533773	14.0124	3.9216	20.6918	25.9418	20.7805	19.8417	15.2683	18.8065	17.4081	17.6883	17.1279
ENSSSCG00000003068	SMG9	NO	0.542802	9.82099	9.78441	13.84	29.8188	21.3345	18.8512	12.4854	23.2863	17.4027	14.3702	20.4352
ENSSSCG00000004531	C18orf54	NO	0.810794	13.0527	8.99643	13.4247	20.6353	25.1004	28.0654	10.587	19.2199	17.3852	15.5412	19.2292
ENSSSCG00000004364	HACE1	NO	0.385282	13.4883	7.04512	9.86152	26.9286	19.8441	23.7815	11.9624	25.8957	17.3509	13.7891	20.9128
ENSSSCG00000021482	PLAAT5	NO	0.590678	13.3629	7.90199	11.4106	28.2055	24.3014	23.6927	9.796	19.896	17.3209	14.7177	19.924
ENSSSCG00000009773	RILPL1	NO	0.163729	12.7744	9.87817	10.5993	23.4148	21.4099	32.3061	8.72128	19.1578	17.2827	13.3762	21.1892
ENSSSCG00000011356	UQCRC1	NO	0.962651	10.0053	6.0268	13.7757	35.6589	25.6386	21.6628	11.2851	14.0847	17.2672	15.1762	19.3583
ENSSSCG00000001062	DTNBP1	NO	0.325974	20.7416	13.0668	14.3991	34.1357	14.6079	23.7729	5.10468	12.1478	17.2471	13.7133	20.7808
ENSSSCG00000016378	PASK	NO	0.866053	10.0389	6.22713	11.5284	18.6286	33.6715	36.5519	7.495	13.7895	17.2414	15.6835	18.7993
ENSSSCG00000011386	MST1	NO	0.382065	11.0721	9.0678	13.9329	38.4592	24.6069	21.6137	4.78272	14.2782	17.2267	13.5986	20.8547
ENSSSCG00000004979	MYO9A	NO	0.932	15.8961	7.20915	13.3888	22.5444	19.1289	21.961	13.9529	23.6918	17.2216	15.5917	18.8516
ENSSSCG00000002811	CNGB1	NO	0.54756	10.1874	4.85168	26.4877	32.1967	23.8554	18.7746	10.1595	11.2555	17.2211	17.6725	16.7696
ENSSSCG00000031958	KCTD2	NO	0.80268	9.99671	5.72728	15.4478	28.9025	23.7328	23.9535	10.4358	19.4562	17.2066	14.9033	19.5099
ENSSSCG00000045208	PMAP-36	NO	0.960259	15.9468	17.8939	32.1491	19.0718	11.6793	11.4217	11.9087	17.3604	17.179	17.921	16.4369
ENSSSCG00000023273	SH3YL1	NO	0.927075	23.3471	10.237	13.3757	24.7837	16.3018	14.9275	12.4854	21.952	17.1763	16.3775	17.975
ENSSSCG00000011120	USP6NL	NO	0.956986	8.02835	7.78749	18.7335	25.7792	22.7137	16.0216	14.9592	23.3707	17.1742	16.1087	18.2397
ENSSSCG00000039701	DCAF5	NO	0.18851	10.3521	6.89932	15.7204	37.6545	17.8373	21.1949	8.35822	19.3064	17.1654	13.067	21.2638
ENSSSCG00000013742	NFIX	NO	0.433778	15.3003	4.93973	8.58126	39.5733	25.7555	21.9529	10.3774	10.2447	17.0906	15.0036	19.1776
ENSSSCG00000001779	ZFAND6	NO	0.950903	11.7072	6.10126	13.9181	28.035	18.1498	17.1256	16.8542	24.6501	17.0677	15.1573	18.978
ENSSSCG00000031810	NGRN	NO	0.731578	8.99732	5.02035	15.7851	28.419	23.2802	24.8827	9.53011	20.5327	17.0559	14.3982	19.7137
ENSSSCG00000038776	GET3	NO	0.653033	12.2371	7.20737	9.63487	23.6485	24.3674	22.3017	11.718	25.0193	17.0168	14.4894	19.5442
ENSSSCG00000016582	FAM71F1	NO	0.744087	7.49091	2.68847	10.4876	28.1559	26.4351	33.6843	9.42602	17.7652	17.0167	13.4599	20.5735
ENSSSCG00000015735	PTPN18	NO	0.973224	15.19	14.229	10.268	15.6221	34.9053	15.5441	11.0455	19.2649	17.0086	17.8522	16.165
ENSSSCG00000049336	H2BE1	NO	0.81165	19.2576	12.0088	25.1943	16.1704	18.6587	12.6582	12.592	19.4133	16.9942	18.9256	15.0627
ENSSSCG00000007026	VDAC3	NO	0.995409	14.292	9.16171	11.6523	17.1973	19.189	22.6255	18.2361	23.4346	16.9736	15.8423	18.1048
ENSSSCG00000003940	HYI	NO	0.627011	9.34676	10.0201	9.73995	33.9666	28.7823	15.3501	8.80414	19.6614	16.9589	14.1683	19.7495
ENSSSCG00000039183		NO	0.957149	5.66681	31.5745	11.3511	6.39028	15.272	20.2048	26.5112	18.6555	16.9533	14.7003	19.2063
ENSSSCG00000006760	HIPK1	NO	0.937258	10.8754	4.8288	17.3931	34.2813	15.2813	19.3367	13.7275	19.7084	16.9291	14.3193	19.5388
ENSSSCG00000024623	USP25	NO	0.673754	13.9668	6.92846	13.9117	22.594	25.6863	20.2737	17.8383	14.1577	16.9196	17.8508	15.9885
ENSSSCG00000037686	TBL3	NO	0.551867	8.27136	7.58717	11.3572	31.9553	17.6837	34.7808	8.31891	15.378	16.9166	11.4078	22.4253
ENSSSCG00000005607	RALGPS1	NO	0.627162	10.9833	7.20111	15.4954	30.1595	14.2123	24.4172	9.90003	22.8845	16.9067	12.6478	21.1656
ENSSSCG00000010156	ARID4B	NO	0.666805	15.9316	9.63541	13.9209	18.6475	19.9883	19.8766	13.809	23.1755	16.8731	15.9125	17.8338
ENSSSCG00000016187	CATIP	NO	0.9396	12.9288	11.0074	12.3064	21.3414	22.8192	22.949	14.9833	16.565	16.8626	15.7594	17.9657
ENSSSCG00000030908	PABIR3	NO	0.865335	9.02749	8.41861	14.8788	51.3267	10.7215	12.6755	9.08207	18.3878	16.8148	10.9275	22.7022
ENSSSCG00000034468	BAG4	NO	0.83313	10.4925	5.40436	16.9404	29.9543	21.3662	23.9223	9.4852	16.848	16.8016	14.5711	19.0322
ENSSSCG00000041409	MFSD4B	NO	0.868597	14.3254	10.9083	20.1671	16.0069	15.3286	29.2962	8.88849	19.0402	16.7451	14.6774	18.8129
ENSSSCG00000016938	IPO11	NO	0.687713	14.1066	6.84234	11.047	26.872	18.2226	25.8047	10.7725	20.2823	16.7437	13.5372	19.9503
ENSSSCG00000029295	BPIFB4	NO	0.586031	10.9971	6.2099	14.9834	37.3912	25.8231	26.6987	3.62262	8.1827	16.7386	13.8566	19.6206
ENSSSCG00000005976	NDUFB9	NO	0.79589	15.1656	7.76187	19.0198	24.6331	19.7676	11.922	16.0326	19.5758	16.7348	17.4964	15.9732
ENSSSCG00000025942	MCCC1	NO	0.883157	14.5241	5.24534	12.3249	25.8277	19.1114	20.5289	17.4864	18.7325	16.7227	15.8617	17.5836
ENSSSCG00000030668	C7H6orf125	NO	0.71285	19.677	10.0615	17.9859	24.4843	17.491	14.7024	14.4688	14.7714	16.7053	17.4057	16.0049
ENSSSCG00000016323	COPS8	NO	0.533773	10.9622	7.23041	12.556	25.4094	25.8464	26.3576	8.78761	16.4635	16.7016	14.5381	18.8652
ENSSSCG00000011858	ZNF148	NO	0.666489	17.3275	7.80448	9.38766	26.9343	15.7179	19.5391	13.4438	23.439	16.6992	13.9692	19.4292
ENSSSCG00000030108	ZNFX1	NO	0.797504	12.8239	6.31969	19.3932	23.2928	22.9609	15.5923	11.9502	21.2364	16.6962	16.782	16.6103
ENSSSCG00000029553	CCDC57	NO	0.521742	13.8779	13.7592	11.6113	27.6249	18.5618	18.7585	11.2666	18.1051	16.6957	13.8294	19.5619
ENSSSCG00000037977	ALMS1	NO	0.528965	20.6053	5.78908	12.3957	17.4468	21.2921	21.6626	16.0829	18.1369	16.6764	17.594	15.7588
ENSSSCG00000024485	RUNDC3B	NO	0.373788	11.2906	7.82655	4.53451	42.2652	13.4503	12.2887	13.8045	27.8502	16.6638	10.77	22.5577
ENSSSCG00000010756	MGMT	NO	0.5168	10.5065	13.8332	7.38364	24.5778	19.8113	20.4673	13.8529	22.8478	16.66	12.8886	20.4315
ENSSSCG00000016692	TAX1BP1	NO	0.0183714	22.2452	5.24513	15.8095	20.2365	23.5564	14.0259	20.0184	12.1016	16.6548	20.4074	12.9023
ENSSSCG00000000587	AEBP2	NO	0.850485	10.8045	8.80864	6.7263	35.6384	21.5657	9.44705	15.3926	24.8265	16.6512	13.6223	19.6801
ENSSSCG00000007780	ZNF629	NO	0.604363	11.9248	9.04768	16.7847	28.1803	19.3693	21.3657	8.64787	17.8157	16.642	14.1817	19.1024
ENSSSCG00000035388	C16orf46	NO	0.587184	11.6516	9.05665	14.0739	25.2982	22.704	23.797	6.43776	20.0995	16.6398	13.7168	19.5628
ENSSSCG00000011405	HYAL2	NO	0.737721	11.7351	7.51075	14.4309	30.6473	22.0109	22.0293	9.4564	15.2926	16.6391	14.4083	18.87
ENSSSCG00000006468	HDGF	NO	0.807464	15.9234	6.72131	16.7656	41.5872	18.1195	15.7231	9.21926	9.05385	16.6391	15.0069	18.2714
ENSSSCG00000026744	ZDHHC20	NO	0.799155	12.073	5.6782	19.954	30.6311	16.5635	16.9239	12.9359	18.2478	16.6259	15.3816	17.8703
ENSSSCG00000024696	CCNYL1	NO	0.939045	16.7178	9.54919	16.8371	25.8764	13.5571	16.4032	13.2282	20.8085	16.6222	15.0851	18.1593
ENSSSCG00000007826	LCMT1	NO	0.996545	16.9182	6.93956	18.7693	35.6527	15.3145	13.0068	9.44488	16.8187	16.6081	15.1117	18.1044
ENSSSCG00000034521	NUDT21	NO	0.743701	27.2489	3.96091	7.10008	18.8716	12.5206	42.2354	7.37143	13.4695	16.5973	13.5603	19.6344
ENSSSCG00000009148	LEF1	NO	0.667375	11.5551	6.20566	14.5566	25.1916	15.1294	29.4876	11.4676	19.1626	16.5945	13.1772	20.0119
ENSSSCG00000007947	PAM16	NO	0.797504	11.4865	5.97808	12.1582	19.4821	19.7899	25.4855	9.62284	28.3555	16.5448	13.2644	19.8253
ENSSSCG00000005895	C8orf82	NO	0.787296	9.70345	10.5738	13.458	21.0395	22.9555	26.8153	10.0146	17.7951	16.5444	14.0329	19.0559
ENSSSCG00000021292	OSBPL9	NO	0.850485	15.6071	6.88885	11.3859	24.1858	17.0065	24.6224	13.3726	19.138	16.5259	14.343	18.7087
ENSSSCG00000017125	FOXK2	NO	0.392962	11.4275	7.93127	14.1422	27.669	18.0758	24.1507	9.19849	19.3712	16.4958	13.211	19.7805
ENSSSCG00000031636	FIP1L1	NO	0.458448	13.371	8.74202	14.2568	27.1591	12.6382	16.9339	13.0548	25.6682	16.478	13.3302	19.6258
ENSSSCG00000015534	ACBD6	NO	0.917677	15.1841	0.981167	11.0292	24.8814	19.3133	11.999	16.3216	31.9731	16.4604	15.462	17.4587
ENSSSCG00000007914	METTL22	NO	0.924082	10.6478	8.13927	15.3826	28.2866	22.1897	18.2706	11.4198	17.2232	16.4449	14.91	17.9799
ENSSSCG00000012884	PPP6R3	NO	0.972963	15.5214	6.58986	11.4379	32.4744	15.2948	11.7291	14.726	23.7773	16.4438	14.245	18.6426
ENSSSCG00000036614	PGP	NO	0.604363	6.8183	12.1554	8.29615	15.349	22.6155	27.8865	17.0992	21.1387	16.4199	13.7073	19.1324
ENSSSCG00000038766	MAD1L1	NO	0.64722	11.5259	10.8971	13.7082	21.0439	14.363	18.0591	16.7514	24.9998	16.4186	14.0871	18.75
ENSSSCG00000014051	TSPAN17	NO	0.521742	13.5493	13.1402	10.0452	22.1945	20.3651	19.4332	14.6142	17.9054	16.4059	14.6434	18.1683
ENSSSCG00000002259	AKAP13	NO	0.973473	9.17726	4.84986	16.534	27.5842	16.521	19.6471	16.1165	20.6817	16.389	14.5872	18.1907
ENSSSCG00000005914	SHARPIN	NO	0.384592	10.7474	10.7385	12.4898	23.5228	15.1179	24.394	11.9206	21.858	16.3486	12.5689	20.1283
ENSSSCG00000007713	BUD23	NO	0.9651	11.6826	3.01427	14.3834	22.9687	25.8089	23.2026	12.0391	17.49	16.3237	15.9785	16.6689
ENSSSCG00000029393	CENPJ	NO	0.746351	7.62305	4.15616	17.9105	37.1596	21.8924	22.92	6.74456	12.1559	16.3203	13.5426	19.0979
ENSSSCG00000002639		NO	0.641531	20.1083	18.2642	2.46428	1.71437	31.7922	1.35133	27.0874	27.7174	16.3124	20.363	12.2618
ENSSSCG00000007516	STX16-NPEPL1	NO	0.5577	2.83587	0	22.5213	2.58373	25.4869	30.3885	14.3086	32.3565	16.3102	16.2882	16.3322
ENSSSCG00000009751	FZD10	NO	0.929575	12.9703	9.65522	15.9024	20.4739	16.8857	12.7325	17.9469	23.6582	16.2781	15.9263	16.63
ENSSSCG00000038237	UQCC1	NO	0.754893	32.5502	21.6223	6.28563	9.97005	5.56847	7.3085	3.80749	43.0782	16.2739	12.053	20.4948
ENSSSCG00000013475	NCLN	NO	0.415041	8.00947	10.1237	16.2025	31.3251	18.397	20.2132	9.4924	16.4046	16.271	13.0253	19.5166
ENSSSCG00000003374	ESPN	NO	0.831708	7.8362	5.93582	12.6901	19.3359	27.2246	28.6894	11.808	16.634	16.2693	14.8897	17.6488
ENSSSCG00000034963	IQCH	NO	0.789938	15.3603	7.663	12.0062	26.8188	16.5417	16.2861	12.5648	22.7943	16.2544	14.1182	18.3905
ENSSSCG00000038323	ACTN3	NO	0.315895	10.908	7.81958	13.5388	30.1251	11.594	14.1662	14.8006	26.9787	16.2414	12.7103	19.7724
ENSSSCG00000025984	TTLL5	NO	0.863867	12.162	4.52752	11.6422	27.613	18.0406	18.4163	13.494	23.9501	16.2307	13.8347	18.6267
ENSSSCG00000009257	GK2	NO	0.964127	11.5949	3.69254	14.681	26.0629	15.9761	18.4899	12.8802	26.389	16.2208	13.7831	18.6586
ENSSSCG00000003385	PARK7	NO	0.604363	18.1213	6.75357	9.66609	21.9843	24.5682	10.7025	20.1556	17.8124	16.2205	18.1278	14.3132
ENSSSCG00000021136	TPD52L3	NO	0.844003	8.74087	4.81329	10.1813	18.2619	24.111	34.5061	9.24914	19.8418	16.2132	13.0706	19.3558
ENSSSCG00000017529	CBX1	NO	0.348554	13.6415	8.15527	9.3389	25.1171	17.3436	20.167	13.4443	22.4004	16.201	13.4421	18.9599
ENSSSCG00000029249	NAV3	NO	0.0930608	20.2903	12.1839	8.94521	27.9807	16.523	19.6193	6.13972	17.8531	16.1919	12.9746	19.4093
ENSSSCG00000012969	FIBP	NO	0.99841	14.4371	11.6409	13.0991	18.9464	18.2245	18.7126	16.9165	17.3389	16.1645	15.6693	16.6597
ENSSSCG00000010566	FBXW4	NO	0.724175	14.8762	7.41592	11.1904	26.9756	15.4037	16.141	12.4471	24.7034	16.1442	13.4793	18.809
ENSSSCG00000003844	TTC4	NO	0.949905	12.5023	2.81817	8.84116	24.6684	16.2174	20.3307	14.5862	29.1699	16.1418	13.0368	19.2468
ENSSSCG00000038494	LPIN2	NO	0.629916	12.684	7.1658	10.1043	20.6112	23.0989	22.599	8.78351	23.6522	16.0874	13.6677	18.507
ENSSSCG00000017645	TEX14	NO	0.352532	11.0654	7.79793	13.8536	31.5761	18.2761	20.528	8.74713	16.7613	16.0757	12.9856	19.1659
ENSSSCG00000008900	SRP72	NO	0.481505	13.3465	1.26915	14.644	27.3786	19.2867	21.3431	13.4417	17.8655	16.0719	15.1798	16.9641
ENSSSCG00000003506	PINK1	NO	0.648216	9.99823	4.25179	6.33291	28.2153	25.043	22.0995	9.49655	22.9334	16.0463	12.7177	19.375
ENSSSCG00000038950	VARS1	NO	0.7988	11.3779	6.35322	13.5743	23.819	20.8299	22.9996	10.2265	19.1108	16.0364	14.0021	18.0707
ENSSSCG00000006069	RGS22	NO	0.92278	15.4077	8.91394	11.6194	26.526	14.0307	13.406	10.0567	28.3202	16.0351	12.7786	19.2915
ENSSSCG00000034853		NO	0.545664	0	0	113.923	14.1514	0.095947	0.048765	0.021903	0	16.0301	28.5102	3.55005
ENSSSCG00000023612	LOC100515049	NO	0.385282	9.28687	5.33809	13.861	30.8608	18.4014	25.0684	7.37999	17.8472	16.0055	12.2323	19.7786
ENSSSCG00000012270	UBA1	NO	0.77013	12.4063	5.65717	16.519	26.0827	24.16	21.0251	10.1114	11.7577	15.9649	15.7992	16.1306
ENSSSCG00000014348	SPATA24	NO	0.978667	14.5727	6.92522	15.7597	23.7248	17.1045	18.3447	9.86177	21.319	15.9516	14.3247	17.5784
ENSSSCG00000008242	KCMF1	NO	0.779717	9.05411	5.4804	15.1839	27.7644	16.819	23.4021	12.4278	17.4096	15.9427	13.3712	18.5141
ENSSSCG00000023727	TRIM37	NO	0.713968	14.2878	7.19977	11.1428	26.537	15.6698	17.1829	13.0677	22.2977	15.9232	13.542	18.3043
ENSSSCG00000034927	LOC110260088	NO	0.789938	16.6996	5.66299	11.9605	23.1907	24.3956	21.6149	10.9712	12.8739	15.9212	16.0067	15.8356
ENSSSCG00000017826	SMG6	NO	0.773509	12.5619	6.10214	11.4225	26.0311	19.7149	18.1532	10.7784	22.5617	15.9157	13.6194	18.212
ENSSSCG00000037424	CDK19	NO	0.219428	11.5746	8.42414	10.866	23.0652	13.439	18.258	14.4334	27.2635	15.9155	12.5783	19.2527
ENSSSCG00000014578	DENND5A	NO	0.77013	10.2417	7.24431	14.5552	24.5647	20.0045	23.3712	10.6519	16.6735	15.9134	13.8633	17.9634
ENSSSCG00000000982	TTLL8	NO	0.544331	6.74711	7.09225	11.6072	33.5539	21.0239	19.8596	9.26452	18.0938	15.9053	12.1607	19.6499
ENSSSCG00000014044	NSD1	NO	0.582003	12.4798	9.46032	17.4722	32.1225	6.96556	8.70706	15.5023	24.1001	15.8512	13.105	18.5975
ENSSSCG00000025194	ZSWIM6	NO	0.827786	12.8824	6.07027	12.2491	26.232	18.4027	18.5687	11.5429	20.693	15.8301	13.7693	17.891
ENSSSCG00000018069	ND2	NO	0.610888	0	0	0	107.89	0	0	0	18.3479	15.7798	0	31.5595
ENSSSCG00000002654	FBXO31	NO	0.425534	11.0627	7.09939	13.2005	31.6728	16.8796	18.0271	8.60053	19.6331	15.772	12.4358	19.1081
ENSSSCG00000021845	ATXN2L	NO	0.711915	14.6813	7.35176	11.2026	26.4168	16.3036	16.1258	11.8642	22.162	15.7635	13.5129	18.0141
ENSSSCG00000000994	GMDS	NO	0.711742	8.70764	4.81575	10.6421	23.3901	21.1763	21.5735	12.7566	22.9138	15.747	13.3207	18.1733
ENSSSCG00000033228	SPAG9	NO	0.494906	15.5814	6.25112	13.7154	20.7046	15.8268	14.2475	21.3055	18.2009	15.7292	16.6073	14.851
ENSSSCG00000011380	C3orf84	NO	0.770486	10.4437	4.82366	10.4148	32.596	20.1796	23.784	8.45834	15.1224	15.7278	12.3741	19.0815
ENSSSCG00000029443	TKTL1	NO	0.892601	11.7645	9.08417	12.9482	22.921	23.0988	17.9203	9.96131	17.9473	15.7057	14.4432	16.9682
ENSSSCG00000027613	TRDN	NO	0.872436	7.29707	14.7715	9.70121	17.1954	9.96713	42.1748	7.91442	16.267	15.6611	8.71996	22.6022
ENSSSCG00000021821	MYO1C	NO	0.668791	11.7722	12.9791	10.4745	28.7386	7.69217	14.7964	22.6033	15.9247	15.6226	13.1355	18.1097
ENSSSCG00000031775	YAF2	NO	0.885386	14.1301	5.69712	8.56642	20.3536	16.8219	17.486	15.5437	26.3623	15.6201	13.7655	17.4748
ENSSSCG00000022830	KANSL1L	NO	0.108619	23.0473	5.83044	15.9277	16.51	22.6509	19.3351	12.3163	9.32922	15.6184	18.4856	12.7512
ENSSSCG00000005021	SAV1	NO	0.949713	8.04297	4.35329	14.1241	28.8741	13.7001	25.784	9.98869	19.9851	15.6065	11.464	19.7491
ENSSSCG00000028033	SECISBP2	NO	0.580048	12.9728	6.75208	7.55262	22.3064	16.8657	18.7563	13.9443	25.6735	15.603	12.8339	18.3721
ENSSSCG00000008640	IAH1	NO	0.776556	17.9257	4.93426	24.4379	9.28226	20.1139	31.0048	4.25476	12.8697	15.6029	16.6831	14.5228
ENSSSCG00000013884	MAP1S	NO	0.957185	11.0143	6.91387	15.3306	20.5518	24.9632	16.5962	10.0752	19.3435	15.5986	15.3458	15.8514
ENSSSCG00000002646	TRAPPC2L	NO	0.703685	7.15486	7.92452	11.1561	40.8077	12.5092	14.3215	11.7669	18.9166	15.5697	10.6468	20.4926
ENSSSCG00000011332	SETD2	NO	0.949713	13.1159	5.51666	13.356	22.5016	19.8957	21.8554	12.0405	16.1771	15.5574	14.6021	16.5127
ENSSSCG00000026367	IFT172	NO	0.883093	15.0406	9.78484	9.0126	13.17	17.4211	16.3195	20.7242	22.6616	15.5168	15.5496	15.484
ENSSSCG00000038153	PACRG	NO	0.552191	2.66999	13.5591	16.843	32.4124	17.5015	18.5804	2.17534	20.3494	15.5114	9.79746	21.2253
ENSSSCG00000011258	EXOG	NO	0.885893	19.6287	7.83371	10.8884	23.0114	14.7114	14.9506	9.24607	23.4713	15.4677	13.6186	17.3168
ENSSSCG00000012916	POLD4	NO	0.758021	8.01395	4.0919	13.6291	26.3099	18.4399	21.1356	10.3513	21.5079	15.4349	12.6086	18.2613
ENSSSCG00000010872	AKT3	NO	0.80862	12.7694	4.34751	12.4378	16.1265	34.6252	17.1828	9.88197	15.9999	15.4214	17.4286	13.4142
ENSSSCG00000010971	ARID3C	NO	0.489424	7.64687	7.05246	13.4352	25.7873	16.5072	19.6374	9.74416	23.4897	15.4125	11.8334	18.9917
ENSSSCG00000000433	B4GALNT1	NO	0.469785	12.6549	7.75073	10.9193	22.701	19.0048	22.8128	7.32694	20.1289	15.4124	12.4765	18.3484
ENSSSCG00000015074	SIDT2	NO	0.595498	8.25836	4.54091	11.0248	32.0232	21.4138	17.7728	6.81027	21.1827	15.3784	11.8768	18.8799
ENSSSCG00000017935	CTDNEP1	NO	0.814178	10.6314	5.62021	14.1363	25.7056	24.8523	23.8823	4.94123	12.9178	15.3359	13.6403	17.0315
ENSSSCG00000010384	LRRC18	NO	0.913049	7.80179	4.69973	18.4875	34.2309	18.5839	18.5668	7.90159	12.2384	15.3138	13.1937	17.4339
ENSSSCG00000014828	RAB6A	NO	0.865973	29.8644	7.0729	9.38919	17.3902	9.70969	12.7096	16.7471	19.5919	15.3094	16.4276	14.1911
ENSSSCG00000000204	PRPF40B	NO	0.972605	5.61803	2.59082	9.24225	15.5963	26.3405	25.5731	13.5463	23.8735	15.2976	13.6868	16.9084
ENSSSCG00000012939	BRMS1	NO	0.700009	8.86755	8.50638	11.3842	19.2154	23.6808	19.8751	11.2505	19.4509	15.2789	13.7958	16.762
ENSSSCG00000046003	TSC1	NO	0.922867	10.7962	7.8907	14.1734	28.9277	19.3502	17.1557	9.42002	14.3229	15.2546	13.435	17.0743
ENSSSCG00000021702	XRRA1	NO	0.831708	10.8636	4.92373	11.4151	24.5312	19.8549	20.6524	8.33299	21.2719	15.2307	12.6167	17.8448
ENSSSCG00000032330	THY1	NO	0.627162	6.83073	13.8624	32.6509	23.8368	12.3005	14.3029	9.95595	8.07415	15.2268	15.4345	15.0191
ENSSSCG00000012952	TMEM151A	NO	0.739168	6.31356	6.55898	15.8282	27.4854	17.1695	18.6298	11.8597	17.8622	15.2134	12.7928	17.6341
ENSSSCG00000024563	CEP83	NO	0.674437	14.9015	8.61213	18.0015	17.1641	18.6754	14.322	14.443	15.291	15.1764	16.5054	13.8473
ENSSSCG00000024263	SERF2	NO	0.794301	17.2208	5.22614	9.78566	3.19258	25.6215	24.5938	9.34168	26.2184	15.1501	15.4924	14.8077
ENSSSCG00000007514	VAPB	NO	0.830302	19.2472	5.55088	7.99501	16.509	13.9472	16.4753	14.5356	26.9285	15.1486	13.9313	16.3659
ENSSSCG00000035119	MTMR6	NO	0.452582	10.1493	5.94075	9.4692	25.7196	20.4138	19.9351	8.17639	21.3711	15.1469	12.0522	18.2416
ENSSSCG00000025653	THOC1	NO	0.534779	16.7573	8.27872	10.5229	21.4004	12.6547	17.9588	9.3791	23.9639	15.1145	12.3285	17.9005
ENSSSCG00000017936	GABARAP	NO	0.762252	15.6413	12.6682	0	3.07943	31.6219	7.76018	45.4854	4.61195	15.1086	23.1872	7.02995
ENSSSCG00000000964	LMF2	NO	0.44124	9.78141	6.73052	12.2687	27.8572	20.1733	20.6738	6.31498	16.949	15.0936	12.1346	18.0526
ENSSSCG00000014321	KLHL3	NO	0.0769162	13.4912	9.73821	9.456	24.7523	14.298	16.7153	8.21027	24.0656	15.0909	11.3639	18.8179
ENSSSCG00000016758	STK17A	NO	0.985984	12.2967	6.42026	14.5512	19.7173	20.4123	17.7311	9.32917	19.8656	15.0404	14.1473	15.9335
ENSSSCG00000034522	TRIP13	NO	0.806075	10.5926	8.44289	12.1131	23.89	21.2406	19.7577	9.5508	14.7262	15.0392	13.3743	16.7042
ENSSSCG00000005310	TESK1	NO	0.591746	11.5171	7.77874	12.5479	27.8839	19.4058	19.8926	6.9211	14.2872	15.0293	12.598	17.4606
ENSSSCG00000048802	LOC100525054	NO	0.933411	9.93197	16.9966	21.97	14.5805	12.8438	17.2295	11.1438	15.3561	15.0065	13.9724	16.0407
ENSSSCG00000016747	NUDCD3	NO	0.883507	10.2146	7.15627	14.6151	13.1431	14.6043	27.0403	8.85795	24.2494	14.9851	12.073	17.8973
ENSSSCG00000016737	PPIA	NO	0.0196128	15.2385	3.53622	13.7892	8.50242	19.4587	6.9594	45.2629	7.0626	14.9762	23.4373	6.51516
ENSSSCG00000011230	OSBPL10	NO	0.423597	11.2435	6.68516	9.30051	27.4962	11.1159	24.2574	11.7471	17.847	14.9616	10.8518	19.0714
ENSSSCG00000002285	GPHN	NO	0.448089	8.08782	6.38218	8.55711	24.6709	27.4094	21.8426	8.99646	13.5992	14.9432	13.2627	16.6237
ENSSSCG00000038858	CFAP61	NO	0.272894	7.98075	4.91437	13.4568	31.835	15.2673	17.837	8.48692	19.6383	14.9271	11.298	18.5562
ENSSSCG00000003554	SELENON	NO	0.610888	6.87609	4.76568	10.279	19.8909	21.2935	21.0747	10.345	24.6569	14.8977	12.1984	17.597
ENSSSCG00000022358	RAB28	NO	0.68383	10.0753	7.16993	10.7717	20.5732	16.5313	17.8886	12.8398	23.331	14.8976	12.5545	17.2407
ENSSSCG00000017140	CHMP6	NO	0.95087	7.99579	4.47852	7.74576	11.6101	37.5623	30.2766	5.43887	13.9682	14.8845	14.6857	15.0833
ENSSSCG00000013177	MED19	NO	0.9553	10.0322	13.3531	12.4094	17.038	14.5073	13.814	19.3134	18.59	14.8822	14.0656	15.6988
ENSSSCG00000016743	OGDH	NO	0.581046	10.175	6.30291	11.9058	27.8625	20.1569	18.0219	6.9246	17.595	14.8681	12.2906	17.4456
ENSSSCG00000010196	ZNF25	NO	0.809507	12.6815	3.57501	14.7017	23.683	18.0422	22.591	9.16087	14.4095	14.8556	13.6466	16.0646
ENSSSCG00000008976	ART3	NO	0.939045	10.2446	5.23365	5.35025	15.2702	23.4184	13.6962	22.4756	23.0918	14.8476	15.3722	14.3229
ENSSSCG00000008336	ANXA4	NO	0.634318	9.49389	5.80305	10.3571	23.4659	17.4937	17.4028	11.2648	23.2984	14.8224	12.1524	17.4925
ENSSSCG00000004610	CCPG1	NO	0.0646899	17.5911	2.35555	14.5736	18.4528	19.9004	17.3471	11.0845	17.093	14.7998	15.7874	13.8121
ENSSSCG00000008111	NPHP1	NO	0.985659	14.8643	6.8518	13.4982	22.3415	17.3329	14.2511	9.93535	18.7875	14.7328	13.9077	15.558
ENSSSCG00000016217	DNAJB2	NO	0.81165	7.72961	4.89694	10.3182	32.3884	18.648	21.7229	9.71318	12.3718	14.7236	11.6022	17.845
ENSSSCG00000004830	ATP10A	NO	0.461847	9.4439	6.8873	10.5818	20.9284	22.141	23.0806	7.23761	17.4786	14.7224	12.3511	17.0937
ENSSSCG00000022842		NO	0.00756784	12.0156	2.625	13.9082	7.90093	29.3665	15.5807	23.8929	12.4744	14.7205	19.7958	9.64526
ENSSSCG00000018039		NO	0.787296	8.32531	8.19988	12.9475	18.6016	20.6607	24.2787	9.69739	15.0463	14.7197	12.9077	16.5316
ENSSSCG00000009851	PEBP1	NO	0.594455	10.1756	2.14366	10.7968	23.2341	23.3795	16.5843	17.3271	14.0016	14.7053	15.4198	13.9909
ENSSSCG00000017890	PITPNM3	NO	0.673754	9.31109	3.42717	12.225	19.3017	25.1818	18.235	12.1766	17.7409	14.6999	14.7236	14.6762
ENSSSCG00000003172	KASH5	NO	0.960159	11.4795	4.46979	9.99621	29.5394	14.6874	15.3437	13.5987	18.168	14.6603	12.4405	16.8802
ENSSSCG00000002850		NO	0.588225	22.0159	15.0018	13.5179	5.59603	6.69853	6.11739	33.9696	14.295	14.6515	19.0505	10.2526
ENSSSCG00000027127	MAP2K2	NO	0.872436	11.3001	6.47464	8.13665	26.5953	18.9937	16.0201	11.9086	17.7033	14.6415	12.5848	16.6983
ENSSSCG00000040457	EPN2	NO	0.742095	10.7958	8.05895	18.2149	23.6977	8.67352	16.4567	12.054	19.1058	14.6322	12.4346	16.8298
ENSSSCG00000039233	CCDC27	NO	0.687941	10.5674	5.69522	8.95987	18.1065	18.7145	19.519	10.5963	24.7468	14.6132	12.2095	17.0169
ENSSSCG00000005286	CEP78	NO	0.686307	8.00806	5.37507	7.1737	25.263	19.6946	15.8172	12.1721	23.2032	14.5884	11.7621	17.4146
ENSSSCG00000015660	PFKFB2	NO	0.305686	4.8801	4.12202	16.3426	32.1062	10.7429	15.9891	11.1218	21.4017	14.5883	10.7719	18.4047
ENSSSCG00000008147	FHL2	NO	0.225939	14.813	5.59653	7.03312	22.592	26.6074	14.0611	10.7659	14.9423	14.5514	14.8048	14.298
ENSSSCG00000032960	MANEAL	NO	0.818928	6.4642	4.03912	11.554	23.6963	24.6095	20.5539	8.49939	16.9805	14.5496	12.7818	16.3175
ENSSSCG00000000057		NO	0.983003	7.18918	1.29584	13.517	34.0422	21.3509	17.4314	5.62751	15.9406	14.5493	11.9211	17.1775
ENSSSCG00000033305	PGBD2	NO	0.822888	11.8189	6.66733	11.07	24.9494	19.7595	18.5521	8.46329	15.0188	14.5374	12.7779	16.2969
ENSSSCG00000034364	SPECC1	NO	0.645723	12.4154	7.61744	11.2107	18.8847	15.7054	20.0619	9.46767	20.9268	14.5363	12.1998	16.8727
ENSSSCG00000006037	OXR1	NO	0.641812	11.1037	6.22674	15.2537	20.0431	21.4107	16.6728	12.5928	12.8862	14.5237	15.0902	13.9572
ENSSSCG00000040887	HEATR3	NO	0.46432	11.7238	10.5403	11.791	21.8626	12.7649	19.2779	12.3029	15.6528	14.4895	12.1456	16.8334
ENSSSCG00000028613	CETN1	NO	0.964127	18.3279	12.2212	12.7145	20.6009	15.6604	14.9889	8.28644	13.0884	14.4861	13.7473	15.2248
ENSSSCG00000003757	SSX2IP	NO	0.338381	17.6308	5.79805	9.87072	21.4278	19.3015	21.7208	11.3896	8.61667	14.4695	14.5482	14.3908
ENSSSCG00000017213	JPT1	NO	0.790753	15.0694	5.55828	12.8801	13.1729	23.6212	18.6637	9.54539	17.0075	14.4398	15.279	13.6006
ENSSSCG00000007798	TBC1D10B	NO	0.9265	10.0405	6.68134	19.2459	22.5953	17.8212	12.4278	9.48308	16.7026	14.3747	14.1477	14.6018
ENSSSCG00000011417	DCAF1	NO	0.901354	11.2203	4.05908	13.2181	22.6223	18.138	15.095	11.9704	18.66	14.3729	13.6367	15.1091
ENSSSCG00000010086	LOC100154312	NO	0.526778	9.27958	5.39228	11.5946	32.4514	18.0723	19.3597	6.49376	12.1115	14.3444	11.3601	17.3287
ENSSSCG00000011325	MYL3	NO	0.720008	8.02059	4.66954	12.6011	29.3603	16.7877	15.2926	7.69214	20.2464	14.3338	11.2754	17.3922
ENSSSCG00000014101	AP3B1	NO	0.36883	9.47913	5.65909	18.5632	18.712	16.7244	11.8998	15.8453	17.738	14.3276	15.153	13.5022
ENSSSCG00000026793	B4GALT2	NO	0.56725	9.82064	9.52347	9.95309	16.9785	15.9117	20.7735	11.2288	20.3566	14.3183	11.7286	16.908
ENSSSCG00000034101	D2HGDH	NO	0.905558	3.19123	1.04914	7.87838	30.527	25.7916	23.7125	7.34941	14.9956	14.3119	11.0527	17.5711
ENSSSCG00000001646	BICRAL	NO	0.375709	8.73287	5.23107	14.6036	31.6067	13.832	15.7686	7.98758	16.5414	14.288	11.289	17.2869
ENSSSCG00000003630	AGO1	NO	0.580718	8.9019	5.07883	16.7926	36.5605	12.0855	12.7919	7.2096	14.8774	14.2873	11.2474	17.3272
ENSSSCG00000004813	TTC23	NO	0.766765	12.4822	5.85944	11.0026	22.0916	14.4663	16.5387	11.1884	20.6038	14.2791	12.2849	16.2734
ENSSSCG00000045290		NO	0.68383	7.99004	6.7186	14.1503	23.153	22.7545	18.3758	4.39261	16.5783	14.2641	12.3219	16.2064
ENSSSCG00000015944	TLK1	NO	0.939045	13.0944	6.17656	12.081	22.6846	14.1124	13.5922	16.2473	16.0951	14.2605	13.8838	14.6371
ENSSSCG00000009021	LRBA	NO	0.795647	12.8023	6.78828	9.64134	30.3735	11.981	15.2866	13.7836	13.3947	14.2564	12.052	16.4608
ENSSSCG00000003256	PRKCG	NO	0.976262	7.64963	5.90081	18.2092	22.4257	19.5354	17.7996	9.61459	12.8517	14.2483	13.7522	14.7445
ENSSSCG00000039712	LOC100739557	NO	0.945608	9.04736	10.6489	11.0865	19.3946	13.9494	7.59755	15.3973	26.7376	14.2324	12.3701	16.0947
ENSSSCG00000006066	RNF19A	NO	0.705907	16.0576	5.85136	14.2744	19.0176	18.2854	15.2801	9.81968	15.1719	14.2198	14.6093	13.8303
ENSSSCG00000007786	RNF40	NO	0.828564	9.05471	4.7469	12.5462	21.8143	23.354	18.3207	10.9748	12.8474	14.2074	13.9824	14.4323
ENSSSCG00000016695	HIBADH	NO	0.971734	6.37997	1.37062	14.7384	23.1487	20.1978	22.711	11.3574	13.7354	14.2049	13.1684	15.2414
ENSSSCG00000040153		NO	0.949713	8.84989	7.68684	21.8887	23.9314	14.0478	16.8168	11.0134	9.35553	14.1988	13.95	14.4476
ENSSSCG00000000366	DNAJC14	NO	0.293911	8.03656	9.20248	11.4107	18.2695	12.504	16.1046	10.1586	27.8886	14.1969	10.5275	17.8663
ENSSSCG00000009779	MPHOSPH9	NO	0.875018	13.2355	4.07571	11.6517	18.6422	17.5075	18.2579	11.7494	18.4506	14.1963	13.536	14.8566
ENSSSCG00000006277	SPIDR	NO	0.636608	14.3369	7.00689	9.16251	20.9829	14.3567	15.5966	9.10158	22.9388	14.1854	11.7394	16.6313
ENSSSCG00000000037	ARFGAP3	NO	0.814178	18.6884	2.79957	12.2131	21.4042	21.6454	19.6455	8.69101	8.34309	14.1788	15.3095	13.0481
ENSSSCG00000015329	PPP1R9A	NO	0.388703	10.5993	4.02943	20.0251	17.8519	19.99	16.3287	10.047	13.8407	14.089	15.1654	13.0127
ENSSSCG00000024268		NO	0.816304	9.41123	6.27555	11.2351	26.1252	20.4571	18.226	7.1248	13.8192	14.0843	12.0571	16.1115
ENSSSCG00000005915		NO	0.590091	24.0557	21.2585	13.4341	7.71043	16.3854	11.571	14.9995	3.20818	14.0778	17.2187	10.937
ENSSSCG00000009714	NEK1	NO	0.949713	12.7738	6.18939	12.6183	20.7656	13.2922	14.1965	11.759	21.0253	14.0775	12.6108	15.5442
ENSSSCG00000009523	GGACT	NO	0.99841	10.9271	10.1772	12.4267	19.27	17.4074	17.4138	11.6268	13.3665	14.0769	13.097	15.0569
ENSSSCG00000001619	FOXP4	NO	0.690614	9.63916	6.20625	14.3755	23.7137	15.1943	15.6905	8.45517	19.3027	14.0722	11.916	16.2283
ENSSSCG00000033490		NO	0.597989	16.2161	4.30298	19.5673	18.1004	17.3697	18.0312	10.5906	8.22279	14.0501	15.9359	12.1643
ENSSSCG00000006508	ASH1L	NO	0.996714	11.2432	5.4396	11.0413	20.4253	18.476	18.2002	11.5702	15.9711	14.0458	13.0827	15.009
ENSSSCG00000010768	CFAP46	NO	0.75282	9.24283	7.63505	12.3595	21.9186	18.1867	18.5531	9.11705	15.2125	14.0282	12.2265	15.8298
ENSSSCG00000022187	CISD3	NO	0.966212	10.2215	6.22778	10.5823	37.7413	16.6349	14.3422	7.68571	8.77128	14.0259	11.2811	16.7706
ENSSSCG00000009556	CUL4A	NO	0.937664	6.85278	2.93513	8.38044	20.592	20.6441	23.4746	10.3688	18.9296	14.0222	11.5615	16.4828
ENSSSCG00000033292	C1orf194	NO	0.721818	10.9201	4.71297	14.2113	30.9599	9.1571	14.8244	7.44377	19.7565	13.9983	10.4331	17.5634
ENSSSCG00000002923	WDR62	NO	0.622507	9.52054	7.6882	8.33361	18.0705	23.9562	19.0505	7.44527	17.9123	13.9971	12.3139	15.6804
ENSSSCG00000007001		NO	0.9061	9.67154	3.78511	16.1011	21.2717	13.7457	16.8239	9.83222	20.7019	13.9917	12.3377	15.6456
ENSSSCG00000020823	BSCL2	NO	0.949831	8.50062	6.39965	11.0532	21.7551	16.7775	19.4222	13.0862	14.7475	13.9677	12.3544	15.5811
ENSSSCG00000002426	ZC3H14	NO	0.942786	10.4554	2.97671	12.5097	23.3854	12.9931	18.4212	10.8564	19.7845	13.9228	11.7036	16.1419
ENSSSCG00000001513	SYNGAP1	NO	0.779883	9.22842	5.5875	12.0876	23.4174	16.9359	18.9089	8.79677	16.3631	13.9157	11.7622	16.0692
ENSSSCG00000033627	YIPF3	NO	0.514585	6.56934	3.66797	10.6323	28.8034	20.7161	22.3063	4.39738	14.1921	13.9106	10.5788	17.2424
ENSSSCG00000033259	ARMH1	NO	0.236468	7.71002	6.11673	4.4034	26.92	27.785	10.9695	3.90535	23.2382	13.881	10.9509	16.8111
ENSSSCG00000008701	LRPAP1	NO	0.809507	10.0753	8.37244	8.53523	15.0002	21.4917	21.2634	10.7536	15.5077	13.875	12.714	15.036
ENSSSCG00000024197	USP48	NO	0.272622	10.0121	6.56225	9.52873	23.7081	14.1066	17.8519	10.1922	18.9096	13.8589	10.9599	16.758
ENSSSCG00000009713	CLCN3	NO	0.973224	8.22508	3.22415	9.06265	15.336	15.5431	16.1372	16.7104	26.5354	13.8468	12.3853	15.3082
ENSSSCG00000008287	INO80B	NO	0.728202	10.2141	6.78481	12.7731	21.3468	14.7618	19.8949	7.92054	17.0666	13.8453	11.4174	16.2733
ENSSSCG00000027190	TUBA8	NO	0.932012	19.0214	3.17878	10.7524	23.4902	16.063	16.5816	8.00826	13.5856	13.8352	13.4613	14.2091
ENSSSCG00000037617	ZBTB39	NO	0.199062	11.8831	8.81662	12.1096	31.0836	10.8693	13.7934	6.04705	16.0575	13.8325	10.2273	17.4378
ENSSSCG00000003653	NDUFS5	NO	0.782717	15.6211	6.02428	9.15736	18.6963	17.4249	11.7338	16.6442	15.2184	13.815	14.7119	12.9182
ENSSSCG00000037920	TRIM28	NO	0.789938	7.98193	2.75292	5.9277	21.9086	21.2676	21.2419	10.015	19.1946	13.7863	11.2981	16.2745
ENSSSCG00000007716	TMEM270	NO	0.666178	9.58849	8.96367	9.50186	17.6097	16.4218	17.3865	11.0793	19.4699	13.7526	11.6478	15.8574
ENSSSCG00000003119	ZNF541	NO	0.47805	9.28275	5.95019	10.8901	22.7631	17.4975	21.2146	7.81689	14.5307	13.7432	11.3718	16.1146
ENSSSCG00000007383	TOMM34	NO	0.335568	5.98871	6.70952	8.80116	18.5063	21.6784	24.26	6.36651	17.5725	13.7354	10.7087	16.7621
ENSSSCG00000039259	LOC110255209	NO	0.640421	9.89525	18.8538	6.13203	12.4472	12.4831	15.8869	16.4422	17.7098	13.7313	11.2381	16.2244
ENSSSCG00000011668	TRIM42	NO	0.5168	9.49457	5.51777	10.5962	26.4319	14.8724	15.8986	7.97172	18.8991	13.7103	10.7337	16.6869
ENSSSCG00000038646	ENAH	NO	0.0923817	12.5166	5.33841	19.8595	16.656	18.0201	12.5874	13.5992	11.0937	13.7089	15.9988	11.4189
ENSSSCG00000014291	AFF4	NO	0.643906	13.9716	5.74303	12.3892	19.3365	17.3954	15.8116	13.3095	11.5028	13.6825	14.2664	13.0985
ENSSSCG00000021467	EME2	NO	0.12397	6.19677	4.13188	8.83521	29.6734	20.2614	22.0042	4.42522	13.9186	13.6808	9.92965	17.432
ENSSSCG00000016827	TTC23L; BRIX1	NO	0.81107	4.18566	1.90501	11.7732	27.1348	22.3006	19.0736	6.82286	16.2228	13.6773	11.2706	16.0841
ENSSSCG00000007437	SLC12A5	NO	0.941006	9.50087	5.73269	10.839	20.7409	20.9159	16.6665	9.54702	15.4705	13.6767	12.7007	14.6527
ENSSSCG00000031800	CEP72	NO	0.93993	12.4556	8.96919	11.3726	15.0323	18.193	17.8366	9.56795	15.9697	13.6746	12.8973	14.4519
ENSSSCG00000040690	LRRC61; ZBED6CL	NO	0.880108	11.2244	10.6903	12.553	19.1152	17.9152	16.5715	8.36208	12.9524	13.673	12.5137	14.8324
ENSSSCG00000040461	CDKN1C	NO	0.824854	7.35118	13.194	16.7434	7.20163	21.4613	21.03	14.1282	8.04866	13.6448	14.921	12.3686
ENSSSCG00000007955	CLUAP1	NO	0.239585	10.65	6.23681	8.66936	21.4982	13.2027	16.4101	9.96472	22.4859	13.6397	10.6217	16.6577
ENSSSCG00000038735	SNAP23	NO	0.988983	6.28369	1.92317	7.73263	17.1852	9.82375	40.4919	10.1636	15.4754	13.6349	8.50091	18.7689
ENSSSCG00000016988	ERGIC1	NO	0.80146	10.9066	7.13366	11.5881	17.5352	14.65	21.8683	10.664	14.6357	13.6227	11.9522	15.2932
ENSSSCG00000016291	GIGYF2	NO	0.673754	10.8289	4.72499	14.3861	20.8321	16.56	12.4705	12.4666	16.6618	13.6164	13.5604	13.6724
ENSSSCG00000017937	PHF23	NO	0.836175	10.8738	3.59144	11.3464	19.5031	18.614	16.4669	11.7622	16.618	13.597	13.1491	14.0449
ENSSSCG00000027063	DPY19L1	NO	0.850818	9.58794	5.80928	9.79486	21.3725	20.1223	19.6232	8.47557	13.9107	13.587	11.9952	15.1789
ENSSSCG00000006726		NO	0.887439	5.41581	2.73452	9.95229	19.2214	19.1509	22.7412	11.7927	17.6136	13.5778	11.5779	15.5777
ENSSSCG00000022774	NOP53	NO	0.994426	9.70129	7.18308	5.74377	14.2002	18.8308	15.1368	19.5516	18.2085	13.5695	13.4569	13.6821
ENSSSCG00000004624	MAPK6	NO	0.253962	19.387	3.0416	12.0312	14.7902	23.7398	13.6158	9.51648	12.1864	13.5386	16.1686	10.9085
ENSSSCG00000039681	B9D1	NO	0.487131	3.51557	6.21377	9.14343	17.0906	18.5081	24.5861	14.1463	15.086	13.5362	11.3283	15.7441
ENSSSCG00000029519	CIAPIN1	NO	0.611027	8.9763	6.1135	8.04472	25.7576	18.1744	19.3049	7.63339	14.2022	13.5259	10.7072	16.3445
ENSSSCG00000023408	SAMD4A	NO	0.561141	6.87519	4.87218	13.3624	22.4996	17.5027	23.5294	6.57017	12.9287	13.5176	11.0776	15.9575
ENSSSCG00000008195	COX5B	NO	0.957028	8.83317	3.89539	9.94954	21.4253	15.9966	20.2915	12.5362	15.2111	13.5174	11.8289	15.2058
ENSSSCG00000007544	SUN1	NO	0.671946	9.77531	10.8648	8.20227	14.5029	15.7564	16.9505	13.2024	18.7684	13.5029	11.7341	15.2716
ENSSSCG00000003051	CD177	NO	0.30752	7.54236	5.72381	6.37047	16.5485	23.2399	28.8612	4.47369	15.2058	13.4957	10.4066	16.5848
ENSSSCG00000011619	EEFSEC	NO	0.562886	11.5145	7.9969	10.7112	19.5058	12.4978	21.8356	6.34323	17.5484	13.4942	10.2667	16.7217
ENSSSCG00000017362	ATXN7L3	NO	0.66003	9.6358	5.63379	12.64	27.5867	15.8049	16.0294	6.76735	13.8411	13.4924	11.212	15.7728
ENSSSCG00000010148	ERO1B	NO	0.728202	10.5567	5.64416	7.85724	18.1687	16.0919	15.1618	11.678	22.7743	13.4916	11.546	15.4372
ENSSSCG00000018026	CDRT1	NO	0.633	1.21892	0.84727	0.994528	32.6684	17.0518	23.0249	13.3431	18.6526	13.4752	8.15209	18.7983
ENSSSCG00000008209	TEX37	NO	0.960159	7.59948	4.05573	12.3265	24.5784	18.9052	15.8389	9.01209	15.4453	13.4702	11.9608	14.9796
ENSSSCG00000030328	NDUFB10	NO	0.830071	9.65905	6.61409	12.3491	10.1373	15.1772	15.7895	19.1631	18.7693	13.4573	14.0871	12.8276
ENSSSCG00000026964	STK36	NO	0.703705	7.89834	4.4285	12.196	26.209	17.149	16.4192	7.69957	15.5724	13.4465	11.2357	15.6572
ENSSSCG00000000274	PCBP2	NO	0.00385335	16.1642	2.62534	10.1717	11.7366	20.3004	9.7765	28.5552	8.15493	13.4356	18.7979	8.07335
ENSSSCG00000007904	TEKT5	NO	0.754893	6.60383	3.27183	12.0336	23.7123	15.9675	17.0885	7.89181	20.8348	13.4255	10.6242	16.2269
ENSSSCG00000048341		NO	0.965654	0	0	90.6471	16.6997	0	0	0	0	13.4184	22.6618	4.17493
ENSSSCG00000000195	PRPH	NO	0.933256	16.1761	9.32475	7.78028	15.8095	17.7557	13.0255	9.66874	17.7379	13.4098	12.8452	13.9744
ENSSSCG00000030546	HSD11B1L	NO	0.917268	9.00525	5.29353	10.7387	18.2902	17.9772	19.3382	15.024	11.5342	13.4002	13.1863	13.614
ENSSSCG00000021173	BSPRY	NO	0.976514	5.84715	3.01315	6.29152	12.0413	33.086	26.4109	8.16201	11.9476	13.3499	13.3467	13.3532
ENSSSCG00000017476	MSL1	NO	0.970887	7.45147	10.1268	16.3677	20.2975	15.4211	14.6495	13.3421	9.04683	13.3379	13.1456	13.5301
ENSSSCG00000042436		NO	0.99841	0	0	91.5052	15.0732	0	0	0	0.078701	13.3321	22.8763	3.78797
ENSSSCG00000025839	SUGP2	NO	0.970043	13.6892	5.70168	12.6492	15.2501	15.6889	17.0118	9.47338	17.1916	13.332	12.8752	13.7888
ENSSSCG00000000755	ERC1	NO	0.92489	11.8503	5.45269	12.8775	19.6768	13.0915	14.4336	11.8983	17.221	13.3127	12.4294	14.196
ENSSSCG00000008026	CRAMP1	NO	0.705091	12.8803	12.9298	9.69029	15.1451	12.7925	15.6417	11.4503	15.9553	13.3107	11.7033	14.918
ENSSSCG00000021644	BRD7	NO	0.93458	14.0556	6.18195	10.2987	20.4435	13.4776	14.4395	10.3343	16.9817	13.2766	12.0415	14.5117
ENSSSCG00000015428	PUS7	NO	0.595201	12.6768	7.07124	6.73829	12.3152	13.3341	17.172	10.8076	26.0965	13.2765	10.8892	15.6637
ENSSSCG00000026465	BABAM2	NO	0.978906	8.02502	1.56405	9.90651	22.7481	14.2585	19.0159	9.26624	21.3565	13.2676	10.3641	16.1711
ENSSSCG00000035949	FTO	NO	0.135696	12.8731	8.09864	7.67495	25.9211	10.9227	16.8646	7.21621	16.2624	13.2292	9.67175	16.7867
ENSSSCG00000023409	TIA1	NO	0.854537	14.3388	9.18314	19.3291	9.3618	10.9991	11.3718	8.28633	22.9623	13.229	13.2383	13.2197
ENSSSCG00000036711	UBE2D2	NO	0.739442	8.02124	4.83401	12.5177	23.2474	13.5525	14.8689	8.73333	20.0085	13.223	10.7062	15.7397
ENSSSCG00000031360	ADO	NO	0.6113	7.27879	9.87812	13.0954	22.4007	13.4503	15.7036	7.11965	16.8281	13.2193	10.236	16.2026
ENSSSCG00000030013	LOC100625897	NO	0.789938	6.50642	4.41129	19.8065	22.4645	17.2287	14.1219	9.99233	11.1093	13.2051	13.3835	13.0267
ENSSSCG00000013629	SMARCA4	NO	0.988448	8.16158	4.35186	11.3163	19.9441	19.3178	18.4763	10.1267	13.9113	13.2007	12.2306	14.1709
ENSSSCG00000033842	CFDP1	NO	0.0473953	15.2011	4.37229	5.75243	17.8862	25.0495	16.6503	16.7128	3.74184	13.1708	15.679	10.6627
ENSSSCG00000024341	USP20	NO	0.861012	11.3864	5.3676	14.2702	22.499	13.2095	17.766	7.23903	13.4898	13.1534	11.5263	14.7806
ENSSSCG00000037595	AP3S1	NO	0.203029	15.3321	5.74776	14.8525	12.7595	16.9759	13.7393	16.836	8.94521	13.1485	15.9991	10.2979
ENSSSCG00000013936	NDUFA13	NO	0.960764	13.5031	9.98423	9.28406	13.6231	16.4374	11.1296	10.5781	20.5978	13.1422	12.4506	13.8337
ENSSSCG00000036566	LY6G6C	NO	0.580048	8.93886	8.90039	8.64541	21.7303	13.9905	18.592	9.6535	14.665	13.1395	10.3071	15.9719
ENSSSCG00000009799	DIABLO	NO	0.913972	7.69129	1.85223	16.2269	24.9156	15.1002	15.2247	8.43477	15.5738	13.1274	11.8633	14.3916
ENSSSCG00000034070	ZNF592	NO	0.90982	7.05941	2.42217	8.05027	38.461	20.669	11.6788	6.01244	10.5628	13.1145	10.4478	15.7812
ENSSSCG00000035318	NUP58	NO	0.726769	6.91115	12.1754	13.1317	18.2068	13.744	18.3638	13.4733	8.8179	13.103	11.815	14.391
ENSSSCG00000016306	USP40	NO	0.400928	11.0005	5.54628	8.85802	21.0148	14.0554	17.5696	5.46278	21.1376	13.0806	9.84417	16.3171
ENSSSCG00000024144	NDUFS7	NO	0.910141	6.08567	3.31054	12.4624	31.7581	15.9908	13.9818	11.6899	9.29486	13.0718	11.5572	14.5863
ENSSSCG00000036537	NFIC	NO	0.63152	8.51067	4.76257	12.3042	27.9786	12.4831	17.4627	8.35976	12.7036	13.0706	10.4144	15.7269
ENSSSCG00000005038	PSMC6	NO	0.893948	9.89931	5.06982	8.07767	23.4056	16.6267	14.9082	10.3695	16.019	13.047	11.2433	14.8507
ENSSSCG00000023393	ZBBX	NO	0.651724	14.8547	1.51187	14.1477	16.8814	17.3908	16.1983	8.56711	14.5422	13.0118	13.7401	12.2834
ENSSSCG00000029944	FASN	NO	0.528965	16.7479	6.80457	11.2959	17.4859	14.5592	14.3637	14.6536	8.09259	13.0004	14.3141	11.6867
ENSSSCG00000002129	RPGRIP1	NO	0.928822	12.0783	5.55168	7.15328	16.1616	16.3321	13.6161	11.8033	21.2547	12.9939	11.8417	14.146
ENSSSCG00000027667	EML1	NO	0.728202	10.8367	7.82488	14.4607	25.6973	12.8708	13.8477	6.80275	11.6006	12.9927	11.2427	14.7426
ENSSSCG00000009955	CRYBB2	NO	0.942925	5.76561	4.09943	13.9743	25.2245	16.0469	12.1909	8.01548	18.4855	12.9753	10.9506	15.0001
ENSSSCG00000004013	SMOC2	NO	0.812212	12.154	6.7427	13.865	31.3705	10.664	9.87268	7.10758	11.9586	12.9669	10.9476	14.9861
ENSSSCG00000018044	ALDH3A1	NO	0.978043	12.8536	5.69434	6.50875	7.43931	31.1621	30.4339	2.25106	7.2566	12.95	13.1939	12.706
ENSSSCG00000001083	HDGFL1	NO	0.813475	9.78546	4.45558	10.7131	23.0376	17.8032	16.4975	4.11694	17.1146	12.9405	10.6047	15.2763
ENSSSCG00000010243	CCAR1	NO	0.92489	10.9544	4.06165	11.8889	20.5592	13.9197	18.2988	11.0716	12.582	12.917	11.9586	13.8754
ENSSSCG00000010070	SMARCB1	NO	0.99841	11.977	1.2009	11.2897	11.0586	23.5085	17.7067	11.9022	14.6083	12.9065	14.6694	11.1436
ENSSSCG00000006062	YWHAZ	NO	0.30022	12.907	3.22471	5.1133	16.3148	12.174	20.7961	25.963	6.74553	12.9048	14.0393	11.7703
ENSSSCG00000040519	URGCP	NO	0.671946	9.9094	12.7608	15.3291	9.59238	14.7492	7.98514	12.7879	20.0453	12.8949	13.1939	12.5959
ENSSSCG00000006903	RPAP2	NO	0.219428	11.3977	2.40695	12.198	18.8903	19.2524	17.2512	11.0416	10.4527	12.8614	13.4724	12.2503
ENSSSCG00000014969	CEP57	NO	0.99841	11.6966	7.11481	10.5938	16.6035	11.9743	14.394	14.4824	16.0272	12.8608	12.1868	13.5349
ENSSSCG00000000972	TUBGCP6	NO	0.680775	10.0355	6.94332	10.2396	19.9996	16.7661	15.4937	7.33502	16.0185	12.8539	11.0941	14.6138
ENSSSCG00000002266	CHD2	NO	0.940639	11.7403	4.7486	10.7034	20.7541	11.7112	13.9125	14.4356	14.8241	12.8537	12.1476	13.5598
ENSSSCG00000021724	KIF19	NO	0.665604	6.01518	3.82087	12.5507	24.2823	11.9426	14.8384	10.6003	18.688	12.8423	10.2772	15.4074
ENSSSCG00000001727	TNFRSF21	NO	0.818928	7.11017	4.35151	10.1937	22.7515	18.5135	18.1745	8.72442	12.8529	12.834	11.1354	14.5326
ENSSSCG00000016627	ASZ1	NO	0.787296	13.4341	6.75201	6.20781	20.7399	8.4289	7.67689	14.7271	24.6489	12.827	10.6995	14.9544
ENSSSCG00000044074	LOC102162368	NO	0.895412	8.13135	4.26471	11.7034	21.487	13.3261	24.2389	9.09332	10.3381	12.8229	10.5635	15.0822
ENSSSCG00000006717	PHGDH	NO	0.0595254	7.09297	2.28633	13.318	14.1064	23.4951	14.9018	17.5981	9.71166	12.8138	15.376	10.2516
ENSSSCG00000015524	FAM20B	NO	0.547801	9.71531	6.85646	8.57279	20.1241	16.8589	16.3768	8.51721	15.4765	12.8123	10.916	14.7085
ENSSSCG00000026606	PAIP2	NO	0.181798	14.7734	0.181493	11.1207	21.2314	11.5645	10.7337	26.8167	6.02468	12.8058	16.0688	9.54282
ENSSSCG00000010728	CPXM2	NO	0.0769143	11.1556	11.3046	9.99497	24.948	6.05994	7.7046	9.57321	21.643	12.798	9.19593	16.4
ENSSSCG00000010956	NAA35	NO	0.680775	12.5277	6.71586	11.1926	23.5167	9.64769	12.3053	8.18904	18.0893	12.773	10.3893	15.1568
ENSSSCG00000023533	ZNF236	NO	0.245583	6.04087	4.47412	7.42477	23.8345	18.3086	20.1084	8.03063	13.9233	12.7681	9.95123	15.5851
ENSSSCG00000040773	TOB1	NO	0.728202	11.5094	8.90283	11.5284	10.7624	18.0592	13.3898	14.7729	12.9896	12.7393	13.9675	11.5112
ENSSSCG00000033726		NO	0.93458	8.55255	4.43785	12.0091	25.7235	17.1609	18.3319	6.9816	8.70756	12.7381	11.176	14.3002
ENSSSCG00000001983	SDR39U1	NO	0.728202	7.1706	4.72632	8.58656	26.15	23.7186	17.9652	5.80724	7.67824	12.7253	11.3207	14.1299
ENSSSCG00000023929	TXNRD3	NO	0.883168	5.75355	2.84002	11.0307	21.5196	13.6557	11.5278	11.5469	23.9277	12.7253	10.4967	14.9538
ENSSSCG00000007951	CREBBP	NO	0.926546	9.7594	4.49045	9.61504	21.3117	14.2814	15.1045	11.4556	15.7587	12.7221	11.2779	14.1664
ENSSSCG00000022787	RABIF	NO	0.564208	10.5853	7.22736	8.97495	18.5106	15.5843	15.2358	8.04749	17.6061	12.7215	10.798	14.645
ENSSSCG00000012965	DRAP1	NO	0.927421	12.0489	6.90069	7.53287	16.2205	15.001	17.9327	15.6972	10.4339	12.721	12.57	12.872
ENSSSCG00000007878	PARN	NO	0.842787	9.82307	4.98251	8.36279	15.3158	17.581	18.4698	9.28605	17.8185	12.7049	11.2632	14.1467
ENSSSCG00000013740	SYCE2	NO	0.86277	1.46025	0	12.8063	21.3231	18.5917	24.383	2.91604	20.1423	12.7028	8.94357	16.4621
ENSSSCG00000038904	FRAT2	NO	0.868623	11.1953	11.8723	7.77935	16.6966	14.9864	13.9532	12.4113	12.5211	12.6769	11.5931	13.7608
ENSSSCG00000040421	HMG20B	NO	0.446241	12.1716	3.94629	9.28999	14.1198	15.1958	14.6665	22.5874	9.31232	12.6612	14.8112	10.5112
ENSSSCG00000023873	AZIN1	NO	0.609016	12.7122	4.22995	7.29176	16.1714	15.8474	10.8414	17.9314	16.2527	12.6598	13.4457	11.8739
ENSSSCG00000034045	ERGIC3	NO	0.979819	10.5639	2.28763	9.26279	18.1134	20.9512	20.3065	5.52567	14.1411	12.644	11.5759	13.7122
ENSSSCG00000009431	DGKH	NO	0.782717	7.57274	3.94147	12.6034	23.9896	12.3925	14.3031	9.14025	17.1942	12.6421	10.4272	14.8571
ENSSSCG00000030796	CXorf65	NO	0.902812	9.92679	3.93384	16.4534	21.9113	13.4085	17.0134	9.02706	9.43197	12.6383	12.204	13.0726
ENSSSCG00000035676	G3BP1	NO	0.704215	10.774	6.15803	7.73054	15.1135	15.5295	19.2224	6.94554	19.6261	12.6374	10.2449	15.03
ENSSSCG00000034058	ARHGDIA	NO	0.75282	6.38182	3.53357	10.8259	15.7105	13.4602	11.1422	25.138	14.9041	12.637	13.9515	11.3226
ENSSSCG00000010732	FAM53B	NO	0.779142	13.1527	8.37799	6.74978	33.4883	9.2342	10.4366	7.11278	12.5051	12.6322	9.06237	16.202
ENSSSCG00000016943	ADAMTS6	NO	0.56863	9.54266	6.04463	6.04433	21.5852	15.4317	15.5991	11.5789	14.9457	12.5965	10.6494	14.5437
ENSSSCG00000026175	FAM81B	NO	0.673754	12.8842	4.38877	14.7077	18.9605	13.0587	11.4196	11.4241	13.8506	12.5868	13.0187	12.1549
ENSSSCG00000004782	BUB1B	NO	0.854537	11.8491	6.0759	11.7194	17.5939	12.5013	16.0402	8.29269	16.5433	12.577	11.0906	14.0633
ENSSSCG00000032835	ATP6V1G1; TMEM268	NO	0.187095	15.7974	3.78443	9.65386	13.1976	17.4211	12.7877	14.9789	12.9224	12.5679	14.4628	10.673
ENSSSCG00000029251	MAP4	NO	0.594263	6.93311	4.09855	9.89348	24.2426	15.9168	15.4311	8.59351	15.4243	12.5667	10.3342	14.7992
ENSSSCG00000035663	LOC102167351	NO	0.564208	8.26522	6.54262	12.2978	21.5388	14.8014	15.6881	6.62391	14.5739	12.5415	10.4971	14.5859
ENSSSCG00000039234		NO	0.880937	11.3097	5.14807	16.8126	12.7725	9.88102	17.7088	13.0688	13.4731	12.5218	12.768	12.2756
ENSSSCG00000009995	HORMAD2	NO	0.757651	11.7584	6.04629	11.888	20.233	8.19409	13.0286	9.6408	19.3313	12.5151	10.3703	14.6598
ENSSSCG00000010686	BAG3	NO	0.939532	10.0052	5.00943	12.6814	22.2778	13.0116	15.317	11.3183	10.3772	12.4998	11.7541	13.2454
ENSSSCG00000017811		NO	0.737721	2.71342	7.78555	7.34382	10.9309	9.607	2.81016	53.7235	4.99872	12.4891	18.3469	6.63134
ENSSSCG00000007259	BPIFA2	NO	0.822194	8.96087	4.99947	16.2313	25.1641	17.1451	26.8064	0	0.547595	12.4819	10.5843	14.3794
ENSSSCG00000007574	SDK1	NO	0.674247	11.3944	5.31766	8.79476	21.171	13.5435	13.9867	7.72362	17.8697	12.4752	10.3641	14.5862
ENSSSCG00000009553	TUBGCP3	NO	0.373913	9.08175	6.79632	10.4322	22.1997	13.6653	13.9764	4.70224	18.9209	12.4719	9.47038	15.4733
ENSSSCG00000024418	RHOU	NO	0.633	6.21491	5.51027	12.1424	24.2685	13.2098	12.3005	8.79274	17.2443	12.4604	10.09	14.8309
ENSSSCG00000007124	CST8	NO	0.737721	10.824	3.23854	5.50973	18.9346	12.4109	16.3784	8.81584	23.5033	12.4519	9.39013	15.5137
ENSSSCG00000017098	C5orf49	NO	0.708814	6.58414	16.1343	8.52179	18.4993	13.2543	14.4414	10.2304	11.8327	12.4373	9.64764	15.2269
ENSSSCG00000008821	SLAIN2	NO	0.949713	9.9439	10.332	10.9677	13.0653	14.9263	16.465	10.5765	13.1846	12.4327	11.6036	13.2617
ENSSSCG00000009946	SART3	NO	0.955494	12.2199	4.35664	12.7251	24.6657	12.6951	11.3945	9.15641	12.1814	12.4244	11.6991	13.1496
ENSSSCG00000033849	CD37	NO	0.794585	10.7333	7.64733	6.94938	17.5815	15.6199	10.4262	9.57721	20.6395	12.3968	10.7199	14.0736
ENSSSCG00000016959	MARVELD2	NO	0.590264	3.25186	3.51454	10.5921	22.1639	25.3394	23.0695	4.04807	7.11663	12.387	10.8079	13.9661
ENSSSCG00000038121		NO	0.439747	9.53188	5.23162	13.1265	12.5221	16.0454	9.82692	19.2606	13.3412	12.3608	14.4911	10.2305
ENSSSCG00000000114	PICK1	NO	0.925863	10.299	4.82253	7.6415	19.2174	14.4578	17.6025	11.5851	13.1783	12.3505	10.9958	13.7052
ENSSSCG00000015258	GLB1L2	NO	0.9165	12.2488	3.42872	13.8615	30.8665	10.9592	10.8865	5.98065	10.4792	12.3389	10.7625	13.9152
ENSSSCG00000001471	BRD2	NO	0.983206	9.72291	6.21062	9.69876	17.5401	16.0577	18.2931	11.2289	9.77847	12.3163	11.6771	12.9556
ENSSSCG00000018057	SOCS7	NO	0.696907	9.47019	6.07459	11.1881	23.7253	13.8576	14.5729	7.52821	12.1029	12.315	10.511	14.1189
ENSSSCG00000001056	RANBP9	NO	0.720513	12.0857	4.44113	10.9043	13.5128	15.7944	13.4971	11.2996	16.8359	12.2964	12.521	12.0717
ENSSSCG00000017790	TAOK1	NO	0.988629	25.2535	10.4749	5.783	8.77453	3.37201	10.0608	14.5881	20.0242	12.2914	12.2491	12.3336
ENSSSCG00000005724	SETX	NO	0.754893	9.77448	5.00497	7.84787	17.8896	15.6058	15.5314	9.70837	16.9406	12.2879	10.7341	13.8417
ENSSSCG00000012557	NUP62CL	NO	0.96952	14.9418	11.9538	10.4126	18.1429	13.3378	7.58013	10.2948	11.6102	12.2842	12.2467	12.3218
ENSSSCG00000012772	BCAP31	NO	0.853347	11.5377	11.5313	5.81424	11.0206	15.9663	9.79659	10.377	22.1932	12.2796	10.9238	13.6354
ENSSSCG00000029920	ELF2	NO	0.91764	11.2543	4.41676	7.59891	14.6242	15.3128	14.56	14.0964	16.3659	12.2787	12.0656	12.4917
ENSSSCG00000009241	COPS4	NO	0.761515	13.3653	3.34097	9.44409	14.5313	17.5297	15.1813	10.2617	14.5068	12.2702	12.6502	11.8901
ENSSSCG00000010565	DPCD	NO	0.978667	10.0561	5.70177	11.5354	19.6744	15.5974	14.9421	8.22744	12.3299	12.2581	11.3541	13.162
ENSSSCG00000010834	MIA3	NO	0.978612	8.59827	7.41821	12.0769	13.1761	13.7829	12.8432	12.2095	17.7485	12.2317	11.6669	12.7965
ENSSSCG00000003262	TFPT	NO	0.935065	10.0088	7.32715	8.69918	18.962	20.431	13.4177	6.99926	11.8133	12.2073	11.5346	12.8801
ENSSSCG00000024679	UPF3A	NO	0.579615	11.7403	5.01011	13.2721	14.635	10.9781	11.1091	14.8857	15.8496	12.185	12.719	11.651
ENSSSCG00000001924	BBS4; ARIH1	NO	0.758685	11.7179	8.70164	9.54507	16.2461	7.9471	16.1797	11.7966	15.171	12.1631	10.2517	14.0746
ENSSSCG00000039135	ARHGAP33	NO	0.392694	5.89323	7.79554	8.65091	19.0921	21.4303	19.3672	4.29753	10.5575	12.1355	10.068	14.2031
ENSSSCG00000027324	VPS35L	NO	0.813638	10.8002	4.92533	8.21584	15.7391	21.871	14.4442	8.24531	12.7679	12.1261	12.2831	11.9691
ENSSSCG00000003106	AP2S1	NO	0.787263	10.7192	3.07086	9.86738	12.7194	20.0358	23.1906	8.91992	8.27173	12.0994	12.3856	11.8131
ENSSSCG00000045641		NO	0.867687	7.66529	5.72349	7.53343	23.2407	17.7006	15.1991	7.95485	11.7262	12.093	10.2135	13.9724
ENSSSCG00000010083	PPIL2	NO	0.728202	10.68	6.68147	7.83696	17.936	15.3845	13.9979	7.98846	16.1784	12.0855	10.4725	13.6984
ENSSSCG00000025087	ASPH	NO	0.848812	9.49628	4.80336	12.2492	18.1109	14.4218	12.0794	11.1788	14.3066	12.0808	11.8365	12.3251
ENSSSCG00000004729	GANC	NO	0.793308	10.5671	4.32533	10.665	21.3946	9.13096	12.7359	9.7582	18.0002	12.0722	10.0303	14.114
ENSSSCG00000004681	TRIM69	NO	0.754893	9.65742	2.93759	7.45327	24.5365	14.6756	14.498	5.33868	17.4666	12.0704	9.28123	14.8597
ENSSSCG00000047642	LOC110257823	NO	0.939045	13.6926	5.06534	4.07886	27.3378	27.5917	9.10388	2.06207	7.61699	12.0686	11.8563	12.281
ENSSSCG00000007275	RALY	NO	0.83424	9.52805	3.17361	10.4703	15.2066	11.9473	14.2254	11.2999	20.6516	12.0628	10.8114	13.3143
ENSSSCG00000007927	PPL	NO	0.952118	5.96256	4.21825	12.3576	20.4346	13.8104	12.0135	11.1361	16.3622	12.0369	10.8166	13.2571
ENSSSCG00000032171	TCF20	NO	0.776556	7.49048	4.75239	9.89191	19.6739	16.1	15.4662	8.40792	14.4243	12.0259	10.4726	13.5792
ENSSSCG00000003666		NO	0.99841	7.52796	4.00782	10.521	18.1315	19.0739	13.4883	8.03521	15.3592	12.0181	11.2895	12.7467
ENSSSCG00000037427	PTDSS2	NO	0.795585	4.46956	7.91799	9.34531	18.0115	17.4514	16.0016	10.5093	12.2946	12.0001	10.4439	13.5564
ENSSSCG00000016079	MOBKL3	NO	0.956738	8.60854	3.4478	8.76693	20.1759	16.1633	14.4378	10.9807	13.3382	11.9899	11.1299	12.8499
ENSSSCG00000009994	MTMR3	NO	0.804639	9.74356	2.74937	6.94691	17.8788	15.3037	13.6684	13.6121	16.012	11.9894	11.4016	12.5771
ENSSSCG00000033497	RERE	NO	0.88972	13.7677	5.62248	8.78028	18.214	11.8184	13.3557	8.81654	15.3422	11.9647	10.7957	13.1336
ENSSSCG00000007125	LOC100516119	NO	0.9265	13.4154	2.51653	6.86221	20.5511	15.9557	18.5782	4.93811	12.8415	11.9573	10.2929	13.6218
ENSSSCG00000009626	SORBS3	NO	0.645723	4.94055	5.03928	8.45299	22.5548	17.1325	17.4651	8.24433	11.7896	11.9524	9.69259	14.2122
ENSSSCG00000025374	DVL3	NO	0.690614	7.86025	5.71917	9.8236	22.0399	15.2776	15.8384	7.64264	11.3956	11.9496	10.151	13.7483
ENSSSCG00000010742	UROS	NO	0.79589	6.94585	4.69646	9.59126	27.4112	13.6458	14.5555	7.81445	10.9207	11.9477	9.49934	14.396
ENSSSCG00000008637	TAF1B	NO	0.917677	10.4295	4.69666	6.01375	19.6899	14.2251	13.6279	11.9794	14.8404	11.9378	10.6619	13.2137
ENSSSCG00000003194	AKT1S1	NO	0.871339	5.53928	3.67594	12.7858	17.2996	17.5527	21.264	5.69682	11.6236	11.9297	10.3937	13.4658
ENSSSCG00000022714	OSER1	NO	0.983993	7.97351	4.41312	8.64423	11.0868	15.2982	18.0797	9.38506	20.3383	11.9024	10.3253	13.4795
ENSSSCG00000035148	ZNF268	NO	0.781739	7.31331	3.32972	5.53713	17.0832	16.1137	16.2122	10.5078	19.1217	11.9024	9.868	13.9367
ENSSSCG00000001905	ARID3B	NO	0.0899284	6.3663	4.99414	6.90414	18.4434	16.2505	21.843	5.92197	14.4837	11.9009	8.86073	14.941
ENSSSCG00000017591	NME2	NO	0.20759	16.3002	1.97396	4.35818	12.2646	23.7291	7.03518	25.7782	3.6712	11.8888	17.5414	6.23624
ENSSSCG00000005183	PSIP1	NO	0.5168	14.7912	3.17361	9.97452	17.7532	14.201	11.2814	12.6728	11.2405	11.886	12.9099	10.8622
ENSSSCG00000030137	LMNTD2	NO	0.687713	5.88224	5.27417	10.0623	18.3334	20.773	17.2066	5.02059	12.5269	11.8849	10.4345	13.3353
ENSSSCG00000013455	IZUMO4	NO	0.932579	12.2391	5.20679	8.64309	26.3714	11.5418	10.6531	8.56438	11.8479	11.8834	10.2471	13.5198
ENSSSCG00000027467	DZIP1L	NO	0.802064	11.3582	5.42328	8.01331	20.7636	11.7963	11.9169	9.94507	15.7351	11.869	10.2782	13.4597
ENSSSCG00000013930	ATP13A1	NO	0.762252	5.42685	2.97985	8.80011	18.22	14.5703	13.5155	11.1977	20.2137	11.8655	9.99873	13.7323
ENSSSCG00000035570	HNRNPL	NO	0.819895	12.3935	5.48346	8.44933	15.4746	12.6764	12.6868	14.6241	13.1109	11.8624	12.0358	11.689
ENSSSCG00000037792	COX7A1	NO	0.0704394	0.194104	32.5021	0.214049	18.2659	17.5456	25.7219	0	0.233453	11.8346	4.48845	19.1808
ENSSSCG00000035857	LOC110260932	NO	0.97392	9.13825	5.15311	12.8129	16.0245	18.3259	16.5044	4.75235	11.8657	11.8221	11.2574	12.3869
ENSSSCG00000001024	RIOK1	NO	0.739442	6.36942	3.02652	9.79213	20.3296	8.85156	11.4234	12.6512	22.1283	11.8215	9.41608	14.227
ENSSSCG00000008335	GMCL1	NO	0.874392	8.98279	4.66683	11.4938	17.3885	13.0224	14.4867	7.2544	17.2574	11.8191	10.1884	13.4499
ENSSSCG00000025597	LOC106507258	NO	0.778246	7.39344	4.51156	15.2356	26.6583	8.45925	9.73075	7.2547	15.2913	11.8169	9.58575	14.048
ENSSSCG00000023304	SRRM2	NO	0.786989	7.61457	3.6852	10.3945	17.5626	15.5993	14.9645	12.4682	12.0649	11.7942	11.5191	12.0693
ENSSSCG00000004222	NCOA7	NO	0.709038	7.02374	3.36921	15.7554	21.0914	10.8675	8.30651	14.9376	12.9901	11.7927	12.1461	11.4393
ENSSSCG00000007874	ABCC1	NO	0.666805	5.80994	2.93869	14.3523	29.8761	12.5327	13.341	4.47288	10.975	11.7873	9.29194	14.2827
ENSSSCG00000010690	SEC23IP	NO	0.964127	7.4836	3.33657	3.6714	10.4249	33.313	9.34005	16.4164	10.269	11.7819	15.2211	8.34264
ENSSSCG00000037372		NO	0.872436	6.85346	5.87862	11.8787	17.7412	16.3846	18.3433	6.99586	10.0466	11.7653	10.5281	13.0024
ENSSSCG00000009516	UBAC2	NO	0.973795	7.50192	2.73745	9.99827	14.5517	14.0015	17.1911	9.27823	18.7312	11.7489	10.195	13.3029
ENSSSCG00000003627	ZMYM4	NO	0.865973	13.0283	5.54383	9.32131	17.9898	11.2428	12.2241	7.9492	16.5039	11.7254	10.3854	13.0654
ENSSSCG00000026333	GTSF1	NO	0.579615	8.63851	4.79917	13.7507	17.1252	19.5841	7.77762	12.0583	10.0587	11.724	13.5079	9.94018
ENSSSCG00000006386	COPA	NO	0.722573	13.0781	4.91698	7.77319	15.6037	12.2349	10.3454	15.1576	14.4806	11.6988	12.061	11.3366
ENSSSCG00000010779	SYCE1	NO	0.988983	9.96237	5.8582	11.8214	12.6917	14.9432	14.7285	8.05515	15.5107	11.6964	11.1955	12.1973
ENSSSCG00000000039	POLDIP3	NO	0.977231	7.80006	3.61125	8.8421	18.0768	18.2832	17.1904	9.34017	10.3136	11.6822	11.0664	12.298
ENSSSCG00000014970	MTMR2	NO	0.96262	12.9298	4.42014	11.2582	17.4316	12.172	13.6931	8.83293	12.7141	11.6815	11.2982	12.0647
ENSSSCG00000002504	AK7	NO	0.558952	7.22253	7.96768	7.84877	19.4457	10.2695	15.7915	7.6404	17.2212	11.6759	8.24529	15.1066
ENSSSCG00000013746	CALR	NO	0.115855	15.3804	2.99308	12.1513	10.3739	16.985	10.6549	12.5782	12.2902	11.6759	14.2737	9.078
ENSSSCG00000008040	TSC2	NO	0.580091	7.06831	5.15928	8.79105	20.3894	18.3273	16.9066	5.67748	10.9933	11.6641	9.96603	13.3621
ENSSSCG00000027307	NDUFA11	NO	0.433778	7.31258	4.64933	8.94388	20.7232	14.8417	20.0879	3.0592	13.6386	11.6571	8.53934	14.7748
ENSSSCG00000035820	TXNDC17	NO	0.919869	5.52117	3.32987	4.17655	5.93893	27.0875	19.3003	10.6924	17.1066	11.6442	11.8694	11.4189
ENSSSCG00000035045	DOCK1	NO	0.875823	8.19077	3.1108	6.71326	14.1866	16.6695	14.3439	13.2869	16.565	11.6333	11.2151	12.0516
ENSSSCG00000011194	ANKRD28	NO	0.77896	8.90574	4.46133	9.59068	21.6276	12.8275	13.7222	7.21274	14.7026	11.6313	9.63416	13.6284
ENSSSCG00000021814	ZMYM2	NO	0.845375	11.0179	4.97227	9.50267	18.5666	11.6563	12.7715	8.58964	15.9647	11.6302	10.1916	13.0688
ENSSSCG00000036075	WASHC3	NO	0.918466	16.8402	6.0328	10.6048	20.9463	3.5376	12.4092	13.4055	9.15628	11.6166	11.097	12.1362
ENSSSCG00000035723	GFY	NO	0.492645	10.2829	9.49577	9.02192	17.2819	12.4556	15.3847	5.55212	13.3451	11.6025	9.32812	13.8769
ENSSSCG00000005948	TG	NO	0.614227	7.72799	4.78765	8.08795	18.0905	16.7577	16.4641	7.23231	13.636	11.598	9.95149	13.2446
ENSSSCG00000027016	C19orf47	NO	0.942387	4.18102	5.42353	10.3491	22.7308	16.1242	12.4126	9.90964	11.5428	11.5842	10.141	13.0274
ENSSSCG00000030131	C15orf40	NO	0.749765	9.11528	1.04081	4.35515	6.93153	27.3784	19.0572	9.34662	15.0624	11.5359	12.5489	10.523
ENSSSCG00000009522	PCCA	NO	0.699667	7.79335	3.07919	5.82747	22.3046	7.50825	8.69409	7.58	29.2815	11.5086	7.17727	15.8399
ENSSSCG00000020743	RABGAP1	NO	0.929075	11.2869	4.21032	8.25557	13.7324	10.8771	14.2012	15.6387	13.8207	11.5029	11.5146	11.4911
ENSSSCG00000000272	SP1	NO	0.895412	7.68055	3.09039	9.1158	21.2743	15.7371	14.3912	10.7096	10.0121	11.5014	10.8108	12.192
ENSSSCG00000032723	ACER3	NO	0.703095	9.22066	6.50887	10.7275	20.0045	9.59196	10.1287	9.75754	16.0666	11.5008	9.82442	13.1772
ENSSSCG00000033003	WFDC2	NO	0.871339	2.55931	0	11.8414	52.509	8.33815	11.023	0	5.7035	11.4968	5.6847	17.3089
ENSSSCG00000007659	ZCWPW1	NO	0.835339	11.8507	3.62882	8.19679	18.8889	11.9254	13.7591	6.32338	17.2976	11.4838	9.57407	13.3936
ENSSSCG00000001629	USP49	NO	0.712768	8.06142	6.4132	10.5787	18.8648	14.4372	13.4899	6.68354	13.3369	11.4832	9.94021	13.0262
ENSSSCG00000035727	SURF1	NO	0.853347	9.93689	6.69917	4.60632	13.7009	16.0574	18.6155	10.8357	11.2162	11.4585	10.3591	12.5579
ENSSSCG00000038086	ECHS1	NO	0.960259	6.67129	1.02231	3.21889	15.0734	29.6112	15.9581	12.1322	7.90434	11.449	12.9084	9.98955
ENSSSCG00000022864	EIF6	NO	0.917071	6.35547	2.83159	10.3602	19.5245	15.489	14.7771	6.84271	15.365	11.4432	9.76184	13.1246
ENSSSCG00000002633	GAS8	NO	0.831708	9.83349	4.20713	8.01104	22.5431	12.1054	9.24008	7.17158	18.3679	11.435	9.28037	13.5896
ENSSSCG00000030672	ZNF692	NO	0.683762	8.35285	6.60169	9.22174	19.815	14.5229	18.0342	5.96168	8.95594	11.4332	9.51479	13.3517
ENSSSCG00000024718	RIBC2	NO	0.534779	4.19314	4.84388	10.1609	19.9843	10.2091	16.1468	9.66582	16.2152	11.4274	8.55722	14.2976
ENSSSCG00000011199	TBC1D5	NO	0.871339	7.70126	4.13405	11.1191	18.5359	15.0909	13.8749	6.28143	14.5804	11.4147	10.0482	12.7813
ENSSSCG00000003144	DHDH; BAX	NO	0.118619	0.587075	21.5195	1.14682	0.82227	0.12071	66.6689	0.139847	0.292537	11.4122	0.498613	22.3258
ENSSSCG00000031657	JUND	NO	0.97392	7.61202	9.23002	10.4296	15.8923	12.0668	14.4104	12.5687	8.97007	11.3975	10.6693	12.1257
ENSSSCG00000036804	TCEA2	NO	0.983206	7.58426	4.27207	9.58594	15.1364	14.7054	12.6295	10.5205	16.6324	11.3833	10.599	12.1676
ENSSSCG00000003086	APOC2	NO	0.868623	6.47368	1.75597	8.14895	17.6851	18.9088	19.831	10.7821	7.45642	11.3803	11.0784	11.6821
ENSSSCG00000039148	P4HB	NO	0.302317	11.6521	4.17788	8.33257	10.6304	18.2624	12.583	13.3542	11.9888	11.3727	12.9003	9.84503
ENSSSCG00000007498	FAM209B	NO	0.886248	6.37892	3.19719	6.83698	17.568	20.581	18.1781	6.42626	11.7815	11.3685	10.0558	12.6812
ENSSSCG00000004857	ATP9B	NO	0.853347	9.15152	4.99999	8.80969	13.7147	13.097	15.8385	8.52481	16.7739	11.3638	9.89576	12.8318
ENSSSCG00000040490		NO	0.872436	8.45639	39.7519	9.73522	7.45793	7.71938	5.01093	3.95726	8.75516	11.3555	7.46706	15.244
ENSSSCG00000009988	THOC5	NO	0.932579	7.73979	4.96591	11.8924	16.3976	10.8741	17.4363	9.96342	11.5618	11.3539	10.1174	12.5904
ENSSSCG00000033672	H1-4	NO	0.427824	8.34567	1.70707	6.59711	14.4025	19.2415	6.8345	20.6655	12.9218	11.3395	13.7124	8.96648
ENSSSCG00000024763	TEX29	NO	0.949713	1.79998	12.7736	13.4164	5.68475	25.7698	26.1429	2.12018	2.99373	11.3377	10.7766	11.8987
ENSSSCG00000037557	DRC3	NO	0.683873	4.64952	2.71132	6.48924	18.1207	20.4804	17.4469	5.85728	14.9257	11.3351	9.36911	13.3012
ENSSSCG00000028117	CDK5RAP2	NO	0.9061	6.96954	2.90214	10.2932	19.0325	13.9072	14.0035	7.58465	15.9205	11.3267	9.68866	12.9647
ENSSSCG00000003288	HSPBP1	NO	0.627909	4.91719	4.42927	9.56158	19.1259	18.1514	15.7395	2.23984	16.4424	11.3259	8.7175	13.9343
ENSSSCG00000007558	INTS1	NO	0.738098	7.15588	5.90048	11.571	19.6083	13.8501	16.4429	6.54597	9.50802	11.3228	9.78073	12.8649
ENSSSCG00000013627	PRKCSH	NO	0.835277	8.42475	4.34015	12.3025	19.2346	16.8524	11.3513	7.73994	10.1824	11.3035	11.3299	11.2771
ENSSSCG00000027907	BSG	NO	0.737721	11.3795	4.90643	4.65878	18.2297	13.9236	14.2996	6.22078	16.6704	11.2861	9.04566	13.5265
ENSSSCG00000002252	ARRDC4	NO	0.970887	5.87362	3.72594	13.2083	23.3943	11.7961	13.23	9.00812	10.0484	11.2856	9.97155	12.5997
[truncated: 5,520 more rows]
