# Supplementary material for: Characterization of the Impact of Density Gradient Centrifugation on the Profile of the Pig Sperm Transcriptome by RNA-Seq
Source: Front Vet Sci. 2021 Jul 19;8:668158. doi: 10.3389/fvets.2021.668158 (PMC8326511; doi:10.3389/fvets.2021.668158)
Supplement: Supplementary Table 7 — Results of the 10 shuffles to organize the eight samples into 2 four-sample random groups. P_B1, Purified sample of B1; NP_B1, Non-purified sample of B1; P_B2, Purified sample of B2; NP_B2, Non-purified sample of B2; P_B3, Purified sample of B3; NP_B3, Non-purified sample of B3; P_B4, Purified sample of B4; NP_B4, Non-purified sample of B4. Random shuffles are identified as Random1, Random2, Random3, Random4, Random5, Random6, Random7, Random8, Random9, Random10. A and B denote the randomly generated groups in each shuffle. [file Table_7.xlsx]

## Sheet: Sheet1
Sample name	Original	Random1	Random2	Random3	Random4	Random5	Random6	Random7	Random8	Random9	Random10
NP_B1	NP	B	A	B	B	B	A	B	A	A	A
P_B1	P	B	B	A	A	A	B	B	A	B	B
NP_B2	NP	B	B	B	B	B	A	A	B	B	B
P_B2	P	A	B	B	B	A	B	A	B	A	A
NP_B3	NP	B	A	B	A	A	B	A	B	A	B
P_B3	P	A	B	A	B	B	A	B	A	B	A
NP_B4	NP	A	A	A	A	A	A	A	A	A	A
P_B4	P	A	A	A	A	B	B	B	B	B	B
Number of differentially abundant genes	372	4	2	2	2	2	2	0	5	3	1
