# Supplementary material for: Characterization of the Impact of Density Gradient Centrifugation on the Profile of the Pig Sperm Transcriptome by RNA-Seq
Source: Front Vet Sci. 2021 Jul 19;8:668158. doi: 10.3389/fvets.2021.668158 (PMC8326511; doi:10.3389/fvets.2021.668158)
Supplement: Supplementary Table 8 — Results of the Gene Ontology analysis of the 372 differentially abundant genes between the purified and the non-purified samples. [file Table_8.xlsx]

## Sheet: Sheet1
GO Term	p-value (Bonferroni corrected)	Percentage of associated genes	Number of genes	Associated genes found
translation	3.5053e-29	16.0839	46	RPL5, RPL3, RPL32, RPL10, RPLP1, RPL12, RPL11, RPL10A, RPL6, EEF1B2, RPS4X, RPS17, RPS16, RPS15A, RPL36AL, RACK1, RPS3, RPL38, RPL37, RPS2, RPL15, RPS11, RPS27A, RPL18, RPS13, RPL19, EIF5B, RPS7, RPL36A-HNRNPH2, RPS8, RPL23, RPS6, RPL13A, RPS3A, RPL23A, EEF1A1, RPS28, RPS29, RPL37A, EIF3H, RPL27, RPS20, EIF3E, RPS21, RPS24, RPS23
peptide biosynthetic process	1.1667e-28	15.4362	46	RPL5, RPL3, RPL32, RPL10, RPLP1, RPL12, RPL11, RPL10A, RPL6, EEF1B2, RPS4X, RPS17, RPS16, RPS15A, RPL36AL, RACK1, RPS3, RPL38, RPL37, RPS2, RPL15, RPS11, RPS27A, RPL18, RPS13, RPL19, EIF5B, RPS7, RPL36A-HNRNPH2, RPS8, RPL23, RPS6, RPL13A, RPS3A, RPL23A, EEF1A1, RPS28, RPS29, RPL37A, EIF3H, RPL27, RPS20, EIF3E, RPS21, RPS24, RPS23
peptide metabolic process	1.5979e-25	13.0312	46	RPL5, RPL3, RPL32, RPL10, RPLP1, RPL12, RPL11, RPL10A, RPL6, EEF1B2, RPS4X, RPS17, RPS16, RPS15A, RPL36AL, RACK1, RPS3, RPL38, RPL37, RPS2, RPL15, RPS11, RPS27A, RPL18, RPS13, RPL19, EIF5B, RPS7, RPL36A-HNRNPH2, RPS8, RPL23, RPS6, RPL13A, RPS3A, RPL23A, EEF1A1, RPS28, RPS29, RPL37A, EIF3H, RPL27, RPS20, EIF3E, RPS21, RPS24, RPS23
amide biosynthetic process	1.5979e-25	12.9577	46	RPL5, RPL3, RPL32, RPL10, RPLP1, RPL12, RPL11, RPL10A, RPL6, EEF1B2, RPS4X, RPS17, RPS16, RPS15A, RPL36AL, RACK1, RPS3, RPL38, RPL37, RPS2, RPL15, RPS11, RPS27A, RPL18, RPS13, RPL19, EIF5B, RPS7, RPL36A-HNRNPH2, RPS8, RPL23, RPS6, RPL13A, RPS3A, RPL23A, EEF1A1, RPS28, RPS29, RPL37A, EIF3H, RPL27, RPS20, EIF3E, RPS21, RPS24, RPS23
gene expression	4.7335e-21	6.47619	68	RPL5, EHF, AHCYL1, RPL3, RPL32, RPLP1, RPL10A, RPL6, EEF1B2, RPS4X, LGALS3, RPS17, RPS16, RPL36AL, RACK1, UBTF, RPL38, RPL37, RPS11, RPS13, EIF5B, RPS7, RPL36A-HNRNPH2, RPS8, RPL23, RPS6, RPL13A, RPS3A, EEF1A1, THRAP3, NCL, RPL37A, LUC7L3, RPL27, RPL26, PABPC1, ATF4, RPL10, RPL12, RPL11, SAMHD1, HIF1A, RPS15A, TPR, RPS3, RPS2, RPL15, RPS27A, RPL18, RPL19, RTRAF, SSB, RIOK3, RPL23A, RPS25, RPS28, …
cellular amide metabolic process	4.7335e-21	9.85325	47	RPL5, RPL3, RPL32, RPL10, RPLP1, RPL12, RPL11, RPL10A, RPL6, EEF1B2, RPS4X, RPS17, RPS16, RPS15A, RPL36AL, RACK1, RPS3, RPL38, RPL37, RPS2, RPL15, RPS11, RPS27A, RPL18, RPS13, RPL19, EIF5B, RPS7, RPL36A-HNRNPH2, RPS8, RPL23, RPS6, RPL13A, RPS3A, RPL23A, EEF1A1, RPS28, RPS29, RPL37A, EIF3H, RPL27, RPS20, EIF3E, RPS21, RPS24, ATF4, RPS23
cellular macromolecule biosynthetic process	1.5087e-18	6.92588	57	RPL5, EHF, RPL3, HSP90AB1, RPL32, RPLP1, RPL10A, RPL6, EEF1B2, RPS4X, RPS17, RPS16, CHAF1A, RPL36AL, RACK1, UBTF, RPL38, RPL37, RPS11, RPS13, EIF5B, SUPT16H, RPS7, RPL36A-HNRNPH2, RPS8, RPL23, RPS6, RPL13A, RPS3A, EEF1A1, RPL37A, RPL27, ATF4, RPL10, RPL12, RPL11, SAMHD1, HIF1A, RPS15A, RPS3, RPS2, RPL15, RPS27A, RPL18, RPL19, RPL23A, SSRP1, RPS28, RPS29, PPP1R1B, TCEA1, EIF3H, RPS20, EIF3E, RPS21…
macromolecule biosynthetic process	3.7519e-18	6.77765	57	RPL5, EHF, RPL3, HSP90AB1, RPL32, RPLP1, RPL10A, RPL6, EEF1B2, RPS4X, RPS17, RPS16, CHAF1A, RPL36AL, RACK1, UBTF, RPL38, RPL37, RPS11, RPS13, EIF5B, SUPT16H, RPS7, RPL36A-HNRNPH2, RPS8, RPL23, RPS6, RPL13A, RPS3A, EEF1A1, RPL37A, RPL27, ATF4, RPL10, RPL12, RPL11, SAMHD1, HIF1A, RPS15A, RPS3, RPS2, RPL15, RPS27A, RPL18, RPL19, RPL23A, SSRP1, RPS28, RPS29, PPP1R1B, TCEA1, EIF3H, RPS20, EIF3E, RPS21…
cellular nitrogen compound biosynthetic process	1.301e-17	6.70659	56	RPL5, EHF, RPL3, HSP90AB1, RPL32, RPLP1, RPL10A, SAT1, RPL6, EEF1B2, RPS4X, RPS17, RPS16, RPL36AL, RACK1, UBTF, RPL38, RPL37, RPS11, RPS13, EIF5B, RPS7, RPL36A-HNRNPH2, RPS8, RPL23, RPS6, RPL13A, RPS3A, EEF1A1, RPL37A, RPL27, ATF4, PRPS2, RPL10, RPL12, RPL11, SAMHD1, RPS15A, RPS3, RPS2, RPL15, RPS27A, RPL18, RPL19, RPL23A, ATP5F1C, RPS28, RPS29, PPP1R1B, TCEA1, EIF3H, RPS20, EIF3E, RPS21, RPS24, …
organonitrogen compound biosynthetic process	1.9227e-14	6.33714	50	RPL5, RPL3, RPL32, RPLP1, RPL10A, SAT1, RPL6, EEF1B2, RPS4X, RPS17, RPS16, RPL36AL, RACK1, RPL38, RPL37, RPS11, RPS13, EIF5B, RPS7, RPL36A-HNRNPH2, RPS8, RPL23, RPS6, RPL13A, RPS3A, EEF1A1, RPL37A, RPL27, RPL10, RPL12, RPL11, HIF1A, RPS15A, RPS3, RPS2, RPL15, RPS27A, RPL18, RPL19, RPL23A, ATP5F1C, RPS28, RPS29, EIF3H, RPS20, EIF3E, CDO1, RPS21, RPS24, RPS23
organic substance biosynthetic process	1.2372e-13	4.71831	67	RPL5, EHF, RPL3, HSP90AB1, RPL32, RPLP1, RPL10A, SAT1, RPL6, EEF1B2, RPS4X, RPS17, RPS16, CHAF1A, RPL36AL, RACK1, UBTF, RPL38, RPL37, RPS11, NANS, RPS13, EIF5B, SUPT16H, RPS7, RPL36A-HNRNPH2, HMGCS1, RPS8, RPL23, RPS6, AKR1A1, SORD, RPL13A, RPS3A, EEF1A1, RPL37A, RPL27, SLC27A5, ATF4, PRPS2, RPL10, RPL12, RPL11, MAT2B, SAMHD1, HIF1A, RPS15A, RPS3, RPS2, RPL15, RPS27A, RPL18, RPL19, RPL23A, SSRP1,…
biosynthetic process	2.362e-13	4.5977	68	RPL5, EHF, RPL3, HSP90AB1, RPL32, RPLP1, RPL10A, SAT1, RPL6, EEF1B2, RPS4X, RPS17, RPS16, CHAF1A, RPL36AL, RACK1, UBTF, RPL38, RPL37, RPS11, NANS, RPS13, EIF5B, SUPT16H, RPS7, RPL36A-HNRNPH2, HMGCS1, RPS8, RPL23, GPT2, RPS6, AKR1A1, SORD, RPL13A, RPS3A, EEF1A1, RPL37A, RPL27, SLC27A5, ATF4, PRPS2, RPL10, RPL12, RPL11, MAT2B, SAMHD1, HIF1A, RPS15A, RPS3, RPS2, RPL15, RPS27A, RPL18, RPL19, RPL23A, …
cellular nitrogen compound metabolic process	5.2217e-13	4.12869	77	RPL5, EHF, AHCYL1, RPL3, HSP90AB1, RPL32, RPLP1, RPL10A, SAT1, RPL6, EEF1B2, RPS4X, LGALS3, RPS17, RPS16, CHAF1A, RPL36AL, RACK1, UBTF, RPL38, RPL37, RPS11, RPS13, EIF5B, SUPT16H, RPS7, RPL36A-HNRNPH2, RPS8, RPL23, RPS6, RPL13A, RPS3A, EEF1A1, THRAP3, NCL, RPL37A, LUC7L3, RPL27, RPL26, PABPC1, GNE, ATF4, PRPS2, RPL10, RPL12, RPL11, SAMHD1, RPS15A, RPS3, RPS2, RPL15, RPS27A, RPL18, RPL19, RTRAF, S…
cellular biosynthetic process	1.15e-12	4.64779	64	RPL5, EHF, RPL3, HSP90AB1, RPL32, RPLP1, RPL10A, SAT1, RPL6, EEF1B2, RPS4X, RPS17, RPS16, CHAF1A, RPL36AL, RACK1, UBTF, RPL38, RPL37, RPS11, RPS13, EIF5B, SUPT16H, RPS7, RPL36A-HNRNPH2, RPS8, RPL23, RPS6, AKR1A1, RPL13A, RPS3A, EEF1A1, RPL37A, RPL27, SLC27A5, ATF4, PRPS2, RPL10, RPL12, RPL11, MAT2B, SAMHD1, HIF1A, RPS15A, RPS3, RPS2, RPL15, RPS27A, RPL18, RPL19, RPL23A, SSRP1, ATP5F1C, RPS28, RPS…
cytoplasmic translation	8.5497e-08	32.1429	9	RPS28, RPS29, EIF3H, RPL38, EIF3E, RPL18, RPS21, RPL6, RPS23
cellular metabolic process	1.2362e-06	2.5464	118	RPL5, EHF, AHCYL1, RPL3, PANK3, RPL32, RPL10A, PHB2, SAT1, RPL6, EEF1B2, LGALS3, RPS17, RPS16, SLK, RPL36AL, RPL38, RPL37, RPS11, RPS13, GABARAPL2, BNIP3L, USP8, SUPT16H, PHYH, TSTD1, RPS7, RPL36A-HNRNPH2, RPS8, RPL23, GPT2, RPS6, EEF1A1, NCL, CHMP4B, RPL27, RPL26, UBE2V1, EZR, SLC27A5, GNE, ATF4, HIF1A, LDHB, PRDX2, HSPA8, FN1, ACADSB, RPS25, RPS28, SNW1, RPS29, PPP1R1B, GNAS, RPS20, RPS21, RPS2…
cellular macromolecule metabolic process	0.00011626	2.72944	80	RPL5, EHF, RPL3, HSP90AB1, RPL32, MAST4, RPLP1, RPL10A, RPL6, EEF1B2, RPS4X, TRMT112, RPS17, RPS16, CHAF1A, SLK, RPL36AL, SUMO2, RACK1, UBTF, RPL38, RPL37, RPS11, RPS13, PCMTD1, DSP, BNIP3L, USP8, EIF5B, SUPT16H, ANXA1, RPS7, RPL36A-HNRNPH2, RPS8, RPL23, RPS6, RPL13A, RPS3A, EEF1A1, PTP4A2, THRAP3, RPL37A, CHMP4B, RPL27, UBE2V1, EZR, ATF4, PRPS2, RPL10, RPL12, RPL11, SAMHD1, HIF1A, RPS15A, ERBB3,…
actin filament-based process	0.00011626	6.25	19	ANXA1, ACTN1, ACTN4, WASL, CD2AP, EPS8, SLC9A3R1, SCIN, DAAM1, MYO6, CFL1, TRIP10, PLS3, RAC1, LCP1, EZR, TMSB10, PFN2, PHACTR4
metabolic process	0.00016817	2.30483	124	RPL5, EHF, AHCYL1, RPL3, PANK3, RPL32, RPL10A, PHB2, SAT1, RPL6, EEF1B2, LGALS3, RPS17, RPS16, SLK, RPL36AL, RPL38, RPL37, CAPN1, RPS11, RPS13, GABARAPL2, BNIP3L, USP8, SUPT16H, PHYH, TSTD1, RPS7, RPL36A-HNRNPH2, RPS8, RPL23, GPT2, RPS6, EEF1A1, NCL, CHMP4B, RPL27, RPL26, LAP3, UBE2V1, EZR, SLC27A5, GNE, ATF4, HIF1A, LDHB, PRDX2, TPR, HSPA8, FN1, ACADSB, RPS25, RPS28, SNW1, RPS29, PPP1R1B, GNAS, …
ribonucleoprotein complex biogenesis	0.00033129	8.22785	13	HSP90AB1, RIOK3, RPLP0, RPS6, RPS25, RPS28, LUC7L3, EIF3H, RPL38, RPL27, EIF3E, RPL26, CUL4B
macromolecule metabolic process	0.00035241	2.48756	95	RPL5, EHF, AHCYL1, RPL3, HSP90AB1, RPL32, MAST4, RPLP1, RPL10A, RPL6, EEF1B2, RPS4X, LGALS3, TRMT112, RPS17, RPS16, CHAF1A, SLK, RPL36AL, SUMO2, RACK1, UBTF, RPL38, RPL37, CAPN1, RPS11, RPS13, PCMTD1, DSP, BNIP3L, USP8, EIF5B, SUPT16H, ANXA1, RPS7, RPL36A-HNRNPH2, RPS8, RPL23, RPS6, RPL13A, RPS3A, EEF1A1, PTP4A2, THRAP3, NCL, RPL37A, CHMP4B, LUC7L3, RPL27, RPL26, LAP3, PABPC1, UBE2V1, EZR, ATF4, …
cellular protein metabolic process	0.00073519	2.83401	63	RPL5, RPL3, RPL32, MAST4, RPLP1, RPL10A, RPL6, EEF1B2, RPS4X, TRMT112, RPS17, RPS16, SLK, RPL36AL, SUMO2, RACK1, RPL38, RPL37, RPS11, RPS13, PCMTD1, DSP, BNIP3L, USP8, EIF5B, ANXA1, RPS7, RPL36A-HNRNPH2, RPS8, RPL23, RPS6, RPL13A, RPS3A, EEF1A1, PTP4A2, RPL37A, CHMP4B, RPL27, UBE2V1, PRPS2, RPL10, RPL12, RPL11, RPS15A, ERBB3, RPS3, RPS2, RPL15, RPS27A, RPL18, RPL19, RIOK3, FN1, RPL23A, RPS28, RPS…
nitrogen compound metabolic process	0.00078975	2.38318	102	RPL5, EHF, AHCYL1, RPL3, RPL32, RPL10A, SAT1, RPL6, EEF1B2, LGALS3, RPS17, RPS16, SLK, RPL36AL, RPL38, RPL37, CAPN1, RPS11, RPS13, BNIP3L, USP8, SUPT16H, RPS7, RPL36A-HNRNPH2, RPS8, RPL23, GPT2, RPS6, EEF1A1, NCL, CHMP4B, RPL27, RPL26, LAP3, UBE2V1, GNE, ATF4, HIF1A, HSPA8, FN1, ACADSB, RPS25, RPS28, SNW1, RPS29, PPP1R1B, GNAS, RPS20, RPS21, RPS24, RPS23, HSP90AB1, MAST4, RPLP1, AKR1B1, RPS4X, TR…
organic substance metabolic process	0.00085958	2.28719	115	RPL5, EHF, AHCYL1, RPL3, RPL32, RPL10A, SAT1, RPL6, EEF1B2, LGALS3, RPS17, RPS16, SLK, RPL36AL, RPL38, RPL37, CAPN1, RPS11, RPS13, BNIP3L, USP8, SUPT16H, PHYH, RPS7, RPL36A-HNRNPH2, RPS8, RPL23, GPT2, RPS6, EEF1A1, NCL, CHMP4B, RPL27, RPL26, LAP3, UBE2V1, EZR, SLC27A5, GNE, ATF4, HIF1A, LDHB, TPR, HSPA8, FN1, ACADSB, RPS25, RPS28, SNW1, RPS29, PPP1R1B, GNAS, RPS20, RPS21, RPS24, RPS23, HSP90AB1, …
primary metabolic process	0.00091046	2.32211	109	RPL5, EHF, AHCYL1, RPL3, RPL32, RPL10A, RPL6, EEF1B2, LGALS3, RPS17, RPS16, SLK, RPL36AL, RPL38, RPL37, CAPN1, RPS11, RPS13, BNIP3L, USP8, SUPT16H, PHYH, RPS7, RPL36A-HNRNPH2, RPS8, RPL23, GPT2, RPS6, EEF1A1, NCL, CHMP4B, RPL27, RPL26, LAP3, UBE2V1, SLC27A5, GNE, ATF4, HIF1A, LDHB, HSPA8, FN1, ACADSB, RPS25, RPS28, SNW1, RPS29, PPP1R1B, GNAS, RPS20, RPS21, RPS24, RPS23, HSP90AB1, MAST4, RPLP1, AK…
actin cytoskeleton organization	0.0011946	5.94796	16	ANXA1, ACTN1, WASL, CD2AP, EPS8, SLC9A3R1, DAAM1, CFL1, TRIP10, PLS3, RAC1, LCP1, EZR, TMSB10, PFN2, PHACTR4
ribosome biogenesis	0.0015257	10.3448	9	RPS25, RPS28, RIOK3, RPLP0, RPS6, RPL38, RPL27, RPL26, CUL4B
regulation of protein-containing complex assembly	0.002007	5.9761	15	CDKN1B, NUMA1, RIOK3, RDX, RPL13A, WASL, MPP7, EPS8, LGALS3, NIN, SCIN, RACK1, SOX9, RAC1, LCP1
positive regulation of embryonic development	0.0024519	36.3636	4	CFL1, RACK1, PLCB1, AMOT
intracellular transport	0.0025131	4.20315	24	COPB2, HSPA8, AHCYL1, CCDC186, SSB, YWHAB, CLTC, RAB27A, CLTA, ACTN4, ATP5F1C, SRP14, PHB2, HIF1A, COPZ1, BICD2, SLC9A3R1, NPC2, MYO6, HNRNPA2B1, TPR, TXNIP, CHMP4B, HNRNPA1
cytoskeleton organization	0.0029221	4.05844	25	NUMA1, WASL, EPS8, SLC9A3R1, SLK, CFL1, PLS3, SOX9, RAC1, TMSB10, PHACTR4, DSP, ANXA1, ACTN1, CD2AP, NIN, STAG2, KRT18, DAAM1, TRIP10, LCP1, CCDC66, EZR, PHLDB2, PFN2
cell cycle	0.0053149	4.09253	23	USP8, CDKN1B, NUMA1, RPS6, WASL, PHB2, EPS8, NIN, STAG2, CHAF1A, CDK4, CFL1, TPR, RACK1, RPS3, TXNIP, CHMP4B, ERH, RPL26, IRF6, EZR, PLCB1, NKX3-1
regulation of translation	0.0058263	6.41711	12	RPS4X, EIF5B, RPL10, TPR, RACK1, RPS3, NOLC1, EIF4EBP2, RPL13A, RPL38, RPL26, EEF2
ribosomal small subunit biogenesis	0.0058263	28.5714	4	RPS25, RIOK3, RPS6, RPL38
positive regulation of protein-containing complex assembly	0.0058263	7.57576	10	LGALS3, NIN, CDKN1B, SCIN, NUMA1, RACK1, WASL, RAC1, LCP1, MPP7
supramolecular fiber organization	0.0058263	5.62249	14	DSP, HSP90AB1, NUMA1, ACTN1, WASL, CD2AP, EPS8, NIN, SLK, CFL1, PLS3, LCP1, EZR, TMSB10
posttranscriptional regulation of gene expression	0.0061791	5.57769	14	EIF5B, RPL10, NOLC1, RPL13A, EEF2, RPS4X, THRAP3, HNRNPA2B1, TPR, RACK1, RPS3, EIF4EBP2, RPL38, RPL26
cellular localization	0.0062927	3.17324	37	COPB2, AHCYL1, CCDC186, NUMA1, YWHAB, CLTC, RPL11, CLTA, WASL, SRP14, PHB2, HIF1A, BICD2, AMOT, SLC9A3R1, SCIN, MYO6, CFL1, TPR, SOX9, RAC1, HNRNPA1, HSPA8, SSB, RDX, RAB27A, ACTN4, ATP5F1C, COPZ1, NIN, KRT18, NPC2, HNRNPA2B1, TXNIP, CHMP4B, EZR, VCL
intracellular protein transport	0.010859	4.79042	16	COPB2, HSPA8, AHCYL1, SSB, YWHAB, CLTC, RAB27A, CLTA, SRP14, PHB2, COPZ1, MYO6, HNRNPA2B1, TPR, TXNIP, CHMP4B
actin filament bundle assembly	0.011106	16.129	5	EPS8, ACTN1, PLS3, LCP1, EZR
actin filament bundle organization	0.011106	16.129	5	EPS8, ACTN1, PLS3, LCP1, EZR
establishment of localization in cell	0.01401	3.4749	27	COPB2, AHCYL1, CCDC186, NUMA1, YWHAB, CLTC, CLTA, SRP14, PHB2, HIF1A, BICD2, SLC9A3R1, MYO6, CFL1, TPR, HNRNPA1, HSPA8, SSB, RAB27A, ACTN4, ATP5F1C, COPZ1, NPC2, HNRNPA2B1, TXNIP, CHMP4B, EZR
positive regulation of microtubule polymerization	0.01401	22.2222	4	NIN, CDKN1B, NUMA1, RAC1
regulation of gene expression	0.014162	2.45115	69	EHF, HSP90AB1, ATN1, ADIRF, WASL, PHB2, RPS4X, TRMT112, RACK1, RPL38, SOX9, RAC1, RPS13, NKX3-1, EIF5B, ANXA1, RPL23, ACTN1, RPL13A, ACTN4, CD2AP, THRAP3, NCL, TXNIP, RPL26, PABPC1, UBE2V1, IRF6, EZR, PLCB1, ATF4, PRPS2, RPL10, SATB1, NOLC1, GATA2, NDRG2, HIF1A, BARX2, HSPD1, PRDX2, ERBB3, MYO6, TPR, RPS3, SPP1, EIF4EBP2, SAP18, HNRNPA1, CRYM, RTRAF, HSPA8, SSB, STAT1, RIOK3, ZBTB16, CNBP, RDX, F…
cellular process	0.014162	1.81802	206	RPL5, EHF, AHCYL1, RPL3, PANK3, RPL32, PHB2, RPL6, EPS8, LGALS3, RPS17, RPS16, RPL36AL, RPL38, RPL37, SOX9, RPS11, RPS13, GABARAPL2, TSTD1, RPL23, ACTN1, KRT8, ACTN4, CD2AP, DAAM1, LRATD1, TXNIP, RPL27, VDAC1, RPL26, EZR, GNE, PFN2, ATF4, BEX4, PDE1C, NOLC1, GATA2, HIF1A, ABR, LDHB, PRDX2, CD79A, MYO6, ATP6V1C2, RDX, FN1, RAB27A, NR1D2, ACADSB, RPS25, RPS28, SNW1, STAG2, RPS29, PPP1R1B, RPS20, RP…
protein metabolic process	0.01479	2.46686	67	RPL5, RPL3, RPL32, MAST4, RPLP1, RPL10A, RPL6, EEF1B2, RPS4X, TRMT112, RPS17, RPS16, SLK, RPL36AL, SUMO2, RACK1, RPL38, RPL37, CAPN1, RPS11, RPS13, PCMTD1, DSP, BNIP3L, USP8, EIF5B, ANXA1, RPS7, RPL36A-HNRNPH2, RPS8, RPL23, RPS6, RPL13A, RPS3A, EEF1A1, PTP4A2, RPL37A, CHMP4B, RPL27, LAP3, UBE2V1, PRPS2, RPL10, RPL12, RPL11, HIF1A, RPS15A, ERBB3, RPS3, RPS2, RPL15, RPS27A, RPL18, RPL19, HSPA8, RIO…
translational elongation	0.01568	21.0526	4	EEF1B2, EEF1A1, RPLP1, RACK1
protein refolding	0.01568	37.5	3	HSPA8, DNAJA2, HSPD1
negative regulation of translational initiation	0.01568	37.5	3	TPR, EIF4EBP2, RPL13A
cellular response to chemical stimulus	0.01568	2.83081	43	AHCYL1, RPL3, CDKN1B, HSP90AB1, CCDC186, RPLP0, ADIRF, AKR1B1, SLC41A1, ATP1A1, HIF1A, HSPD1, EPS8, LGALS3, PRDX2, SLC9A3R1, RPS16, TPR, RACK1, SPP1, EIF4EBP2, SOX9, HNRNPA1, NKX3-1, BNIP3L, ANXA1, STAT1, RIOK3, RPL23, GPX6, RPS6, KRT8, AKR1A1, ACTN4, EEF1A1, KRT18, CDK4, NCL, GNAS, PDCD4, EZR, PLCB1, ATF4
actin filament organization	0.016821	7.03125	9	EPS8, ACTN1, CFL1, PLS3, WASL, LCP1, EZR, TMSB10, CD2AP
cellular protein localization	0.019248	3.48675	25	COPB2, AHCYL1, YWHAB, CLTC, RPL11, CLTA, WASL, SRP14, PHB2, AMOT, SCIN, MYO6, TPR, SOX9, HSPA8, SSB, RDX, RAB27A, COPZ1, KRT18, HNRNPA2B1, TXNIP, CHMP4B, EZR, VCL
cellular macromolecule localization	0.019973	3.47222	25	COPB2, AHCYL1, YWHAB, CLTC, RPL11, CLTA, WASL, SRP14, PHB2, AMOT, SCIN, MYO6, TPR, SOX9, HSPA8, SSB, RDX, RAB27A, COPZ1, KRT18, HNRNPA2B1, TXNIP, CHMP4B, EZR, VCL
positive regulation of NIK/NF-kappaB signaling	0.019973	13.5135	5	PRPS2, TCIM, PDCD4, ACTN4, PHB2
cellular response to interleukin-4	0.020023	19.0476	4	RPL3, HSP90AB1, CDK4, RPLP0
negative regulation of transforming growth factor beta production	0.020023	33.3333	3	HSP90AB1, FN1, CD2AP
ncRNA processing	0.020023	6.76692	9	RPS25, SSB, RIOK3, HNRNPA2B1, RPS6, RPL27, RPL26, POLR3K, RTRAF
epithelial cell development	0.021797	6.66667	9	SLC9A3R1, RAB25, RDX, AKR1B1, SOX9, EZR, HIF1A, GRHL2, ATF4
regulation of cellular amide metabolic process	0.021797	5.26316	12	RPS4X, EIF5B, RPL10, TPR, RACK1, RPS3, NOLC1, EIF4EBP2, RPL13A, RPL38, RPL26, EEF2
negative regulation of gene expression	0.021806	2.97619	35	HSP90AB1, SATB1, ATN1, GATA2, NDRG2, PHB2, HIF1A, BARX2, TPR, EIF4EBP2, SAP18, SOX9, RAC1, CRYM, RPS13, NKX3-1, HSPA8, ANXA1, SSB, RPL23, ZBTB16, CNBP, FN1, RPL13A, CD2AP, PNRC2, THRAP3, HNRNPA2B1, BHLHE40, PDCD4, TXNIP, PABPC1, EZR, PLCB1, ATF4
positive regulation of microtubule polymerization or depolymerization	0.021806	18.1818	4	NIN, CDKN1B, NUMA1, RAC1
cellular component biogenesis	0.021806	2.96862	35	HSP90AB1, NUMA1, RPLP0, WASL, SAMHD1, EPS8, SLC9A3R1, CHAF1A, UBTF, PLS3, RPL38, SOX9, RAC1, RIOK3, ACTN1, RPS6, FN1, RAB27A, EMP1, GRHL2, MPP7, RPS25, RPS28, NIN, STAG2, CHMP4B, LUC7L3, EIF3H, RPL27, EIF3E, RPL26, LCP1, EZR, VCL, CUL4B
protein localization	0.021806	3.11245	31	COPB2, AHCYL1, CCDC186, YWHAB, CLTC, RPL11, CLTA, WASL, SRP14, PHB2, AMOT, SCIN, MYO6, TPR, SOX9, DSP, HSPA8, SSB, RDX, RAB27A, COPZ1, MPP7, ARCN1, NIN, KRT18, HNRNPA2B1, TXNIP, CHMP4B, EZR, PHLDB2, VCL
RNA processing	0.022254	4.30108	16	AHCYL1, SSB, RIOK3, RPS6, LGALS3, RPS25, SNW1, THRAP3, NCL, HNRNPA2B1, LUC7L3, RPL27, RPL26, PABPC1, POLR3K, RTRAF
regulation of cellular component biogenesis	0.022826	3.69069	21	CDKN1B, NUMA1, RIOK3, RDX, RPL13A, WASL, MPP7, EPS8, LGALS3, NIN, SLK, SCIN, TPR, RACK1, CHMP4B, SOX9, RAC1, LCP1, EZR, PHLDB2, VCL
response to interleukin-4	0.02477	17.3913	4	RPL3, HSP90AB1, CDK4, RPLP0
cell cycle process	0.026191	3.94737	18	USP8, CDKN1B, NUMA1, RPS6, WASL, PHB2, EPS8, NIN, STAG2, CDK4, CFL1, TPR, CHMP4B, RPL26, IRF6, EZR, PLCB1, NKX3-1
cellular response to organic substance	0.032029	2.92347	34	AHCYL1, RPL3, CDKN1B, HSP90AB1, CCDC186, RPLP0, ATP1A1, HIF1A, HSPD1, EPS8, SLC9A3R1, RPS16, TPR, RACK1, SPP1, EIF4EBP2, SOX9, NKX3-1, ANXA1, STAT1, RIOK3, RPL23, RPS6, KRT8, ACTN4, EEF1A1, KRT18, CDK4, NCL, GNAS, PDCD4, EZR, PLCB1, ATF4
cellular response to cytokine stimulus	0.032029	3.99061	17	RPL3, HSP90AB1, STAT1, RPLP0, KRT8, ACTN4, HIF1A, HSPD1, EPS8, RPS16, KRT18, CDK4, NCL, TPR, SOX9, PLCB1, NKX3-1
regulation of RNA splicing	0.032029	9.23077	6	HSPA8, THRAP3, HNRNPA2B1, SAP18, HNRNPA1, RPS13
regulation of embryonic development	0.034488	11.3636	5	CFL1, RACK1, PLCB1, PHLDB2, AMOT
daunorubicin metabolic process	0.035124	66.6667	2	AKR1A1, AKR1B1
doxorubicin metabolic process	0.035124	66.6667	2	AKR1A1, AKR1B1
cellular potassium ion homeostasis	0.035124	66.6667	2	ATP1A1, ATP1B1
polyketide metabolic process	0.035124	66.6667	2	AKR1A1, AKR1B1
aminoglycoside antibiotic metabolic process	0.035124	66.6667	2	AKR1A1, AKR1B1
organelle localization	0.037467	4.8	12	SLC9A3R1, NIN, AHCYL1, CCDC186, NUMA1, CFL1, CHMP4B, ACTN4, WASL, EZR, HIF1A, BICD2
epithelial cell differentiation	0.037467	4.34783	14	DSP, EHF, RDX, AKR1B1, HIF1A, GRHL2, LGALS3, SLC9A3R1, RAB25, TXNIP, SOX9, IRF6, EZR, ATF4
neural crest cell development	0.037623	10.8696	5	FN1, NOLC1, SOX9, HIF1A, PHACTR4
regulation of mRNA splicing, via spliceosome	0.037623	10.8696	5	HSPA8, THRAP3, HNRNPA2B1, SAP18, HNRNPA1
response to epidermal growth factor	0.038002	14.8148	4	EEF1A1, NCL, TPR, SOX9
regulation of mRNA processing	0.040171	8.57143	6	HSPA8, AHCYL1, THRAP3, HNRNPA2B1, SAP18, HNRNPA1
regulation of macromolecule metabolic process	0.040171	2.20878	84	EHF, AHCYL1, HSP90AB1, YWHAB, RPLP1, ATN1, ADIRF, WASL, PHB2, RPS4X, TRMT112, FAM162A, SUMO2, RACK1, RPL38, SOX9, RAC1, RPS13, NKX3-1, PHACTR4, EIF5B, ANXA1, RPL23, ACTN1, RPL13A, ACTN4, CD2AP, THRAP3, NCL, TXNIP, WFDC10A, RPL26, PABPC1, UBE2V1, IRF6, EZR, PLCB1, ATF4, BEX4, PRPS2, RPL10, SATB1, RPL11, NOLC1, GATA2, NDRG2, HIF1A, BARX2, HSPD1, PRDX2, SLC9A3R1, ERBB3, MYO6, TPR, RPS3, SPP1, EIF4EB…
regulation of transforming growth factor beta production	0.042208	14.2857	4	HSP90AB1, FN1, HIF1A, CD2AP
mesenchymal cell development	0.046826	10.2041	5	FN1, NOLC1, SOX9, HIF1A, PHACTR4
regulation of epithelial cell differentiation	0.046826	7.07071	7	CDKN1B, NUMA1, STAT1, SOX9, PLCB1, GRHL2, VCL
organonitrogen compound metabolic process	0.049195	2.25023	75	RPL5, RPL3, RPL32, MAST4, RPLP1, RPL10A, SAT1, RPL6, EEF1B2, RPS4X, TRMT112, RPS17, RPS16, SLK, RPL36AL, SUMO2, RACK1, RPL38, RPL37, CAPN1, RPS11, RPS13, PCMTD1, DSP, BNIP3L, USP8, EIF5B, ANXA1, RPS7, RPL36A-HNRNPH2, RPS8, RPL23, GPT2, RPS6, RPL13A, RPS3A, EEF1A1, PTP4A2, RPL37A, CHMP4B, RPL27, LAP3, UBE2V1, ATF4, PRPS2, RPL10, RPL12, RPL11, SAMHD1, HIF1A, RPS15A, ERBB3, RPS3, RPS2, RPL15, RPS27A…
