# Supplementary material for: Characterization of the Impact of Density Gradient Centrifugation on the Profile of the Pig Sperm Transcriptome by RNA-Seq
Source: Front Vet Sci. 2021 Jul 19;8:668158. doi: 10.3389/fvets.2021.668158 (PMC8326511; doi:10.3389/fvets.2021.668158)
Supplement: Supplementary Table 9 — List of differentially abundant genes when including the four ejaculates and when removing the ejaculates B1, B2, B3, or B4. The second row shows the number of DAGs identified in that analyses. Down, gene showing significantly decreased RNAs levels in P when compared to NP. Up, gene showing significantly increased RNAs levels in P when compared to NP. [file Table_9.xlsx]

## Sheet: Sheet1
Test	DAGs with average FPKM ≥ 1	DAGs with average FPKM ≥ 10
With all 4 samples	372	83
Removed ejaculate B1	272	77
Removed ejaculate B2	302	84
Removed ejaculate B3	329	99
Removed ejaculate B4	170	81
