# Supplementary material for: Characterization of the Impact of Density Gradient Centrifugation on the Profile of the Pig Sperm Transcriptome by RNA-Seq
Source: Front Vet Sci. 2021 Jul 19;8:668158. doi: 10.3389/fvets.2021.668158 (PMC8326511; doi:10.3389/fvets.2021.668158)
Supplement: Supplementary Table 10 — List of tissue-specific or nearly tissue-specific genes for pig epididymis, lymph node, tonsil, duodenum and skeletal muscle and for human prostate, testis, EBV transformed lymphocytes, whole blood, liver, and nerve tibial that are also present in the pig sperm. The last column shows whether that particular gene belonged to the DAG or the non-DAG group. [file Table_10.xlsx]

## Sheet: Sheet1
Source file	Tissue type	Tissue of specific expression	gene	DAG / nonDAG group
E-MTAB-5895 pig tissues	male reproductive organ	epididymis	BSP1	DAG
E-MTAB-5895 pig tissues	male reproductive organ	epididymis	DEFB115	DAG
E-MTAB-5895 pig tissues	male reproductive organ	epididymis	ENSSSCG00000026271	DAG
E-MTAB-5895 pig tissues	male reproductive organ	epididymis	GPX6	DAG
E-MTAB-5895 pig tissues	male reproductive organ	epididymis	R0SE12	DAG
E-MTAB-5895 pig tissues	male reproductive organ	epididymis	ABCB5	nonDAG
E-MTAB-5895 pig tissues	male reproductive organ	epididymis	ACOXL	nonDAG
E-MTAB-5895 pig tissues	male reproductive organ	epididymis	CES5A	nonDAG
E-MTAB-5895 pig tissues	male reproductive organ	epididymis	CILP2	nonDAG
E-MTAB-5895 pig tissues	male reproductive organ	epididymis	DEFB136	nonDAG
E-MTAB-5895 pig tissues	male reproductive organ	epididymis	DPY19L2	nonDAG
E-MTAB-5895 pig tissues	male reproductive organ	epididymis	ENSSSCG00000007224	nonDAG
E-MTAB-5895 pig tissues	male reproductive organ	epididymis	ENSSSCG00000033649	nonDAG
E-MTAB-5895 pig tissues	male reproductive organ	epididymis	GLRA3	nonDAG
E-MTAB-5895 pig tissues	male reproductive organ	epididymis	LMNTD1	nonDAG
E-MTAB-5895 pig tissues	male reproductive organ	epididymis	MTHFR	nonDAG
E-MTAB-5895 pig tissues	male reproductive organ	epididymis	PRM1	nonDAG
E-MTAB-5895 pig tissues	male reproductive organ	epididymis	UPK3A	nonDAG
E-MTAB-5895 pig tissues	leukocytes	lymph node	FCER2	nonDAG
E-MTAB-5895 pig tissues	leukocytes	tonsil	ENSSSCG00000017445	DAG
E-MTAB-5895 pig tissues	leukocytes	tonsil	ENSSSCG00000045189	DAG
E-MTAB-5895 pig tissues	leukocytes	tonsil	ANKRD35	nonDAG
E-MTAB-5895 pig tissues	leukocytes	tonsil	CRNN	nonDAG
E-MTAB-5895 pig tissues	leukocytes	tonsil	DSG3	nonDAG
E-MTAB-5895 pig tissues	leukocytes	tonsil	ENSSSCG00000026339	nonDAG
E-MTAB-5895 pig tissues	leukocytes	tonsil	KRT4	nonDAG
E-MTAB-5895 pig tissues	leukocytes	tonsil	PAX5	nonDAG
E-MTAB-5895 pig tissues	leukocytes	tonsil	TNFRSF13C	nonDAG
E-MTAB-5895 pig tissues	leukocytes	tonsil	TRIM29	nonDAG
E-MTAB-5895 pig tissues	negative control	duodenum	ENSSSCG00000030013	nonDAG
E-MTAB-5895 pig tissues	negative control	duodenum	SCT	nonDAG
E-MTAB-5895 pig tissues	negative control	skeletal muscle	ACTN3	nonDAG
E-MTAB-5895 pig tissues	negative control	skeletal muscle	CAC01S	nonDAG
E-MTAB-5895 pig tissues	negative control	skeletal muscle	GADL1	nonDAG
E-MTAB-5895 pig tissues	negative control	skeletal muscle	JSRP1	nonDAG
E-MTAB-5895 pig tissues	negative control	skeletal muscle	MYOZ1	nonDAG
E-MTAB-5895 pig tissues	negative control	skeletal muscle	TRIM72	nonDAG
GTEx human tissues	male reproductive organ	prostate	NKX3-1	DAG
GTEx human tissues	male reproductive organ	prostate	KLK4	nonDAG
GTEx human tissues	male reproductive organ	prostate	UPK3A	nonDAG
GTEx human tissues	male reproductive organ	testis	ABHD1	nonDAG
GTEx human tissues	male reproductive organ	testis	ACR	nonDAG
GTEx human tissues	male reproductive organ	testis	ACRV1	nonDAG
GTEx human tissues	male reproductive organ	testis	ACSBG2	nonDAG
GTEx human tissues	male reproductive organ	testis	ACTL10	nonDAG
GTEx human tissues	male reproductive organ	testis	ACTL7A	nonDAG
GTEx human tissues	male reproductive organ	testis	ACTL7B	nonDAG
GTEx human tissues	male reproductive organ	testis	ACTL9	nonDAG
GTEx human tissues	male reproductive organ	testis	ACTRT2	nonDAG
GTEx human tissues	male reproductive organ	testis	ADAD1	nonDAG
GTEx human tissues	male reproductive organ	testis	ADAM2	nonDAG
GTEx human tissues	male reproductive organ	testis	ADAM32	nonDAG
GTEx human tissues	male reproductive organ	testis	ADAM3A	nonDAG
GTEx human tissues	male reproductive organ	testis	ADIG	nonDAG
GTEx human tissues	male reproductive organ	testis	AGBL2	nonDAG
GTEx human tissues	male reproductive organ	testis	AKAP3	nonDAG
GTEx human tissues	male reproductive organ	testis	AKAP4	nonDAG
GTEx human tissues	male reproductive organ	testis	ANKEF1	nonDAG
GTEx human tissues	male reproductive organ	testis	ANKRD7	nonDAG
GTEx human tissues	male reproductive organ	testis	ARMC3	nonDAG
GTEx human tissues	male reproductive organ	testis	ARRDC5	nonDAG
GTEx human tissues	male reproductive organ	testis	ASZ1	nonDAG
GTEx human tissues	male reproductive organ	testis	AXDND1	nonDAG
GTEx human tissues	male reproductive organ	testis	BANF2	nonDAG
GTEx human tissues	male reproductive organ	testis	BCL2L14	nonDAG
GTEx human tissues	male reproductive organ	testis	BOLL	nonDAG
GTEx human tissues	male reproductive organ	testis	BPIFA3	nonDAG
GTEx human tissues	male reproductive organ	testis	BRDT	nonDAG
GTEx human tissues	male reproductive organ	testis	BTG4	nonDAG
GTEx human tissues	male reproductive organ	testis	C10orf62	nonDAG
GTEx human tissues	male reproductive organ	testis	C11orf42	nonDAG
GTEx human tissues	male reproductive organ	testis	C11orf65	nonDAG
GTEx human tissues	male reproductive organ	testis	C11orf94	nonDAG
GTEx human tissues	male reproductive organ	testis	C12orf50	nonDAG
GTEx human tissues	male reproductive organ	testis	C12orf54	nonDAG
GTEx human tissues	male reproductive organ	testis	C16orf78	nonDAG
GTEx human tissues	male reproductive organ	testis	C16orf90	nonDAG
GTEx human tissues	male reproductive organ	testis	C17orf64	nonDAG
GTEx human tissues	male reproductive organ	testis	C1orf185	nonDAG
GTEx human tissues	male reproductive organ	testis	C1orf94	nonDAG
GTEx human tissues	male reproductive organ	testis	C20orf141	nonDAG
GTEx human tissues	male reproductive organ	testis	C2orf73	nonDAG
GTEx human tissues	male reproductive organ	testis	C4orf45	nonDAG
GTEx human tissues	male reproductive organ	testis	C5orf52	nonDAG
GTEx human tissues	male reproductive organ	testis	C9orf131	nonDAG
GTEx human tissues	male reproductive organ	testis	C9orf43	nonDAG
GTEx human tissues	male reproductive organ	testis	CABS1	nonDAG
GTEx human tissues	male reproductive organ	testis	CALR3	nonDAG
GTEx human tissues	male reproductive organ	testis	CATSPER1	nonDAG
GTEx human tissues	male reproductive organ	testis	CATSPERD	nonDAG
GTEx human tissues	male reproductive organ	testis	CCDC150	nonDAG
GTEx human tissues	male reproductive organ	testis	CCDC158	nonDAG
GTEx human tissues	male reproductive organ	testis	CCDC173	nonDAG
GTEx human tissues	male reproductive organ	testis	CCDC179	nonDAG
GTEx human tissues	male reproductive organ	testis	CCDC185	nonDAG
GTEx human tissues	male reproductive organ	testis	CCDC27	nonDAG
GTEx human tissues	male reproductive organ	testis	CCDC33	nonDAG
GTEx human tissues	male reproductive organ	testis	CCDC42	nonDAG
GTEx human tissues	male reproductive organ	testis	CCDC62	nonDAG
GTEx human tissues	male reproductive organ	testis	CCDC70	nonDAG
GTEx human tissues	male reproductive organ	testis	CCDC83	nonDAG
GTEx human tissues	male reproductive organ	testis	CCDC87	nonDAG
GTEx human tissues	male reproductive organ	testis	CCER1	nonDAG
GTEx human tissues	male reproductive organ	testis	CCIN	nonDAG
GTEx human tissues	male reproductive organ	testis	CCT8L2	nonDAG
GTEx human tissues	male reproductive organ	testis	CDKL3	nonDAG
GTEx human tissues	male reproductive organ	testis	CETN1	nonDAG
GTEx human tissues	male reproductive organ	testis	CFAP46	nonDAG
GTEx human tissues	male reproductive organ	testis	CFAP52	nonDAG
GTEx human tissues	male reproductive organ	testis	CFAP77	nonDAG
GTEx human tissues	male reproductive organ	testis	CFAP99	nonDAG
GTEx human tissues	male reproductive organ	testis	CIB4	nonDAG
GTEx human tissues	male reproductive organ	testis	CNBD2	nonDAG
GTEx human tissues	male reproductive organ	testis	CNTD1	nonDAG
GTEx human tissues	male reproductive organ	testis	COX6B2	nonDAG
GTEx human tissues	male reproductive organ	testis	CST8	nonDAG
GTEx human tissues	male reproductive organ	testis	CT83	nonDAG
GTEx human tissues	male reproductive organ	testis	CYLC1	nonDAG
GTEx human tissues	male reproductive organ	testis	DAW1	nonDAG
GTEx human tissues	male reproductive organ	testis	DAZL	nonDAG
GTEx human tissues	male reproductive organ	testis	DDI1	nonDAG
GTEx human tissues	male reproductive organ	testis	DDX4	nonDAG
GTEx human tissues	male reproductive organ	testis	DDX43	nonDAG
GTEx human tissues	male reproductive organ	testis	DEUP1	nonDAG
GTEx human tissues	male reproductive organ	testis	DKKL1	nonDAG
GTEx human tissues	male reproductive organ	testis	DMRT1	nonDAG
GTEx human tissues	male reproductive organ	testis	DMRTB1	nonDAG
GTEx human tissues	male reproductive organ	testis	DMRTC2	nonDAG
GTEx human tissues	male reproductive organ	testis	DNAJB3	nonDAG
GTEx human tissues	male reproductive organ	testis	DNAJB8	nonDAG
GTEx human tissues	male reproductive organ	testis	DNAJC5B	nonDAG
GTEx human tissues	male reproductive organ	testis	DNAJC5G	nonDAG
GTEx human tissues	male reproductive organ	testis	DRC7	nonDAG
GTEx human tissues	male reproductive organ	testis	DUSP21	nonDAG
GTEx human tissues	male reproductive organ	testis	ERICH6	nonDAG
GTEx human tissues	male reproductive organ	testis	EXD1	nonDAG
GTEx human tissues	male reproductive organ	testis	FAM186B	nonDAG
GTEx human tissues	male reproductive organ	testis	FAM187B	nonDAG
GTEx human tissues	male reproductive organ	testis	FAM205C	nonDAG
GTEx human tissues	male reproductive organ	testis	FAM209B	nonDAG
GTEx human tissues	male reproductive organ	testis	FAM221B	nonDAG
GTEx human tissues	male reproductive organ	testis	FAM228A	nonDAG
GTEx human tissues	male reproductive organ	testis	FAM71A	nonDAG
GTEx human tissues	male reproductive organ	testis	FAM71B	nonDAG
GTEx human tissues	male reproductive organ	testis	FAM71D	nonDAG
GTEx human tissues	male reproductive organ	testis	FAM71E2	nonDAG
GTEx human tissues	male reproductive organ	testis	FAM71F1	nonDAG
GTEx human tissues	male reproductive organ	testis	FAM81B	nonDAG
GTEx human tissues	male reproductive organ	testis	FBXL13	nonDAG
GTEx human tissues	male reproductive organ	testis	FBXO24	nonDAG
GTEx human tissues	male reproductive organ	testis	FBXO39	nonDAG
GTEx human tissues	male reproductive organ	testis	FER1L5	nonDAG
GTEx human tissues	male reproductive organ	testis	FHAD1	nonDAG
GTEx human tissues	male reproductive organ	testis	FKBP6	nonDAG
GTEx human tissues	male reproductive organ	testis	FMR1NB	nonDAG
GTEx human tissues	male reproductive organ	testis	FNDC11	nonDAG
GTEx human tissues	male reproductive organ	testis	FNDC8	nonDAG
GTEx human tissues	male reproductive organ	testis	FSCN3	nonDAG
GTEx human tissues	male reproductive organ	testis	FTMT	nonDAG
GTEx human tissues	male reproductive organ	testis	GALNTL5	nonDAG
GTEx human tissues	male reproductive organ	testis	GAPDHS	nonDAG
GTEx human tissues	male reproductive organ	testis	GGN	nonDAG
GTEx human tissues	male reproductive organ	testis	GK2	nonDAG
GTEx human tissues	male reproductive organ	testis	GLIPR1L1	nonDAG
GTEx human tissues	male reproductive organ	testis	GSG1	nonDAG
GTEx human tissues	male reproductive organ	testis	GTSF1	nonDAG
GTEx human tissues	male reproductive organ	testis	GTSF1L	nonDAG
GTEx human tissues	male reproductive organ	testis	HDGFL1	nonDAG
GTEx human tissues	male reproductive organ	testis	HEATR9	nonDAG
GTEx human tissues	male reproductive organ	testis	HMGB4	nonDAG
GTEx human tissues	male reproductive organ	testis	HORMAD1	nonDAG
GTEx human tissues	male reproductive organ	testis	HORMAD2	nonDAG
GTEx human tissues	male reproductive organ	testis	HSF2BP	nonDAG
GTEx human tissues	male reproductive organ	testis	HSF5	nonDAG
GTEx human tissues	male reproductive organ	testis	HSPA1L	nonDAG
GTEx human tissues	male reproductive organ	testis	HSPB9	nonDAG
GTEx human tissues	male reproductive organ	testis	IQCF1	nonDAG
GTEx human tissues	male reproductive organ	testis	IQCF2	nonDAG
GTEx human tissues	male reproductive organ	testis	IQCF5	nonDAG
GTEx human tissues	male reproductive organ	testis	IQUB	nonDAG
GTEx human tissues	male reproductive organ	testis	IRGC	nonDAG
GTEx human tissues	male reproductive organ	testis	IZUMO1	nonDAG
GTEx human tissues	male reproductive organ	testis	IZUMO2	nonDAG
GTEx human tissues	male reproductive organ	testis	KCTD19	nonDAG
GTEx human tissues	male reproductive organ	testis	KIF2B	nonDAG
GTEx human tissues	male reproductive organ	testis	KLF17	nonDAG
GTEx human tissues	male reproductive organ	testis	KLHL10	nonDAG
GTEx human tissues	male reproductive organ	testis	KLHL11	nonDAG
GTEx human tissues	male reproductive organ	testis	LCA5L	nonDAG
GTEx human tissues	male reproductive organ	testis	LDHC	nonDAG
GTEx human tissues	male reproductive organ	testis	LRRC18	nonDAG
GTEx human tissues	male reproductive organ	testis	LRRC36	nonDAG
GTEx human tissues	male reproductive organ	testis	LRRC52	nonDAG
GTEx human tissues	male reproductive organ	testis	LRRC74A	nonDAG
GTEx human tissues	male reproductive organ	testis	LYPD4	nonDAG
GTEx human tissues	male reproductive organ	testis	LYZL4	nonDAG
GTEx human tissues	male reproductive organ	testis	MAEL	nonDAG
GTEx human tissues	male reproductive organ	testis	MAJIN	nonDAG
GTEx human tissues	male reproductive organ	testis	MEIOB	nonDAG
GTEx human tissues	male reproductive organ	testis	MEIOC	nonDAG
GTEx human tissues	male reproductive organ	testis	MGAT4D	nonDAG
GTEx human tissues	male reproductive organ	testis	MMEL1	nonDAG
GTEx human tissues	male reproductive organ	testis	MORN3	nonDAG
GTEx human tissues	male reproductive organ	testis	MPC1L	nonDAG
GTEx human tissues	male reproductive organ	testis	MROH2B	nonDAG
GTEx human tissues	male reproductive organ	testis	MS4A5	nonDAG
GTEx human tissues	male reproductive organ	testis	NUP210L	nonDAG
GTEx human tissues	male reproductive organ	testis	NUTM1	nonDAG
GTEx human tissues	male reproductive organ	testis	ODF1	nonDAG
GTEx human tissues	male reproductive organ	testis	ODF3L2	nonDAG
GTEx human tissues	male reproductive organ	testis	ODF4	nonDAG
GTEx human tissues	male reproductive organ	testis	PDCL2	nonDAG
GTEx human tissues	male reproductive organ	testis	PDZD9	nonDAG
GTEx human tissues	male reproductive organ	testis	PFN4	nonDAG
GTEx human tissues	male reproductive organ	testis	PGK2	nonDAG
GTEx human tissues	male reproductive organ	testis	PIWIL1	nonDAG
GTEx human tissues	male reproductive organ	testis	PIWIL2	nonDAG
GTEx human tissues	male reproductive organ	testis	PLCZ1	nonDAG
GTEx human tissues	male reproductive organ	testis	PMFBP1	nonDAG
GTEx human tissues	male reproductive organ	testis	PPP1R36	nonDAG
GTEx human tissues	male reproductive organ	testis	PRM1	nonDAG
GTEx human tissues	male reproductive organ	testis	PRM2	nonDAG
GTEx human tissues	male reproductive organ	testis	PRR19	nonDAG
GTEx human tissues	male reproductive organ	testis	PRR30	nonDAG
GTEx human tissues	male reproductive organ	testis	PRSS21	nonDAG
GTEx human tissues	male reproductive organ	testis	PRSS37	nonDAG
GTEx human tissues	male reproductive organ	testis	PRSS54	nonDAG
GTEx human tissues	male reproductive organ	testis	PRSS55	nonDAG
GTEx human tissues	male reproductive organ	testis	PRSS58	nonDAG
GTEx human tissues	male reproductive organ	testis	PSMA8	nonDAG
GTEx human tissues	male reproductive organ	testis	RBM44	nonDAG
GTEx human tissues	male reproductive organ	testis	REC114	nonDAG
GTEx human tissues	male reproductive organ	testis	RIBC2	nonDAG
GTEx human tissues	male reproductive organ	testis	RNF151	nonDAG
GTEx human tissues	male reproductive organ	testis	RNF17	nonDAG
GTEx human tissues	male reproductive organ	testis	RNF32	nonDAG
GTEx human tissues	male reproductive organ	testis	ROPN1	nonDAG
GTEx human tissues	male reproductive organ	testis	RPGRIP1	nonDAG
GTEx human tissues	male reproductive organ	testis	RSPH14	nonDAG
GTEx human tissues	male reproductive organ	testis	RSPH6A	nonDAG
GTEx human tissues	male reproductive organ	testis	SAMD15	nonDAG
GTEx human tissues	male reproductive organ	testis	SAXO1	nonDAG
GTEx human tissues	male reproductive organ	testis	SCP2D1	nonDAG
GTEx human tissues	male reproductive organ	testis	SHCBP1L	nonDAG
GTEx human tissues	male reproductive organ	testis	SLC22A14	nonDAG
GTEx human tissues	male reproductive organ	testis	SLC9B1	nonDAG
GTEx human tissues	male reproductive organ	testis	SLFNL1	nonDAG
GTEx human tissues	male reproductive organ	testis	SMC1B	nonDAG
GTEx human tissues	male reproductive organ	testis	SMCP	nonDAG
GTEx human tissues	male reproductive organ	testis	SOX30	nonDAG
GTEx human tissues	male reproductive organ	testis	SPA17	nonDAG
GTEx human tissues	male reproductive organ	testis	SPACA1	nonDAG
GTEx human tissues	male reproductive organ	testis	SPACA3	nonDAG
GTEx human tissues	male reproductive organ	testis	SPACA4	nonDAG
GTEx human tissues	male reproductive organ	testis	SPACA7	nonDAG
GTEx human tissues	male reproductive organ	testis	SPATA16	nonDAG
GTEx human tissues	male reproductive organ	testis	SPATA17	nonDAG
GTEx human tissues	male reproductive organ	testis	SPATA19	nonDAG
GTEx human tissues	male reproductive organ	testis	SPATA22	nonDAG
GTEx human tissues	male reproductive organ	testis	SPATA3	nonDAG
GTEx human tissues	male reproductive organ	testis	SPATA46	nonDAG
GTEx human tissues	male reproductive organ	testis	SPATC1	nonDAG
GTEx human tissues	male reproductive organ	testis	SPDYA	nonDAG
GTEx human tissues	male reproductive organ	testis	SPINK2	nonDAG
GTEx human tissues	male reproductive organ	testis	SPPL2C	nonDAG
GTEx human tissues	male reproductive organ	testis	SPZ1	nonDAG
GTEx human tissues	male reproductive organ	testis	STARD6	nonDAG
GTEx human tissues	male reproductive organ	testis	STK31	nonDAG
GTEx human tissues	male reproductive organ	testis	STKLD1	nonDAG
GTEx human tissues	male reproductive organ	testis	SUN3	nonDAG
GTEx human tissues	male reproductive organ	testis	SUN5	nonDAG
GTEx human tissues	male reproductive organ	testis	SYCE2	nonDAG
GTEx human tissues	male reproductive organ	testis	SYCE3	nonDAG
GTEx human tissues	male reproductive organ	testis	SYCP1	nonDAG
GTEx human tissues	male reproductive organ	testis	SYCP3	nonDAG
GTEx human tissues	male reproductive organ	testis	TBATA	nonDAG
GTEx human tissues	male reproductive organ	testis	TBC1D21	nonDAG
GTEx human tissues	male reproductive organ	testis	TCP11	nonDAG
GTEx human tissues	male reproductive organ	testis	TDRD5	nonDAG
GTEx human tissues	male reproductive organ	testis	TEKT1	nonDAG
GTEx human tissues	male reproductive organ	testis	TEKT3	nonDAG
GTEx human tissues	male reproductive organ	testis	TEKT4	nonDAG
GTEx human tissues	male reproductive organ	testis	TEKT5	nonDAG
GTEx human tissues	male reproductive organ	testis	TESMIN	nonDAG
GTEx human tissues	male reproductive organ	testis	TEX101	nonDAG
GTEx human tissues	male reproductive organ	testis	TEX14	nonDAG
GTEx human tissues	male reproductive organ	testis	TEX26	nonDAG
GTEx human tissues	male reproductive organ	testis	TEX33	nonDAG
GTEx human tissues	male reproductive organ	testis	TEX35	nonDAG
GTEx human tissues	male reproductive organ	testis	TEX37	nonDAG
GTEx human tissues	male reproductive organ	testis	TEX38	nonDAG
GTEx human tissues	male reproductive organ	testis	TEX43	nonDAG
GTEx human tissues	male reproductive organ	testis	TEX44	nonDAG
GTEx human tissues	male reproductive organ	testis	THEG	nonDAG
GTEx human tissues	male reproductive organ	testis	TKTL1	nonDAG
GTEx human tissues	male reproductive organ	testis	TMCO2	nonDAG
GTEx human tissues	male reproductive organ	testis	TMCO5A	nonDAG
GTEx human tissues	male reproductive organ	testis	TMEM190	nonDAG
GTEx human tissues	male reproductive organ	testis	TMEM191C	nonDAG
GTEx human tissues	male reproductive organ	testis	TMEM202	nonDAG
GTEx human tissues	male reproductive organ	testis	TMEM225	nonDAG
GTEx human tissues	male reproductive organ	testis	TMEM239	nonDAG
GTEx human tissues	male reproductive organ	testis	TMEM247	nonDAG
GTEx human tissues	male reproductive organ	testis	TMEM89	nonDAG
GTEx human tissues	male reproductive organ	testis	TMEM95	nonDAG
GTEx human tissues	male reproductive organ	testis	TNP1	nonDAG
GTEx human tissues	male reproductive organ	testis	TNP2	nonDAG
GTEx human tissues	male reproductive organ	testis	TPD52L3	nonDAG
GTEx human tissues	male reproductive organ	testis	TPPP2	nonDAG
GTEx human tissues	male reproductive organ	testis	TRIM42	nonDAG
GTEx human tissues	male reproductive organ	testis	TSACC	nonDAG
GTEx human tissues	male reproductive organ	testis	TSGA10IP	nonDAG
GTEx human tissues	male reproductive organ	testis	TSGA13	nonDAG
GTEx human tissues	male reproductive organ	testis	TSKS	nonDAG
GTEx human tissues	male reproductive organ	testis	TSPAN16	nonDAG
GTEx human tissues	male reproductive organ	testis	TSSK1B	nonDAG
GTEx human tissues	male reproductive organ	testis	TSSK6	nonDAG
GTEx human tissues	male reproductive organ	testis	TTC16	nonDAG
GTEx human tissues	male reproductive organ	testis	TTC23L	nonDAG
GTEx human tissues	male reproductive organ	testis	TTC29	nonDAG
GTEx human tissues	male reproductive organ	testis	TTLL6	nonDAG
GTEx human tissues	male reproductive organ	testis	TULP2	nonDAG
GTEx human tissues	male reproductive organ	testis	TXNDC2	nonDAG
GTEx human tissues	male reproductive organ	testis	UBE2U	nonDAG
GTEx human tissues	male reproductive organ	testis	UBQLN3	nonDAG
GTEx human tissues	male reproductive organ	testis	UBQLNL	nonDAG
GTEx human tissues	male reproductive organ	testis	VWA3B	nonDAG
GTEx human tissues	male reproductive organ	testis	WDR87	nonDAG
GTEx human tissues	male reproductive organ	testis	WDR88	nonDAG
GTEx human tissues	male reproductive organ	testis	ZC2HC1B	nonDAG
GTEx human tissues	male reproductive organ	testis	ZCCHC13	nonDAG
GTEx human tissues	male reproductive organ	testis	ZNF541	nonDAG
GTEx human tissues	male reproductive organ	testis	ZNF683	nonDAG
GTEx human tissues	male reproductive organ	testis	ZPBP	nonDAG
GTEx human tissues	male reproductive organ	testis	ZPBP2	nonDAG
GTEx human tissues	leukocytes	EBV transformed lymphocytes	ANGPTL6	nonDAG
GTEx human tissues	leukocytes	EBV transformed lymphocytes	BORA	nonDAG
GTEx human tissues	leukocytes	EBV transformed lymphocytes	BUB1	nonDAG
GTEx human tissues	leukocytes	EBV transformed lymphocytes	BUB1B	nonDAG
GTEx human tissues	leukocytes	EBV transformed lymphocytes	CDCA2	nonDAG
GTEx human tissues	leukocytes	EBV transformed lymphocytes	CDKN3	nonDAG
GTEx human tissues	leukocytes	EBV transformed lymphocytes	CENPF	nonDAG
GTEx human tissues	leukocytes	EBV transformed lymphocytes	DEPDC1B	nonDAG
GTEx human tissues	leukocytes	EBV transformed lymphocytes	DLGAP5	nonDAG
GTEx human tissues	leukocytes	EBV transformed lymphocytes	DTL	nonDAG
GTEx human tissues	leukocytes	EBV transformed lymphocytes	ESPL1	nonDAG
GTEx human tissues	leukocytes	EBV transformed lymphocytes	FANCA	nonDAG
GTEx human tissues	leukocytes	EBV transformed lymphocytes	FANCD2	nonDAG
GTEx human tissues	leukocytes	EBV transformed lymphocytes	FCER2	nonDAG
GTEx human tissues	leukocytes	EBV transformed lymphocytes	HJURP	nonDAG
GTEx human tissues	leukocytes	EBV transformed lymphocytes	IL4I1	nonDAG
GTEx human tissues	leukocytes	EBV transformed lymphocytes	KIF15	nonDAG
GTEx human tissues	leukocytes	EBV transformed lymphocytes	KIF20A	nonDAG
GTEx human tissues	leukocytes	EBV transformed lymphocytes	KIF20B	nonDAG
GTEx human tissues	leukocytes	EBV transformed lymphocytes	KIF2C	nonDAG
GTEx human tissues	leukocytes	EBV transformed lymphocytes	KIF4A	nonDAG
GTEx human tissues	leukocytes	EBV transformed lymphocytes	NCAPH	nonDAG
GTEx human tissues	leukocytes	EBV transformed lymphocytes	NDC80	nonDAG
GTEx human tissues	leukocytes	EBV transformed lymphocytes	NEK2	nonDAG
GTEx human tissues	leukocytes	EBV transformed lymphocytes	PAX5	nonDAG
GTEx human tissues	leukocytes	EBV transformed lymphocytes	PLK4	nonDAG
GTEx human tissues	leukocytes	EBV transformed lymphocytes	POC1A	nonDAG
GTEx human tissues	leukocytes	EBV transformed lymphocytes	RAD51	nonDAG
GTEx human tissues	leukocytes	EBV transformed lymphocytes	RAD54L	nonDAG
GTEx human tissues	leukocytes	EBV transformed lymphocytes	SGO2	nonDAG
GTEx human tissues	leukocytes	EBV transformed lymphocytes	SHCBP1	nonDAG
GTEx human tissues	leukocytes	EBV transformed lymphocytes	SIT1	nonDAG
GTEx human tissues	leukocytes	EBV transformed lymphocytes	SKA3	nonDAG
GTEx human tissues	leukocytes	EBV transformed lymphocytes	SPC24	nonDAG
GTEx human tissues	leukocytes	EBV transformed lymphocytes	STIL	nonDAG
GTEx human tissues	leukocytes	EBV transformed lymphocytes	TNFRSF13C	nonDAG
GTEx human tissues	leukocytes	EBV transformed lymphocytes	TRIP13	nonDAG
GTEx human tissues	leukocytes	EBV transformed lymphocytes	UHRF1	nonDAG
GTEx human tissues	leukocytes	EBV transformed lymphocytes	WDHD1	nonDAG
GTEx human tissues	leukocytes	EBV transformed lymphocytes	ZBTB32	nonDAG
GTEx human tissues	leukocytes	whole blood	ASGR2	nonDAG
GTEx human tissues	leukocytes	whole blood	CD247	nonDAG
GTEx human tissues	leukocytes	whole blood	CMTM2	nonDAG
GTEx human tissues	leukocytes	whole blood	IGSF6	nonDAG
GTEx human tissues	leukocytes	whole blood	PHOSPHO1	nonDAG
GTEx human tissues	leukocytes	whole blood	PROK2	nonDAG
GTEx human tissues	negative control	liver	AKR1D1	nonDAG
GTEx human tissues	negative control	liver	F7	nonDAG
GTEx human tissues	negative control	liver	SLC17A2	nonDAG
GTEx human tissues	negative control	nerve tibial	SLC25A48	nonDAG
